# Supplementary material for: Manganese(ii) chloride catalyzed highly efficient one-pot synthesis of propargylamines and fused triazoles via three-component coupling reaction under solvent-free condition
Source: Royal Society of Chemistry journal article supplement (doi:10.1039/c4ra03232b), 2014-01-01
Supplement: c4ra03232b1.pdf [file c4ra03232b1.pdf]

## Supporting Information

Manganese(II) chloride catalyzed highly efficient one pot synthesis of propargylamines and fused triazoles *via* three component coupling reaction under solvent free condition.

Shakil N. Afraj,<sup>[a]</sup> Chinpiao Chen,<sup>\*[a]</sup> Gene-Hsian Lee<sup>[b]</sup>

a. Department of Chemistry, National Dong Hwa University, Soufeng, Hualien 974, Taiwan  
Fax: (+886)-3-8633597, e-mail: [chinpiao@mail.ndhu.edu.tw](mailto:chinpiao@mail.ndhu.edu.tw)

b. Instrumentation Center, College of Science, National Taiwan University, Taipei 106, Taiwan

### CONTENTES

| Entry |                                                                                                                                                                                          | Page no |
|-------|------------------------------------------------------------------------------------------------------------------------------------------------------------------------------------------|---------|
| 1     | General                                                                                                                                                                                  | S2      |
| 2     | General experimental procedure for manganese(II) chloride catalyzed of three component coupling reaction.                                                                                | S2      |
| 3     | General experimental procedure for manganese(II) chloride catalyzed three component coupling followed by 1,3-dipolar cycloaddition                                                       | S8      |
| 4     | Crystallographic data of (4 <i>S</i> ,8 <i>aS</i> )-3-phenyl-4-(thien-3-yl)-4,6,7,8,8 <i>a</i> ,9-hexahydropyrrolo[1,2- <i>a</i> ][1,2,3] triazolo[1,5- <i>d</i> ]pyrazine ( <b>2s</b> ) | S14     |
| 5     | <sup>1</sup> H, <sup>13</sup> C, Spectra of propargylamines [ <b>1a–1af</b> ]                                                                                                            | S24     |
| 6     | <sup>1</sup> H, <sup>13</sup> C, Spectra of triazoles [ <b>2a–2t</b> ]                                                                                                                   | S56     |

## General

Ethanol was dried over magnesium cake. THF was distilled from sodium-benzophenone under argon. Dichloromethane (DCM), acetonitrile (ACN), diisopropylamine (DIPA) and dimethylformamide (DMF), dimethyl sulfoxide (DMSO) were distilled from CaH<sub>2</sub>. The aldehydes, amine (piperidine, morpholine, aniline), and alkynes were used as purchased. The azidomethylpyrrolidine was prepared by reported procedure. All reactions were carried out in screw capped sealed tube at 90 °C. Reactions were monitored by thin-layer chromatography using pre-coated silica gel 60 glass plates with F254 indicator. Visualization was accomplished by UV light (254 nm) in combination with iodine, potassium permanganate staining solutions. The products were purified by neutral column chromatography on 70–230 mesh silica gels. Yields refer to chromatographically and spectrographically pure material, unless otherwise noted. <sup>1</sup>H NMR and <sup>13</sup>C NMR spectra were obtained from 300 and 400 MHz NMR spectrometer, respectively. Chemical shifts ( $\delta$ ) are reported in parts per million (ppm) relative to CDCl<sub>3</sub> (7.26 and 77.0 ppm), the coupling constants are reported in Hertz (Hz) and the multiplicities are indicated as br = broad, s = singlet, d = doublet, dd = doublet of doublet, t = triplet, m = multiplet. Infrared spectra were recorded using Perkin Elmer FT/IR spectrometer. Mass spectra (EI-MS) and high resolution mass spectra (HRMS-EI) were determined on a Finnigan/Thermo Quest MAT 95XL mass spectrometer. Melting points are checked by the use of FGnFargo Instruments melting point apparatus. Melting point of the compounds might not be correct.

### General experimental procedure for manganese(II) chloride catalyzed three component coupling reaction

A mixture of aldehyde (1.0 mmol), amine (1.2 mmol), alkyne (1.5 mmol) and MnCl<sub>2</sub> (10 mol%) in sealed tube was stirred without solvent for 12 h at 90 °C. The progress of reaction was monitored by TLC. After completion of reaction, the product was purified by column chromatography using *n*-hexane/EtOAc as eluent to give the desired product. The products were further identified by FT-IR, <sup>1</sup>H and <sup>13</sup>C NMR spectroscopy, and HRMS, and all data were all in good agreement with assigned structures. The characterization data of all propargylamines are as follows.

**1-(1,3-diphenylprop-2-yn-1-yl)piperidine, 1a.** *R*<sub>f</sub> = 0.44 (EtOAc/hexane 1:9), Yield: 98%, Pale yellow solid; mp: 66–67 °C. <sup>1</sup>H NMR (300 MHz, CDCl<sub>3</sub>, ppm  $\delta$ ): 7.64–7.62 (d, *J* = 6.0 Hz, 2H), 7.53–7.50 (m, 2H), 7.38–7.28 (m, 6H), 4.79 (s, 1H), 2.57–2.54 (m, 4H), 1.61–1.56 (m, 4H), 1.47–1.42 (m, 2H); <sup>13</sup>C NMR (75 MHz, CDCl<sub>3</sub>,  $\delta$ ): 138.52, 131.69, 128.38, 128.15, 127.93, 127.34, 123.27, 87.80, 85.97, 62.29, 50.61, 26.10, 24.36; IR (KBr, thin film, cm<sup>-1</sup>): 3049, 2923, 2802 1596, 1486, 1445, 1270, 1152, 1094, 758, 691; LRMS-EI (*m/z*): 275 (12), 246 (3), 232 (4), 198 (50), 191 (100), 165 (7), 139 (2), 115 (9), 86 (5), 56 (6); HRMS-EI (*m/z*): M<sup>+</sup> calcd for C<sub>20</sub>H<sub>21</sub>N, 275.1674; found 275.1669.

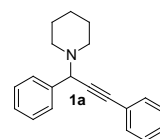

**4-(1,3-diphenylprop-2-yn-1-yl)morpholine 1b.** *R*<sub>f</sub> = 0.19 (EtOAc/hexane 1:9), Yield: 90%, Pale yellow oil. <sup>1</sup>H NMR (CDCl<sub>3</sub>, 300 MHz, ppm,  $\delta$ ): 7.64–7.62 (d, *J* = 6.0 Hz, 2H), 7.53–7.50 (m, 2H), 7.37–7.30 (m, 6H), 4.79 (s, 1H) 3.75–3.71 (m, 4H), 2.65–2.62 (m, 4H); <sup>13</sup>C NMR (75 MHz, CDCl<sub>3</sub>,  $\delta$ ): 137.70, 131.72, 128.51, 128.23, 128.15, 127.69, 122.91, 88.41, 84.96, 67.08, 61.97, 49.80; IR (KBr, thin film, cm<sup>-1</sup>): 2950, 2857, 2818, 1599, 1316, 1228, 1110, 998, 864, 746, 699; LRMS-EI (*m/z*): 277 (27), 246 (7), 232 (2), 219 (4), 200 (4), 191 (100), 165 (5), 115 (4), 86 (15), 56 (11); HRMS-EI (*m/z*): M<sup>+</sup> calcd for C<sub>19</sub>H<sub>19</sub>NO, 277.1467; found 277.1475.

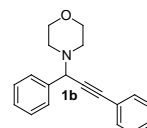

**4-(4-methyl-1-phenylprop-1-yn-3-yl)morpholine 1c.**  $R_f = 0.19$  (EtOAc/hexane 1:9), Yield: 96%, Pale yellow solid; mp: 42–43 °C.  $^1\text{H}$  NMR (300 MHz,  $\text{CDCl}_3$ , ppm,  $\delta$ ): 7.45–7.42 (m, 2H), 7.30–7.28 (m, 3H), 3.77–3.72 (m, 4H), 3.03–3.00 (m, 1H), 2.74–2.70 (m, 2H), 2.68–2.67 (m, 2H), 2.55–2.48 (m, 1H), 1.12–1.10 (d,  $J = 6.7$  Hz, 3H), 1.04–1.02 (d,  $J = 4.3$  Hz, 3H);  $^{13}\text{C}$  NMR (75 MHz,  $\text{CDCl}_3$ ,  $\delta$ ): 131.43, 127.95, 127.59, 123.15, 86.42, 66.88, 64.97, 49.75, 29.68, 20.12, 19.55; IR (KBr, thin film,  $\text{cm}^{-1}$ ): 2961, 2802, 1593, 1484, 1319, 1253, 1111, 1009, 864, 760, 691; LRMS-EI ( $m/z$ ): 242 (0.2), 228 (0.3), 200 (100), 169 (0.3), 141 (4), 128 (5), 115 (17), 91 (1), 77 (2), 54 (4); HRMS-EI ( $m/z$ ):  $M^+$  calcd for  $\text{C}_{16}\text{H}_{21}\text{NO}$ , 243.1623; found 243.1615.

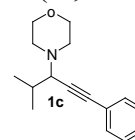

**4-(3-phenyl-1-(thiophen-2-yl)prop-2-yn-1-yl)morpholine 1d.**

$R_f = 0.19$  (EtOAc/hexane 1:9), Yield: 93%. Brown oil,  $^1\text{H}$  NMR ( $\text{CDCl}_3$ , 300 MHz, ppm,  $\delta$ ): 7.51–7.48 (m, 2H), 7.43–7.42 (m, 1H), 7.34–7.31 (m, 4H), 7.29–7.23 (m, 1H), 4.82 (s, 1H), 3.76–3.72 (m, 4H), 2.64–2.61 (m, 4H);  $^{13}\text{C}$  NMR (75 MHz,  $\text{CDCl}_3$ ,  $\delta$ ): 139.26, 131.49, 128.07, 127.38, 125.46, 123.37, 122.64, 87.02, 84.99, 66.79, 57.51, 53.22, 49.39. IR (KBr, thin film,  $\text{cm}^{-1}$ ): 2956, 2851, 2736, 1596, 1486, 1451, 1316, 1281, 1113, 1004, 916, 754, 685; LRMS-EI ( $m/z$ ): 283 (24), 252 (3), 198 (21), 197 (100), 165 (2), 152 (6), 139 (2), 115 (3), 86 (9), 56 (7); HRMS-EI ( $m/z$ ):  $M^+$  calcd for  $\text{C}_{17}\text{H}_{17}\text{NOS}$ , 283.1031; found 283.1022.

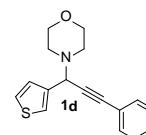

***N,N*-diisopropyl-1,3-diphenylprop-2-yn-1-amine 1e.**

$R_f = 0.19$  (EtOAc/hexane 1:9), Yield: 65%, Pale yellow oil.  $^1\text{H}$  NMR (300 MHz,  $\text{CDCl}_3$ , ppm,  $\delta$ ): 7.77–7.74 (d,  $J = 9.0$  Hz, 2H), 7.51–7.48 (m, 3H), 7.37–7.28 (m, 5H), 5.04 (s, 1H), 3.27–3.18 (m, 2H), 1.32–1.30 (d,  $J = 6.0$  Hz, 6H), 1.08–1.06 (d,  $J = 6.0$  Hz, 6H);  $^{13}\text{C}$  NMR (75 MHz,  $\text{CDCl}_3$ , ppm,  $\delta$ ): 142.17, 131.31, 128.27, 127.80, 126.75, 91.59, 85.79, 50.55, 46.55, 23.76, 20.69; IR (KBr, thin film,  $\text{cm}^{-1}$ ): 3428, 2956, 2917, 1633, 1486, 1445, 1270, 1182, 1113, 754, 688; LRMS-EI ( $m/z$ ): 291 (3), 276 (11), 214 (7), 192 (15), 191 (100), 105 (4), 91 (6), 77 (3), 51 (1); HRMS-EI ( $m/z$ ):  $M^+$  calcd for  $\text{C}_{21}\text{H}_{25}\text{N}$ , 291.1987; found 291.1992.

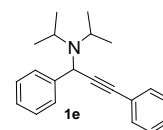

***N*-(1,3-diphenylprop-2-yn-1-yl)aniline 1f.**

$R_f = 0.44$  (EtOAc/hexane 1:9), Yield: 69%, yellow solid, mp: 88–90 °C.  $^1\text{H}$  NMR (300 MHz,  $\text{CDCl}_3$ , ppm,  $\delta$ ): 7.73–7.70 (d,  $J = 9.0$  Hz, 2H), 7.48–7.39 (m, 5H), 7.33–7.29 (m, 5H), 6.87–6.82 (m, 2H), 5.56 (s, 1H), 4.33 (br, s 1H);  $^{13}\text{C}$  NMR (75 MHz,  $\text{CDCl}_3$ , ppm,  $\delta$ ): 146.48, 139.65, 129.05, 131.65, 128.83, 128.70, 128.66, 128.18, 128.11, 127.96, 127.20, 122.68, 120.77, 118.45, 113.99, 88.47, 84.96, 50.51; IR (KBr, thin film,  $\text{cm}^{-1}$ ): 3373, 3049, 1593, 1486, 754, 691; LRMS-EI ( $m/z$ ): 283 (11), 206 (6), 191 (100), 189 (15), 165 (5), 77 (5), 65 (2); HRMS-EI ( $m/z$ ):  $M^+$  calcd for  $\text{C}_{21}\text{H}_{17}\text{N}$ , 283.1361; found 283.1353.

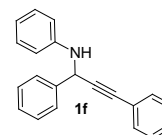

**1-(3-phenyl-1-(*o*-tolyl)prop-2-yn-1-yl)piperidine 1g.**

$R_f = 0.44$  (EtOAc/hexane 1:9), Yield: 91%, Pale yellow oil.  $^1\text{H}$  NMR (300 MHz,  $\text{CDCl}_3$ , ppm,  $\delta$ ): 7.70–7.68 (m, 1H), 7.53–7.49 (m, 2H), 7.33–7.31 (m, 3H), 7.19–7.17 (m, 3H), 4.84 (s, 1H), 2.57–2.53 (m, 4H), 2.46 (s, 3H), 1.56–1.51 (m, 4H), 1.49–1.40 (m, 2H);  $^{13}\text{C}$  NMR (75 MHz,  $\text{CDCl}_3$ , ppm,  $\delta$ ): 137.59, 136.74, 131.74, 130.54, 128.90, 128.22, 127.90, 127.43, 125.13, 123.47, 88.07, 85.99, 60.19, 50.51, 26.28, 24.59, 19.01; IR (KBr, thin film,  $\text{cm}^{-1}$ ): 2928, 2831, 2736, 1596, 1486, 1311, 1111, 1083, 847, 754, 688; LRMS-EI ( $m/z$ ): 288 (9), 246 (3), 204 (100), 198 (67), 191 (10), 165 (4), 127 (7), 115 (9), 84 (11), 77 (5); HRMS-EI ( $m/z$ ):  $M^+$  calcd for  $\text{C}_{21}\text{H}_{23}\text{N}$ , 289.1830; found 289.1822.

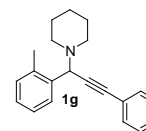

**1-(3-phenyl-1-(*m*-tolyl)prop-2-yn-1-yl)piperidine 1h.**

$R_f = 0.44$  (EtOAc/hexane 1:9), Yield: 95%, brown oil.  $^1\text{H}$  NMR (300 MHz,  $\text{CDCl}_3$ , ppm,  $\delta$ ): 7.54–7.50 (m, 2H), 7.47–7.41 (m, 3H), 7.33–7.31 (m, 3H), 7.11–7.09 (m, 1H), 4.77 (s, 1H), 2.59–2.56 (m,

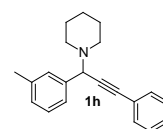

2H), 2.45–2.44 (m, 2H), 2.37 (s, 3H), 1.62–1.57 (m, 4H), 1.47–1.42 (m, 2H);  $^{13}\text{C}$  NMR (75 MHz,  $\text{CDCl}_3$ , ppm,  $\delta$ ): 138.19, 137.58, 131.74, 129.22, 128.22, 128.18, 127.96, 127.87, 125.69, 123.29, 87.78, 86.15, 62.26, 50.61, 25.97, 24.35, 21.45 (KBr, thin film,  $\text{cm}^{-1}$ ): 2928, 2851, 2727, 1604, 1486, 1314, 1157, 1083, 987, 754, 688; LRMS-EI ( $m/z$ ): 289 (29), 246 (5), 221 (9), 205 (100), 198 (80), 189 (8), 178 (4), 119 (8), 91 (7), 65 (2); HRMS-EI ( $m/z$ ):  $M^+$  calcd for  $\text{C}_{21}\text{H}_{23}\text{N}$ , 289.1830; found 289.1824.

### 1-(3-phenyl-1-(*p*-tolyl)prop-2-yn-1-yl)piperidine 1i.

$R_f$  = 0.44 (EtOAc/hexane 1:9), Yield: 97%; brown oil.  $^1\text{H}$  NMR (300 MHz,  $\text{CDCl}_3$ , ppm,  $\delta$ ): 7.52–7.49 (m, 4H), 7.33–7.30 (m, 3H), 7.17–7.15 (d,  $J$  = 6.0 Hz, 2H), 4.77 (s, 1H), 2.58–2.54 (m, 4H), 2.35 (s, 3H), 1.62–1.56 (m, 4H), 1.47–1.41 (m, 2H);  $^{13}\text{C}$  NMR (75 MHz,  $\text{CDCl}_3$ , ppm,  $\delta$ ): 137.12, 135.32, 131.84, 128.72, 128.50, 128.21, 127.96, 123.43, 87.60, 86.27, 62.09, 50.61, 26.06, 24.40, 21.04; (KBr, thin film,  $\text{cm}^{-1}$ ): 2928, 2851, 2802, 1596, 1440, 1314, 1270, 1091, 817, 751, 688; LRMS-EI ( $m/z$ ): 289 (30), 274 (3), 246 (4), 207 (3), 205 (100), 198 (40), 189 (6), 115 (4), 105 (2), 84 (3); HRMS-EI ( $m/z$ ):  $M^+$  calcd for  $\text{C}_{21}\text{H}_{23}\text{N}$ , 289.1830; found 289.1828.

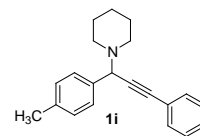

### 1-(1-(2-chlorophenyl)-3-phenylprop-2-yn-1-yl)piperidine 1j.

$R_f$  = 0.44 (EtOAc/hexane 1:9), Yield: 93%, pale yellow oil.  $^1\text{H}$  NMR (300 MHz,  $\text{CDCl}_3$ , ppm,  $\delta$ ): 7.77–7.76 (d,  $J$  = 3.0 Hz, 1H), 7.45–7.40, (m, 2H), 7.39–7.37 (m, 1H), 7.33–7.23, (m, 5H), 5.10 (s 1H), 2.63–2.59 (m, 4H), 1.59–1.56 (m, 4H), 1.42–1.41 (m, 2H),  $^{13}\text{C}$  NMR (75 MHz,  $\text{CDCl}_3$ , ppm,  $\delta$ ): 136.29, 134.54, 131.62, 130.37, 129.62, 128.61, 128.11, 127.96, 126.00, 123.02, 87.65, 85.62, 59.19, 50.60, 26.03 24.35; IR (KBr, thin film,  $\text{cm}^{-1}$ ): 3060, 2928, 2851, 2749, 1593, 1484 1314, 1156, 1086, 858, 746, 688; LRMS-EI ( $m/z$ ): 309 (26), 266 (6), 232 (8), 227 (31), 225 (99), 198 (100), 189 (23), 115 (23), 84 (7); HRMS-EI ( $m/z$ ):  $M^+$  calcd for  $\text{C}_{20}\text{H}_{20}\text{ClN}$ , 309.1284; found 309.1283.

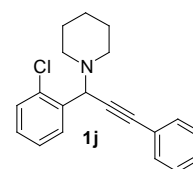

### 1-(1-(3-chlorophenyl)-3-phenylprop-2-yn-1-yl)piperidine 1k.

$R_f$  = 0.44 (EtOAc/hexane 1:9), Yield: 92%, brown oil.  $^1\text{H}$  NMR (300 MHz,  $\text{CDCl}_3$ , ppm,  $\delta$ ): 7.65 (s, 1H), 7.65–7.64 (m, 3H), 7.53–7.50 (m, 3H), 7.35–7.27 (m, 2H), 4.77 (s, 1H), 2.56–2.53 (m, 4H), 1.64–1.55 (m, 4H) 1.48–1.42 (m, 2H);  $^{13}\text{C}$  NMR (75 MHz,  $\text{CDCl}_3$ , ppm,  $\delta$ ): 140.82, 134.04, 131.78, 129.24, 128.48, 128.24, 128.18, 127.60, 126.59, 123.14, 88.36, 85.11, 61.92, 50.55, 26.20, 24.11; IR (KBr, thin film,  $\text{cm}^{-1}$ ): 3060, 2928, 2846, 2741, 1593, 1489, 1314, 1152, 1086, 831, 791, 685; LRMS-EI ( $m/z$ ): 309 (18), 266 (5), 232 (4), 227 (22), 225 (72), 198 (100), 189 (19), 115 (70), 84 (6); HRMS-EI ( $m/z$ ):  $M^+$  calcd for  $\text{C}_{16}\text{H}_{20}\text{N}$ , 309.1284; found 309.1279.

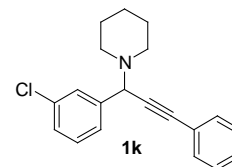

### 1-(1-(4-chlorophenyl)-3-phenylprop-2-yn-1-yl)piperidine 1l.

$R_f$  = 0.44 (EtOAc/hexane 1:9), Yield: 96%, pale yellow oil.  $^1\text{H}$  NMR (300 MHz,  $\text{CDCl}_3$ , ppm,  $\delta$ ): 7.59–7.52 (m, 2H), 7.51–7.49 (m, 2H), 7.34–7.30 (m, 5H), 4.77 (s, 1H), 2.56–2.52 (m, 4H), 1.64–1.56 (m, 4H), 1.48–1.42 (m, 2H);  $^{13}\text{C}$  NMR (75 MHz,  $\text{CDCl}_3$ , ppm,  $\delta$ ): 140.78, 137.08, 134.62, 133.14, 131.70, 130.75, 129.75, 129.30, 128.21, 128.09, 122.99, 88.23, 85.20, 61.58, 50.49, 26.00, 24.27; IR (KBr, thin film,  $\text{cm}^{-1}$ ): 3049, 2934, 2861, 2741, 1659, 1593, 1484, 1314, 1154, 1086, 852, 754, 688 ; LRMS-EI ( $m/z$ ): 309 (20), 266 (4), 232 (3), 227 (31), 225 (100), 198 (48), 189 (18), 115 (5), 84 (3); HRMS-EI ( $m/z$ ):  $M^+$  calcd for  $\text{C}_{20}\text{H}_{20}\text{ClN}$ , 309.1284; found 309.1287.

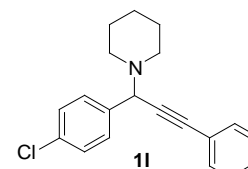

### 1-(1-(4-fluorophenyl)-3-phenylprop-2-yn-1-yl)piperidine 1m.

$R_f$  = 0.44 (EtOAc/hexane 1:9), Yield: 94%, pale yellow oil.  $^1\text{H}$  NMR (300 MHz,  $\text{CDCl}_3$ , ppm,  $\delta$ ): 7.44–7.36 (m, 5H), 7.34–7.29 (m, 4H), 4.79 (s, 1H), 2.57–2.53 (m, 4H), 1.62–1.59 (m, 4H), 1.48–1.42 (m, 2H);  $^{13}\text{C}$  NMR (75 MHz,  $\text{CDCl}_3$ ,

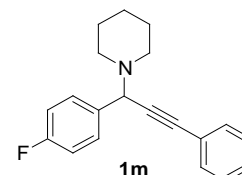

ppm,  $\delta$ ): 162.80 (d,  $J = 244$  Hz), 141.44 (d,  $J = 6.48$  Hz), 131.82, 129.39 (d,  $J = 8.63$  Hz), 128.28, 128.18, 124.00, 123.97, 123.04, 115.34 (d,  $J = 22.6$  Hz), 114.33 (d,  $J = 21.6$  Hz), 88.24, 85.48, 61.98, 50.69, 26.03, 24.19; IR (KBr, thin film,  $\text{cm}^{-1}$ ): 3049, 2934, 2918, 1593, 1484, 1314, 1201, 1086, 1012, 754, 688; LRMS-EI ( $m/z$ ): 293 (24), 250 (6), 225 (9), 210 (19), 209 (100), 198 (95), 183 (4), 115 (6), 84 (5); HRMS-EI ( $m/z$ ):  $M^+$  calcd for  $\text{C}_{20}\text{H}_{20}\text{NF}$ , 293.1580; found 293.1576.

### 1-(1-(naphthalen-1-yl)-3-phenylprop-2-yn-1-yl)piperidine 1n.

$R_f = 0.48$  (EtOAc/hexane 1:9), Yield: 96%, pale yellow solid, mp: 126–128 °C.

$^1\text{H}$  NMR (300 MHz,  $\text{CDCl}_3$ , ppm,  $\delta$ ): 8.41–8.39 (d,  $J = 9.0$  Hz, 1H), 7.93–7.79 (m, 3H), 7.56–7.50 (m, 5H), 7.44–7.33 (m, 3H), 5.42 (s, 1H), 2.67–2.58 (m, 4H), 1.59–1.52 (m, 4H), 1.50–1.44 (m, 2H);  $^{13}\text{C}$  NMR (75 MHz,  $\text{CDCl}_3$ , ppm,  $\delta$ ):

134.22, 133.98, 131.89, 131.78, 128.49, 128.33, 128.25, 127.97, 126.79, 125.67, 125.48, 124.98, 124.98, 124.70, 123.41, 88.34, 88.02, 60.59, 60.64, 26.20, 24.54, IR (KBr, thin film,  $\text{cm}^{-1}$ ): 3054, 2928, 2802, 1593, 1488, 1437, 1281, 781, 751, 688; LRMS-EI ( $m/z$ ): 325 (19), 242 (25), 241 (100), 239 (39), 198 (31), 115 (6), 84 (16); HRMS-EI ( $m/z$ ):  $M^+$  calcd for  $\text{C}_{24}\text{H}_{23}\text{N}$ , 325.1830; found 325.1822.

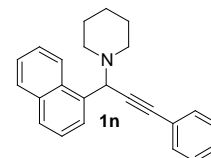

### 1-(1-(1,1'-biphenyl-3-yl)-3-phenylprop-2-yn-1-yl)piperidine 1o.

$R_f = 0.48$  (EtOAc/hexane 1:9), Yield: 94%, pale yellow oil.  $^1\text{H}$  NMR (300 MHz,  $\text{CDCl}_3$ , ppm,  $\delta$ ): 7.83–7.80 (m, 1H), 7.57–7.55 (m, 2H), 7.48–7.43 (m, 2H), 7.42–7.35 (m, 5H), 7.34–7.29 (m, 4H), 4.63 (s, 1H), 2.58–2.54 (m, 2H), 2.38–2.32 (m, 2H), 1.50–1.48 (m, 4H), 1.42–1.39 (m, 2H);  $^{13}\text{C}$  NMR (75 MHz,  $\text{CDCl}_3$ , ppm,  $\delta$ ):

142.77, 141.30, 136.55, 131.71, 129.73, 129.33, 128.19, 127.88, 127.60, 127.36, 126.92, 126.70, 123.44, 126.94, 87.54, 86.85, 59.19, 50.20, 26.20, 24.58. IR (KBr, thin film,  $\text{cm}^{-1}$ ): 3043, 2928, 2796, 2747, 1432, 1390, 1196, 823, 746, 699; LRMS-EI ( $m/z$ ): 351 (89), 350 (71), 308 (14), 274 (19), 266 (36), 265 (53), 252 (21), 198 (8), 165 (100), 115 (11), 84 (7); HRMS-EI ( $m/z$ ):  $M^+$  calcd for  $\text{C}_{26}\text{H}_{25}\text{N}$ , 351.1987; found 351.1989.

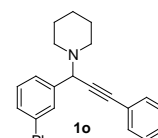

### 1-(1-phenyl-3-(trimethylsilyl)prop-2-yn-1-yl)piperidine 1p.

$R_f = 0.49$  (EtOAc/hexane 1:9), Yield: 89%, Yellow oil.  $^1\text{H}$  NMR (300 MHz,  $\text{CDCl}_3$ , ppm,  $\delta$ ): 7.57–7.54 (m, 2H), 7.35–7.29 (m, 3H), 4.61 (s, 1H), 1.60–1.56 (m, 4H), 1.30–1.26 (m, 6H), 0.23 (s, 9H);  $^{13}\text{C}$  NMR (75 MHz,  $\text{CDCl}_3$ , ppm,  $\delta$ ): 129.55, 128.82, 128.33, 127.84, 127.23, 102.27, 92.30, 62.61, 50.55, 26.20, 24.58, 0.2319; IR (KBr, thin film,  $\text{cm}^{-1}$ ): 3308, 2934, 2802, 2159, 1448, 1251, 1103, 999, 839, 757; LRMS-EI ( $m/z$ ): 271 (13), 198 (14), 195 (17), 194 (100), 187 (9), 159 (27), 145 (5), 105 (4), 84 (9), 73 (7); HRMS-EI ( $m/z$ ):  $M^+$  calcd for  $\text{C}_{17}\text{H}_{25}\text{NSi}$ , 271.1756; found 271.1750.

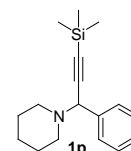

### 1-(3-(4-methoxyphenyl)-1-phenylprop-2-yn-1-yl)piperidine 1q.

$R_f = 0.42$  (EtOAc/hexane 1:9), Yield: 97%, Brown oil,  $^1\text{H}$  NMR (300 MHz,  $\text{CDCl}_3$ , ppm,  $\delta$ ): 7.64–7.61 (m, 2H), 7.46–7.43 (m, 2H), 7.35–7.27 (m, 3H), 6.87–7.84 (m, 2H), 4.77 (s, 1H), 3.82 (s, 3H), 2.57–2.53 (m, 4H), 1.53–1.57 (m, 4H), 1.61–1.56 (m, 2H);  $^{13}\text{C}$  NMR (75 MHz,  $\text{CDCl}_3$ ,  $\delta$ ): 159.35, 138.70, 133.07, 128.43, 127.91, 127.29, 115.42, 113.79, 87.56, 84.41, 62.31, 55.13, 50.58, 26.10, 24.38; IR (KBr, thin film,  $\text{cm}^{-1}$ ): 2934, 2840, 2791, 1602, 1508, 1286, 1245, 1171, 1028, 831, 705; LRMS-EI ( $m/z$ ): 305 (26), 262 (3), 229 (5), 228 (41), 221 (100), 206 (6), 178 (10), 145 (3); HRMS-EI ( $m/z$ ):  $M^+$  calcd for  $\text{C}_{21}\text{H}_{23}\text{NO}$ , 305.1780; found 305.1770.

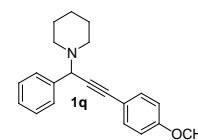

### 1-(3-(4-methoxyphenyl)-1-(p-tolyl)prop-2-yn-1-yl)piperidine 1r.

$R_f = 0.42$  (EtOAc/hexane 1:9), Yield: 96%, white solid. mp 81–82 °C.  $^1\text{H}$  NMR (300 MHz,  $\text{CDCl}_3$ , ppm,  $\delta$ ): 7.50–7.42 (m, 4H), 7.17–7.14 (m, 2H), 6.86–6.83

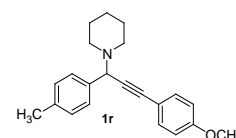

(m, 2H), 4.72 (s, 1H), 3.81 (s, 3H), 2.55–2.53 (m, 4H), 2.35 (s, 3H), 1.60–1.55 (m, 4H), 1.46–1.41 (m, 2H);  $^{13}\text{C}$  NMR (75 MHz,  $\text{CDCl}_3$ , ppm,  $\delta$ ): 159.34, 136.92, 135.68, 133.08, 128.65, 128.43, 115.52, 113.80, 87.32, 84.74, 62.09, 55.18, 50.59, 26.11, 24.41, 21.03; IR (KBr, thin film,  $\text{cm}^{-1}$ ): 2928, 2796, 1602, 1508, 1289, 1245, 1166, 1028, 828, 653; LRMS-EI ( $m/z$ ): 319 (17), 318 (6), 236 (18), 228 (13), 220 (5), 192 (7); HRMS-EI ( $m/z$ ):  $\text{M}^+$  calcd for  $\text{C}_{22}\text{H}_{25}\text{NO}$ , 319.1936; found 319.1930.

### 1-(1-(3-chlorophenyl)-3-(4-methoxyphenyl)prop-2-yn-1-yl)piperidine 1s.

$R_f$  = 0.42 (EtOAc/hexane 1:9), Yield: 94%, brown oil.  $^1\text{H}$  NMR (300 MHz,  $\text{CDCl}_3$ , ppm,  $\delta$ ): 7.63 (s, 1H), 7.54–7.53 (m, 1H), 7.52–7.43 (m, 2H), 7.30–7.22 (m, 2H), 6.88–6.85 (m, 2H), 4.74 (s, 1H), 3.82 (s, 3H), 2.54–2.51 (m, 4H), 1.61–1.56 (m, 4H), 1.47–1.42 (m, 2H);  $^{13}\text{C}$  NMR (75 MHz,  $\text{CDCl}_3$ , ppm,  $\delta$ ): 159.44, 141.09, 133.87, 129.09, 128.36, 127.40, 130.71, 126.48, 115.03, 88.07, 83.43, 61.77, 55.08, 50.55, 26.03, 24.26, IR (KBr, thin film,  $\text{cm}^{-1}$ ): 2934, 2802, 1604, 1506, 1467, 1289, 1245, 1171, 1034, 828, 694; LRMS-EI ( $m/z$ ): 339 (28), 257 (38), 255 (100), 228 (67), 212 (7), 176 (7), 145 (4), 84 (2); HRMS-EI ( $m/z$ ):  $\text{M}^+$  calcd for  $\text{C}_{21}\text{H}_{22}\text{ClNO}$ , 339.1390; found 339.1386.

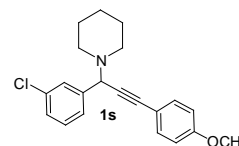

### 1-(1-(4-methoxyphenyl)-4,4-dimethylpent-1-yn-3-yl)piperidine 1t.

$R_f$  = 0.42 (EtOAc/hexane 1:9), Yield: 98%, brown oil.  $^1\text{H}$  NMR (300 MHz,  $\text{CDCl}_3$ , ppm,  $\delta$ ): 7.38–7.36 (m, 2H), 6.84–6.81 (m, 2H), 3.80 (s, 3H), 3.05 (s, 1H), 2.68–2.74 (m, 2H), 2.50–2.42 (m, 2H), 1.59–1.55 (m, 4H), 1.43–1.37 (m, 2H), 1.01 (s, 9H);  $^{13}\text{C}$  NMR (75 MHz,  $\text{CDCl}_3$ , ppm,  $\delta$ ): 159.06, 132.87, 116.10, 113.75, 86.81, 85.22, 68.47, 55.14, 54.14, 36.83, 27.19, 26.78, 24.44; IR (KBr, thin film,  $\text{cm}^{-1}$ ): 2928, 2857, 2791, 1602, 1508, 1459, 1292, 1240, 1168, 1091, 1034, 995, 831, 803; LRMS-EI ( $m/z$ ): 284 (0.1), 270 (2), 229 (25), 228 (100), 213 (1), 184 (1), 145 (17), 115 (30), 102 (2), 77 (0.5); HRMS-EI ( $m/z$ ):  $\text{M}^+$  calcd for  $\text{C}_{19}\text{H}_{27}\text{NO}$ , 285.2093; found 285.2101

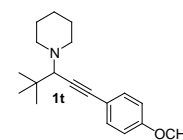

### 1-(1-(cyclohexyl-3-phenyl)prop-2-yn-1-yl)piperidine 1u:

$R_f$  = 0.48 (EtOAc/hexane 1:9), Yield: 95%, Pale yellow oil.  $^1\text{H}$  NMR (300 MHz,  $\text{CDCl}_3$ , ppm,  $\delta$ ): 7.45–7.42 (m, 2H), 7.31–7.27 (m, 3H), 3.12–3.09 (d,  $J$  = 9.0 Hz, 1H), 2.63–2.42 (m, 2H), 2.38–2.41 (m, 2H), 1.78–1.55 (m, 9H), 1.45–1.41 (m, 2H), 1.26–1.00 (m, 6H);  $^{13}\text{C}$  NMR (75 MHz,  $\text{CDCl}_3$ , ppm,  $\delta$ ): 131.69, 128.16, 127.58, 123.81, 87.69, 86.15, 64.47, 50.78, 39.65, 31.27, 30.61, 26.78, 26.26, 26.09, 24.58; IR (KBr, thin film,  $\text{cm}^{-1}$ ): 3055, 2928, 2852, 2750, 1598, 1489, 1443, 1318, 1156, 1103, 890, 755, 691; LRMS-EI ( $m/z$ ): 280 (0.3), 200 (1), 199 (14), 198 (100), 167 (0.5), 115 (13), 83 (1); HRMS-EI ( $m/z$ ):  $\text{M}^+$  calcd for  $\text{C}_{20}\text{H}_{27}\text{N}$ , 281.2143; found 281.2140.

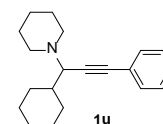

### 1-(4,4-dimethyl-1-phenylpent-1-yn-3-yl)piperidine 1v.

$R_f$  = 0.44 (EtOAc/hexane 1:9), Yield: 97%, pale yellow oil;  $^1\text{H}$  NMR (300 MHz,  $\text{CDCl}_3$ , ppm,  $\delta$ ): 7.46–7.42 (m, 2H), 7.30–7.27 (m, 3H), 3.07 (s, 1H), 2.75–2.68 (m, 2H), 2.49–2.44 (m, 2H), 1.60–1.55 (m, 4H), 1.43–1.38 (m, 2H), 1.02 (s, 9H);  $^{13}\text{C}$  NMR (75 MHz,  $\text{CDCl}_3$ , ppm,  $\delta$ ): 159.08, 132.91, 116.16, 113.78, 86.79, 85.24, 68.53, 55.22, 54.19, 36.90, 27.20, 26.80, 24.43; IR (KBr, thin film,  $\text{cm}^{-1}$ ): 2928, 2846, 2802, 2741, 1489, 1314, 1283, 1152, 1086, 990, 831, 751, 685; LRMS-EI ( $m/z$ ): 254 (0.1), 200 (1), 199 (19), 198 (100), 156 (1), 115 (20), 91 (1); HRMS-EI ( $m/z$ ):  $\text{M}^+$  calcd for  $\text{C}_{18}\text{H}_{25}\text{N}$ , 255.1987; found 255.1980.

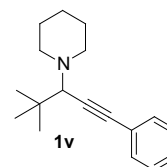

### 1-(1-ethyl-3-phenyl-prop-2-ynyl)-piperidine 1w.

$R_f$  = 0.44 (EtOAc/hexane 1:9), Yield: 96%, brown oil.  $^1\text{H}$  NMR (300 MHz,  $\text{CDCl}_3$ , ppm,  $\delta$ ): 7.44–7.42 (m, 2H), 7.29–7.25 (m, 3H), 3.42–3.36 (dd,  $J_1$  = 6.8 Hz,  $J_2$  = 7.6 Hz, 1H), 2.70–2.64 (m, 2H), 2.51–2.43 (m, 2H), 1.78–1.47 (m, 8H), 1.08–1.03 (t,  $J$  = 6.8 Hz, 3H);

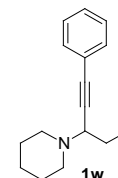

$^{13}\text{C}$  NMR (75 MHz,  $\text{CDCl}_3$ , ppm,  $\delta$ ): 131.64, 127.72, 123.57, 123.51, 87.81, 85.75, 60.31, 50.53, 26.51, 26.07, 24.55, 11.44; IR (KBr, thin film,  $\text{cm}^{-1}$ ): 3043, 2925, 2851, 2796, 1596, 1486, 1440, 1325, 1116, 990, 754, 688; LRMS-EI ( $m/z$ ): 226 (0.6), 199 (28), 198 (100), 166 (1), 141 (3), 128 (10), 115 (27), 91 (2); HRMS-EI ( $m/z$ ):  $\text{M}^+$  calcd for  $\text{C}_{16}\text{H}_{21}\text{N}$ , 227.1674; found 227.1667.

**1-(1-phenylhex-1-yn-3-yl)piperidine 1x.**  $R_f = 0.44$  (EtOAc/hexane 1:9), Yield: 95%, Pale yellow oil.  $^1\text{H}$  NMR (300 MHz,  $\text{CDCl}_3$ , ppm,  $\delta$ ): 7.45–7.42 (m, 2H), 7.29–7.27 (m, 3H), 3.52–3.47 (dd,  $J_1 = 10.2$  Hz,  $J_2 = 9.0$  Hz, 1H), 3.71–2.65 (m, 2H), 2.52–2.45 (m, 2H), 1.72–1.52 (m, 10H), 0.98–0.93 (t,  $J = 7.0$  Hz, 3H);  $^{13}\text{C}$  NMR (75 MHz,  $\text{CDCl}_3$ , ppm,  $\delta$ ): 131.56, 128.03, 127.56, 123.45, 87.90, 85.57, 58.14, 50.37, 35.42, 26.02, 24.45, 19.99, 13.75; IR (KBr, thin film,  $\text{cm}^{-1}$ ): 3049, 2934, 2857, 2686, 1684, 1596, 1489, 1322, 1155, 1116, 1028, 905, 861, 751, 691; LRMS-EI ( $m/z$ ): 241 (0.2), 221 (0.3), 199 (20), 198 (100), 169 (0.3), 128 (3), 115 (18), 91 (1); HRMS-EI ( $m/z$ ):  $\text{M}^+$  calcd for  $\text{C}_{17}\text{H}_{23}\text{N}$ , 241.1830; found 241.1827.

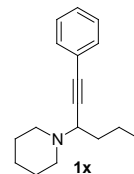

**1-(1-phenyloct-1-yn-3-yl)piperidine 1y.**  $R_f = 0.44$  (EtOAc/hexane 1:9), Yield 97%; brown oil.  $^1\text{H}$  NMR (300 MHz,  $\text{CDCl}_3$ , ppm,  $\delta$ ): 7.45–7.41 (m, 2H), 7.31–7.27 (m, 3H), 3.49–3.44 (dd,  $J_1 = 9.2$  Hz,  $J_2 = 8.8$  Hz, 1H), 2.70–2.66 (m, 2H), 2.65–2.48 (m, 2H), 1.73–1.42 (m, 8H), 1.34–1.30 (m, 6H), 0.91–0.87 (t,  $J = 7.8$  Hz, 3H);  $^{13}\text{C}$  NMR (100 MHz,  $\text{CDCl}_3$ , ppm,  $\delta$ ): 131.61, 128.12, 127.65, 123.50, 88.05, 85.51, 58.54, 50.53, 33.28, 31.48, 26.49, 26.02, 24.41, 22.53, 13.95; IR (KBr, thin film,  $\text{cm}^{-1}$ ): 3060, 2923, 2857, 2747, 1761, 1687, 1598, 1443, 1322, 1094, 751, 688; LRMS-EI ( $m/z$ ): 269 (0.3), 268 (0.4), 240 (0.6), 199 (21), 198 (100), 178 (0.8), 128 (3), 115 (16), 91 (2); HRMS-EI ( $m/z$ ):  $\text{M}^+$  calcd for  $\text{C}_{19}\text{H}_{27}\text{N}$ , 269.2143; found 269.2134.

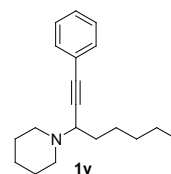

**1-(1-phenylnon-1-yn-3-yl)piperidine 1z.**  $R_f = 0.44$  (EtOAc/hexane 1:9), Yield 96%, brown oil.  $^1\text{H}$  NMR (300 MHz,  $\text{CDCl}_3$ , ppm,  $\delta$ ): 7.45–7.41 (m, 2H), 7.30–7.27 (m, 3H), 3.50–3.47 (dd,  $J_1 = 9.0$  Hz,  $J_2 = 8.6$  Hz, 1H), 2.72–2.65 (m, 2H), 2.52–2.46 (m, 2H), 1.73–1.60 (m, 10H), 1.36–1.30 (m, 6H), 0.90–0.86 (t,  $J = 7.2$  Hz, 3H);  $^{13}\text{C}$  NMR (100 MHz,  $\text{CDCl}_3$ , ppm,  $\delta$ ): 131.56, 128.01, 127.56, 123.50, 87.97, 85.52, 58.48, 50.39, 33.32, 31.64, 28.96, 26.69, 26.05, 24.47, 22.49, 13.91; IR (KBr, thin film,  $\text{cm}^{-1}$ ): 3054, 2938, 2864, 2796, 1593, 1486, 1440, 13.19, 1152, 1097, 861, 749, 685; LRMS-EI ( $m/z$ ): 283 (0.1), 262 (0.5), 228 (5), 221 (16), 206 (1), 199 (15), 198 (100), 128 (3), 115 (13), 91 (3); HRMS-EI ( $m/z$ ):  $\text{M}^+$  calcd for  $\text{C}_{20}\text{H}_{29}\text{N}$ , 283.2300; found 283.2295.

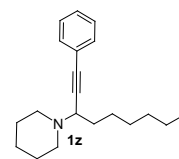

**1-(1-phenylnon-1-yn-3-yl)piperidine 1aa.**  $R_f = 0.44$  (EtOAc/hexane 1:9), Yield 97%, pale yellow oil.  $^1\text{H}$  NMR (300 MHz,  $\text{CDCl}_3$ , ppm,  $\delta$ ): 7.45–7.42 (m, 2H), 7.30–7.27 (m, 3H), 3.50–3.45 (dd,  $J_1 = 8.9$  Hz,  $J_2 = 8.8$  Hz, 1H), 3.69–2.66 (m, 2H), 2.65–2.48 (m, 2H), 1.74–1.43 (m, 10H), 1.35–1.28 (m, 8H), 0.90–0.86 (t,  $J = 6.7$  Hz, 3H);  $^{13}\text{C}$  NMR (75 MHz,  $\text{CDCl}_3$ , ppm,  $\delta$ ): 131.53, 127.96, 127.51, 123.48, 87.93, 85.51, 58.43, 50.32, 33.28, 31.68, 29.23, 29.07, 26.71, 26.02, 24.45, 22.51, 13.93; IR (KBr, thin film,  $\text{cm}^{-1}$ ): 3049, 2923, 2851, 2802, 1596, 1465, 1322, 1155, 1097, 754, 688; LRMS-EI ( $m/z$ ): 297 (0.3), 276 (0.1), 228 (4), 221 (14), 206 (1), 199 (16), 198 (100), 178 (1), 115 (12), 84 (2); HRMS-EI ( $m/z$ ):  $\text{M}^+$  calcd for  $\text{C}_{21}\text{H}_{31}\text{N}$ , 297.2457; found 297.2449.

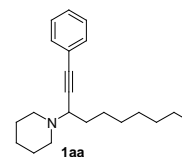

**1-(1-phenylundec-1-yn-3-yl)piperidine 1ab.**  $R_f = 0.44$  (EtOAc/hexane 1:9), Yield: 98%, brown oil.  $^1\text{H}$  NMR (300 MHz,  $\text{CDCl}_3$ , ppm,  $\delta$ ): 7.45–7.41 (m, 2H), 7.29–7.27 (m, 3H), 3.50–3.45 (dd,  $J_1 = 9.1$  Hz,  $J_2 = 8.3$  Hz, 1H), 2.72–2.66 (m, 2H), 2.64–2.48 (m, 2H), 1.73–1.54 (m, 10H), 1.35–1.24 (m, 10H), 0.90–0.85 (t,  $J = 6.2$  Hz, 3H);  $^{13}\text{C}$  NMR (75 MHz,  $\text{CDCl}_3$ , ppm,  $\delta$ ): 131.64, 128.08, 127.62, 123.59, 88.21, 85.60, 58.63, 50.45, 33.42, 31.82, 29.46, 29.38, 29.22, 26.88, 26.09, 24.53, 22.61,

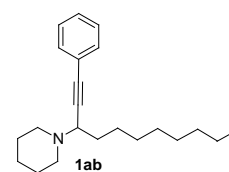

14.00; IR (KBr, thin film,  $\text{cm}^{-1}$ ): 2923, 2851, 2890, 1593, 1462, 1322, 1097, 754, 688; LRMS-EI ( $m/z$ ): 311 (0.2), 310 (0.3), 241 (6), 200 (1), 199 (14), 198 (100), 141 (1), 128 (2), 115 (9), 84 (1); HRMS-EI ( $m/z$ ):  $M^+$  calcd for  $\text{C}_{22}\text{H}_{33}\text{N}$ , 311.2613; found 311.2620.

**1-(1-phenyldodec-1-yn-3-yl)piperidine 1ac.**  $R_f = 0.44$  (EtOAc/hexane 1:9), Yield: 96%, pale yellow oil.  $^1\text{H}$  NMR (300 MHz,  $\text{CDCl}_3$ , ppm,  $\delta$ ): 7.45–7.42 (m, 2H), 7.31–7.27 (m, 3H), 3.49–3.44, (dd,  $J_1 = 9.3$  Hz,  $J_2 = 8.7$  Hz, 1H), 2.70–2.67 (m, 2H), 1.66–1.50 (m, 2H), 1.71–1.43 (m, 8H), 1.29–1.23 (m, 14H), 0.89–0.85 (t,  $J = 6.2$  Hz, 3H),  $^{13}\text{C}$  NMR (75 MHz,  $\text{CDCl}_3$ , ppm,  $\delta$ ): 131.67, 128.10, 127.61, 123.55, 88.07, 85.57, 58.55, 50.10, 33.38, 31.85, 29.50, 29.35, 29.25, 26.11, 24.52, 22.64, 14.05; IR (KBr, thin film,  $\text{cm}^{-1}$ ): 3049, 2928, 2791, 1684, 1593, 1486, 1462, 1316, 1155, 1097, 754, 688; LRMS-EI ( $m/z$ ): 325 (0.4), 324 (0.5), 228 (2), 221 (7), 199 (26), 198 (100), 178 (0.7), 128 (3), 115 (13), 91 (3); HRMS-EI ( $m/z$ ):  $M^+$  calcd for  $\text{C}_{23}\text{H}_{35}\text{N}$ , 325.2770; found 325.2780

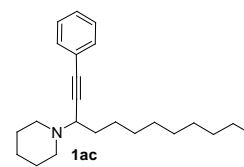

**1-(1,5-diphenylpent-1-yn-3-yl)piperidine 1ad.**  $R_f = 0.44$  (EtOAc/hexane 1:9), Yield: 97%, Brown oil.  $^1\text{H}$  NMR (300 MHz,  $\text{CDCl}_3$ , ppm,  $\delta$ ): 7.47–7.43 (m, 2H), 7.31–7.25 (m, 5H), 7.24–7.18 (m, 3H), 3.50–3.48 (dd,  $J_1 = 8.0$  Hz,  $J_2 = 7.6$  Hz, 1H), 2.87–2.67 (m, 4H), 2.51–2.47 (m, 2H), 2.08–2.03 (m, 2H), 1.65–1.63 (m, 4H), 1.47–1.44 (m, 2H);  $^{13}\text{C}$  NMR (75 MHz,  $\text{CDCl}_3$ , ppm,  $\delta$ ): 141.47, 131.47, 128.34, 128.05, 127.95, 127.55, 125.56, 123.24, 87.47, 86.88, 57.25, 50.23, 34.78, 32.61, 25.96, 24.40, IR (KBr, thin film,  $\text{cm}^{-1}$ ): 3021, 2923, 2851, 2802, 1696, 1489, 1454, 1322, 1152, 1100, 1031, 754, 691; LRMS-EI ( $m/z$ ): 303 (0.9), 242 (0.1), 215 (0.5), 199 (20), 198 (100), 141 (1), 128 (3), 115 (15), 91 (9); HRMS-EI ( $m/z$ ):  $M^+$  calcd for  $\text{C}_{22}\text{H}_{25}\text{N}$ , 303.1987; found 303.1984.

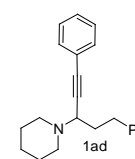

**1-(3-phenyl-1-(thiophen-2-yl)prop-2-yn-1-yl)piperidine 1ae.**  $R_f = 0.44$  (EtOAc/hexane 1:9), Yield: 91%, pale yellow solid, mp: 75–77 °C.  $^1\text{H}$  NMR (300 MHz,  $\text{CDCl}_3$ , ppm,  $\delta$ ): 7.27–7.23 (m, 3H), 7.22–7.17 (m, 5H), 6.97–6.94 (m, 1H), 4.98 (s, 1H), 2.52–2.48 (m, 4H), 1.59–1.51 (m, 4H), 1.40–1.36 (m, 2H);  $^{13}\text{C}$  NMR (100 MHz,  $\text{CDCl}_3$ , ppm,  $\delta$ ): 143.94, 131.81, 128.25, 128.18, 126.15, 125.83, 125.34, 122.97, 86.85, 85.25, 58.18, 50.55, 26.09, 24.37; IR (KBr, thin film,  $\text{cm}^{-1}$ ): 3060, 2928, 2802, 1593, 1485, 1437, 1316, 1275, 1155, 1094, 990, 951, 850, 760, 707; LRMS-EI ( $m/z$ ): 281 (25), 204 (2), 198 (19), 197 (100), 165 (3), 152 (5), 115 (3), 97 (0.5), 84 (1); HRMS-EI ( $m/z$ ):  $M^+$  calcd for  $\text{C}_{18}\text{H}_{19}\text{NS}$ , 281.1238; found 281.1234.

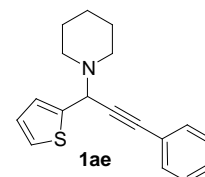

**1-(3-phenyl-1-(thiophen-3-yl)prop-2-yn-1-yl)piperidine 1af.**  $R_f = 0.44$  (EtOAc/hexane 1:9), Yield: 97%, brown oil.  $^1\text{H}$  NMR (300 MHz,  $\text{CDCl}_3$ , ppm,  $\delta$ ): 7.53–7.49 (m, 2H), 7.33–7.20 (m, 5H), 6.97–6.94 (m, 1H), 4.81 (s, 1H), 2.65–2.57 (m, 4H), 1.66–1.59 (m, 4H), 1.49–1.43 (m, 2H);  $^{13}\text{C}$  NMR (75 MHz,  $\text{CDCl}_3$ , ppm,  $\delta$ ): 140.25, 131.72, 128.19, 128.01, 127.75, 125.23, 123.08, 86.56, 86.15, 58.21, 50.49, 26.11, 24.38; IR (KBr, thin film,  $\text{cm}^{-1}$ ): 3058, 2846, 2802, 2741, 1593, 1489, 1440, 1314, 1283, 1152, 1086, 990, 909, 831, 751, 685; LRMS-EI ( $m/z$ ): 281 (30), 238 (2), 204 (2), 198 (31), 197 (100), 165 (3), 152 (5), 115 (4), 84 (5); HRMS-EI ( $m/z$ ):  $M^+$  calcd for  $\text{C}_{18}\text{H}_{19}\text{NS}$ , 281.1238; found 281.1230.

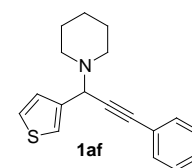

### General experimental procedure for manganese(II) chloride catalyzed three component coupling followed by 1,3-dipolar cycloaddition.

A mixture of aldehyde (1.0 mmol), (*S*)-azidomethylpyrrolidine (1.2 mmol), alkyne (1.5 mmol) and



MnCl<sub>2</sub> (10 mol%) in sealed tube was stirred without solvent for 12–14 h at 90 °C. The progress of reaction was monitored by TLC. After completion of reaction, the product was purified by column chromatography using *n*-hexane/EtOAc as eluent to give the desired product. The products were further identified by FT-IR, <sup>1</sup>H and <sup>13</sup>C NMR spectroscopy, and HRMS, and all data were all in good agreement with assigned structures. The characterization data of all triazoles are as follows.

**((4*S*,8*aS*)-3,4-diphenyl-4,6,7,8,8*a*,9-hexahydropyrrolo[1,2-*a*][1,2,3]triazolo[1,5-*d*]pyrazine 2a.** *R*<sub>f</sub> = 0.31 (EtOAc/hexane 3:7), Yield: 84%. Diastereomeric ratio: >99, [α]<sup>25</sup><sub>D</sub> –79.2° (*c* 1.0, CHCl<sub>3</sub>), Brown solid, mp: 198–199 °C. <sup>1</sup>H NMR (300 MHz, CDCl<sub>3</sub>, ppm, δ): 7.49–7.47 (d, *J* = 6.0 Hz, 2H), 7.32–7.30 (d, *J* = 6.0 Hz, 3H), 7.25–7.17 (m, 3H), 7.10–7.01 (m, 2H), 5.56 (s, 1H), 4.83–4.77 (m, 1H), 4.12–4.04 (t, *J* = 12.0 Hz, 1H), 3.25–3.22 (m, 1H), 2.96–2.92 (m, 1H), 2.38–2.25 (q, *J* = 9.0 Hz, 1H), 1.99–1.90 (m, 2H), 1.76–1.72 (m, 1H), 1.60–1.50 (m, 1H); <sup>13</sup>C NMR (100 MHz, CDCl<sub>3</sub>, ppm, δ): 141.92, 134.71, 130.83, 130.74, 129.23, 128.87, 128.33, 128.16, 127.9, 127.92, 127.41, 127.33, 126.20, 58.02, 51.67, 49.97, 48.63, 27.69, 21.92; IR (KBr, thin film, cm<sup>-1</sup>): 3056, 3027, 2950, 2876, 2808, 1493, 1448, 1127, 1007, 722, 696; LRMS-EI (*m/z*): 317 (80), 287 (20), 277 (23), 191 (22), 138 (69), 106 (100), 65 (39); HRMS-EI (*m/z*) M<sup>+</sup> calcd for C<sub>20</sub>H<sub>20</sub>N<sub>4</sub>, 316.1688; found 316.1681.

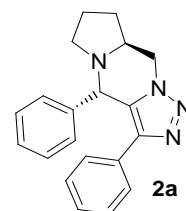

**(4*S*,8*aS*)-3-phenyl-4-*p*-tolyl-4,6,7,8,8*a*,9-hexahydropyrrolo[1,2-*a*][1,2,3]triazolo[1,5-*d*]pyrazine 2b.** *R*<sub>f</sub> = 0.31 (EtOAc/hexane 3:7), Yield: 83%. Diastereomeric ratio: >99, [α]<sup>25</sup><sub>D</sub> –78.3° (*c* 1.0, CHCl<sub>3</sub>), Brown solid, mp: 121–122 °C. <sup>1</sup>H NMR (300 MHz, CDCl<sub>3</sub>, ppm, δ): 7.51–7.49 (d, *J* = 6.0 Hz, 2H), 7.24–7.18 (m, 3H), 7.14–7.11 (m, 2H), 6.92–6.89 (d, *J* = 9.0 Hz, 2H), 5.53 (s, 1H), 4.83–4.77 (dd, *J*<sub>1</sub> = 6.0, *J*<sub>2</sub> = 12.0 Hz, 1H), 4.11–4.04 (t, *J* = 10.0 Hz, 1H), 3.27–3.17 (m, 1H), 2.97–2.91 (m, 1H), 2.41–2.35 (m, 1H), 2.31 (s, 3H), 2.04–1.89 (m, 2H), 1.64–1.56 (m, 2H); <sup>13</sup>C NMR (75 MHz, CDCl<sub>3</sub>, ppm, δ): 141.91, 137.98, 131.70, 131.04, 130.98, 129.25, 129.08, 128.38, 127.34, 126.30, 57.84, 51.80, 50.04, 48.64, 27.79, 21.99, 21.05; IR (KBr, thin film, cm<sup>-1</sup>): 3059, 2953, 285, 1607, 1449, 1358, 1161, 1007, 771, 696; LRMS-EI (*m/z*): 331 (70), 281 (38), 216 (40), 207 (45), 126 (100), 105 (24), 65 (15); HRMS-EI (*m/z*): M<sup>+</sup> calcd for C<sub>21</sub>H<sub>22</sub>N<sub>4</sub>, 330.1844; found 330.1848.

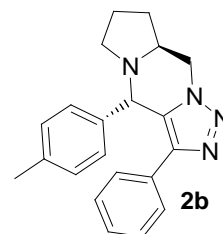

**(4*S*,8*aS*)-3-phenyl-4-*m*-tolyl-4,6,7,8,8*a*,9-hexahydropyrrolo[1,2-*a*][1,2,3]triazolo[1,5-*d*]pyrazine 2c.** *R*<sub>f</sub> = 0.31 (EtOAc/hexane 3:7) Yield: 81%, Diastereomeric ratio: >99; [α]<sup>25</sup><sub>D</sub> –75.2 °C (*c* 1.0, CHCl<sub>3</sub>); Brown solid, mp: 218–219 °C. <sup>1</sup>H NMR (300 MHz, CDCl<sub>3</sub>, ppm, δ): 7.50–7.47 (d, *J* = 9.0 Hz, 2H), 7.24–7.19 (m, 4H), 7.12–7.09 (d, *J* = 9.0 Hz, 1H), 6.85–6.79 (m, 2H), 5.52 (s, 1H), 4.83–4.77 (dd, *J*<sub>1</sub> = 6.0 Hz, *J*<sub>2</sub> = 12.0 Hz, 1H), 4.12–4.04 (t, *J* = 12.0 Hz, 1H), 3.29–3.20 (m, 1H), 2.96–2.90 (m, 1H), 2.43–2.34 (m, 1H), 2.30 (s, 3H), 2.04–1.88 (m, 2H), 1.65–1.56 (m, 2H); <sup>13</sup>C NMR (75 MHz, CDCl<sub>3</sub>, ppm, δ): 141.93, 138.03, 130.92, 130.89, 129.72, 128.95, 128.32, 127.29, 126.49, 126.26, 58.02, 51.65, 50.02, 48.68, 27.77, 21.94, 21.40; IR (KBr, thin film, cm<sup>-1</sup>): 3060, 2916, 2854, 1487, 1406, 1235, 1160, 1071, 1007, 800, 771, 692; LRMS-EI (*m/z*): 331 (79), 281 (29), 207 (29), 140 (38), 126 (93), 105 (100), 65 (26); HRMS-EI (*m/z*): M<sup>+</sup> calcd for C<sub>21</sub>H<sub>22</sub>N<sub>4</sub>, 330.1844; found 330.1849.

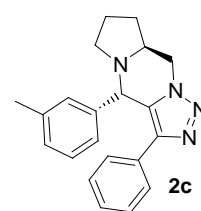

**(4*S*,8*aS*)-3-phenyl-4-*o*-tolyl-4,6,7,8,8*a*,9-hexahydropyrrolo[1,2-*a*][1,2,3]triazolo[1,5-*d*]pyrazine 2d.** *R*<sub>f</sub> = 0.31 (EtOAc/hexane 3:7) Yield: 79%. Diastereomeric ratio: >99; [α]<sup>25</sup><sub>D</sub> –73.4° (*c* 1.0, CHCl<sub>3</sub>), Pale yellow gum. <sup>1</sup>H NMR (300 MHz, CDCl<sub>3</sub>, ppm, δ): 7.40–7.37 (d, *J* = 6.4 Hz, 2H), 7.25–7.15 (m, 5H), 7.04–6.99 (t, *J* = 7.8 Hz, 1H), 6.55–6.53 (d, *J* = 9.0 Hz, 1H), 5.72 (s, 1H), 4.73–4.68 (dd, *J*<sub>1</sub> = 6.0, *J*<sub>2</sub> = 12 Hz, 1H), 4.09–4.02 (t, *J* = 12 Hz, 1H), 3.46–3.42 (m, 1H), 2.92–2.89 (m, 1H), 2.63–2.58 (m,

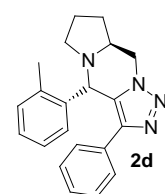

1H), 2.55 (s, 3H), 2.02–1.83 (m, 2H), 1.68–1.59 (m, 2H); <sup>13</sup>C NMR (100 MHz, CDCl<sub>3</sub>, ppm, δ): 142.30, 136.97, 135.24, 131.01, 130.92, 130.42, 128.44, 128.29, 128.11, 127.40, 126.10, 125.93, 53.49, 49.89, 49.05, 48.29, 27.95, 21.75, 19.53; IR (KBr, thin film, cm<sup>-1</sup>): 3059, 2953, 285, 1607, 1449, 1358, 1161, 1007, 771, 696; LRMS-EI (*m/z*): 331 (80), 281 (25), 207 (30), 140 (39), 126 (95), 105 (100), 65 (27); HRMS-EI (*m/z*): M<sup>+</sup> calcd for C<sub>21</sub>H<sub>22</sub>N<sub>4</sub>, 330.1844; found 330.1846.

**(4*S*,8*aS*)-4-(4-methoxyphenyl)-3-phenyl-4,6,7,8,8*a*,9-hexahydropyrrolo[1,2-*a*][1,2,3]triazolo[1,5-*d*]pyrazine 2e.**

*R*<sub>f</sub> = 0.21 (EtOAc/hexane 3:7) Yield: 76%; Diastereomeric ratio: >99, [α]<sup>25</sup><sub>D</sub> -73.6° (*c* 1.0, CHCl<sub>3</sub>), Brown solid, mp: 204–205 °C. <sup>1</sup>H NMR (300 MHz, CDCl<sub>3</sub>, ppm, δ): 7.50–7.48 (d, *J* = 6.0 Hz, 2H), 7.23–7.21 (m, 3H), 6.95–6.92 (m, 2H), 6.84–6.81 (m, 2H), 5.52 (s, 1H), 4.82–4.76 (dd, *J*<sub>1</sub> = 12.4 Hz, *J*<sub>2</sub> = 12 Hz, 1H), 4.09–4.02 (t, *J* = 12.0 Hz, 1H), 3.76 (s, 3H), 3.22–3.17 (m, 1H), 2.96–2.90 (m, 1H), 2.40–2.32 (q, *J* = 6.0 Hz, 1H), 1.75–1.71 (m, 2H), 1.64–1.59 (m, 2H); <sup>13</sup>C NMR (75 MHz, CDCl<sub>3</sub>, ppm, δ): 159.31, 141.85, 131.14, 130.97, 130.51, 128.39, 127.35, 126.91, 126.30, 113.70, 57.48, 55.16, 51.81, 50.02, 48.60, 27.77, 21.99; IR (KBr, thin film, cm<sup>-1</sup>): 2929, 2832, 1606, 1508, 1459, 1252, 1173, 1034, 807, 700; LRMS-EI (*m/z*): 347 (78), 317 (26), 281 (32), 221 (27), 207 (41), 140 (40), 126 (99), 105 (100), 65 (41); HRMS-EI (*m/z*): M<sup>+</sup> calcd for C<sub>21</sub>H<sub>22</sub>N<sub>4</sub>O, 346.1794; found 346.1797.

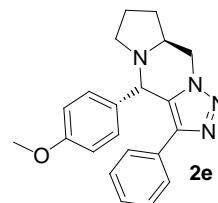

**(4*S*,8*aS*)-4-(3-bromophenyl)-3-phenyl-4,6,7,8,8*a*,9-hexahydropyrrolo[1,2-*a*][1,2,3]triazolo[1,5-*d*]pyrazine 2f.**

*R*<sub>f</sub> = 0.31 (EtOAc/hexane 3:7) Yield: 77%; Diastereomeric ratio: >99, [α]<sup>25</sup><sub>D</sub> -74.4° (*c* 1.0, CHCl<sub>3</sub>), Brown solid, mp: 206–207 °C. <sup>1</sup>H NMR (300 MHz, CDCl<sub>3</sub>, ppm, δ): 7.50–7.41 (m, 3H), 7.30–7.17 (m, 5H), 6.95–6.92 (d, *J* = 9.0 Hz, 1H), 5.53 (s, 1H), 4.80–4.74 (dd, *J* = 12.0, 3.0 Hz, 1H), 4.12–4.04 (t, *J* = 12.0 Hz, 1H), 3.19–3.26 (m, 1H), 2.97–2.90 (m, 1H), 2.47–2.38 (m, 1H), 2.06–1.90 (m, 2H), 1.56 (m, 2H); <sup>13</sup>C NMR (75 MHz, CDCl<sub>3</sub>, ppm, δ): 142.37, 137.54, 131.90, 131.47, 130.74, 129.98, 129.88, 128.55, 127.70, 127.64, 126.31, 122.86, 57.60, 51.29, 50.23, 48.86, 27.89, 22.04; IR (KBr, thin film, cm<sup>-1</sup>): 3060, 2935, 2839, 1568, 1471, 1234, 1159, 1073, 1106, 791, 720; LRMS-EI (*m/z*): 395 (22), 341 (18), 325 (27), 227 (80), 207 (50), 166 (46), 126 (100), 105 (37), 95 (38), 65 (28); HRMS-EI (*m/z*): M<sup>+</sup> calcd for C<sub>20</sub>H<sub>19</sub>BrN<sub>4</sub>, 394.0793; found 394.0795.

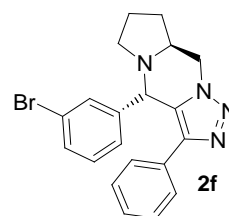

**(4*S*,8*aS*)-4-(4-fluorophenyl)-3-phenyl-4,6,7,8,8*a*,9-hexahydropyrrolo[1,2-*a*][1,2,3]triazolo[1,5-*d*]pyrazine 2g.**

*R*<sub>f</sub> = 0.31 (EtOAc/hexane 3:7) Yield: 79%. Diastereomeric ratio: >99, [α]<sup>25</sup><sub>D</sub> -98.4° (*c* 1.0, CHCl<sub>3</sub>), Brown solid, mp: 194–195 °C. <sup>1</sup>H NMR (300 MHz, CDCl<sub>3</sub>, ppm, δ): 7.49–7.46 (d, *J* = 9.0 Hz, 2H), 7.24–7.21 (m, 3H), 7.19–6.98 (m, 4H), 5.56 (s, 1H), 4.80–4.74 (dd, *J*<sub>1</sub> = 11.4 Hz, *J*<sub>2</sub> = 12.0 Hz, 1H), 4.10–4.03 (t, *J* = 12.0 Hz, 1H), 3.21–3.14 (m, 1H), 2.96–2.89 (m, 1H), 2.41–2.33 (q, *J* = 6.0 Hz, 1H), 2.00–1.90 (m, 2H), 1.77–1.72 (m, 1H), 1.65–1.57 (m, 1H); <sup>13</sup>C NMR (75 MHz, CDCl<sub>3</sub>, ppm, δ): 162.36 (d, *J* = 247 Hz), 142.05, 130.88 (d, *J* = 4.3 Hz), 130.78 (d, *J* = 4.3 Hz), 130.54, 128.44, 127.50, 126.23, 115.38 (d, *J* = 21.6 Hz), 57.33, 51.49, 50.07, 48.65, 27.78, 21.98; IR (KBr, thin film, cm<sup>-1</sup>): 3054, 2950, 2806, 1611, 1588, 1441, 1239, 1133, 1006, 795, 694; LRMS-EI (*m/z*): 235 (46), 281 (36), 249 (40), 230 (88), 228 (100), 166 (40), 126 (98), 105 (61), 51 (69); HRMS-EI (*m/z*): M<sup>+</sup> calcd for C<sub>20</sub>H<sub>19</sub>FN<sub>4</sub>, 334.1594; found 334.1597.

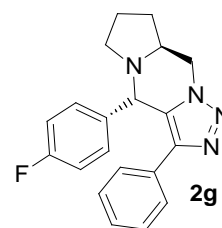

**(4*S*,8*aS*)-4-(3-fluorophenyl)-3-phenyl-4,6,7,8,8*a*,9-hexahydropyrrolo[1,2-*a*][1,2,3]triazolo[1,5-*d*]pyrazine 2h.**

*R*<sub>f</sub> = 0.31 (EtOAc/hexane 3:7) Yield: 77%; Diastereomeric ratio: >99, [α]<sup>25</sup><sub>D</sub> -83.2° (*c* 1.0, CHCl<sub>3</sub>). Brown solid, mp: 188–189 °C. <sup>1</sup>H NMR (300 MHz, CDCl<sub>3</sub>, ppm, δ): 7.50–7.48 (d, *J* = 6.0 Hz, 2H),

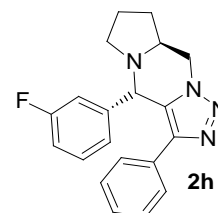

7.33–7.18 (m, 4H), 7.21–7.00 (t,  $J = 6.0$  Hz, 1H), 6.97–6.79 (t,  $J = 6.0$  Hz, 2H), 5.56 (s, 1H), 4.80–4.74 (dd,  $J_1 = 11.4$ ,  $J_2 = 12.0$  Hz, 1H), 4.12–4.04 (t,  $J = 12.0$  Hz, 1H), 3.26–3.23 (m, 1H), 2.95–2.94 (m, 1H), 2.44–2.41 (q,  $J = 9.0$  Hz, 1H), 2.02–1.91 (m, 2H), 1.80–1.60 (m, 2H),  $^{13}\text{C}$  NMR (75 MHz,  $\text{CDCl}_3$ , ppm,  $\delta$ ): 162.7, (d,  $J = 246$  Hz), 142.27, 137.6 (d,  $J = 23.76$  Hz), 130.3 (d,  $J = 52.6$ ), 129.98, 128.46, 127.55, 126.25, 124.7 (d,  $J = 2.9$  Hz), 116.0 (d,  $J = 21.3$  Hz), 115.2 (d,  $J = 21$  Hz), 57.64, 51.33, 50.24, 48.81, 27.85, 22.01 ; IR (KBr, thin film,  $\text{cm}^{-1}$ ): 3054, 2950, 2806, 1611, 1588, 1441, 1239, 1133, 1006, 795, 694; LRMS-EI ( $m/z$ ): 335 (51), 281 (31), 222 (25), 126 (100), 108 (30), 105 (70), 65 (22); HRMS-EI ( $m/z$ ):  $\text{M}^+$  calcd for  $\text{C}_{20}\text{H}_{19}\text{FN}_4$ , 334.1594; found 334.1595.

**3-((4S,8aS)-3-phenyl-4,6,7,8,8a,9-hexahydropyrrolo[1,2-a][1,2,3]triazolo[1,5-d]pyrazin-4-yl)benzonitrile 2i.**

$R_f = 0.21$  (EtOAc/hexane 3:7), Yield: 75%. Diastereomeric ratio: >99,  $[\alpha]_D^{25} -73.2^\circ$  ( $c$  1.0,  $\text{CHCl}_3$ ), Brown solid, mp: 198–199 °C.  $^1\text{H}$  NMR (300 MHz,  $\text{CDCl}_3$ , ppm,  $\delta$ ): 7.59–7.57 (d,  $J = 6.0$  Hz, 1H), 7.48–7.45 (m, 2H), 7.42–7.39 (m, 2H), 7.29–7.20 (m, 4H), 5.62 (s, 1H), 4.78–4.72 (dd,  $J = 15.0, 6.0$  Hz, 1H), 4.13–4.05 (t,  $J = 12.0$  Hz, 1H), 3.24–3.14 (m, 1H), 2.98–2.91 (m, 1H), 2.47–2.41 (m, 1H), 2.07–1.92 (m, 2H), 1.69–1.56 (m, 2H);  $^{13}\text{C}$  NMR (75 MHz,  $\text{CDCl}_3$ , ppm,  $\delta$ ): 142.54, 137.14, 133.00, 132.30, 130.50, 129.34, 129.09, 128.61, 127.80, 126.16, 118.27, 112.81, 57.37, 50.74, 50.36, 48.90, 27.85, 21.98; IR (KBr, thin film,  $\text{cm}^{-1}$ ): 3054, 2954, 2834, 1606, 1496, 1448, 1234, 1157, 1007, 761, 695; LRMS-EI ( $m/z$ ): 365 (100), 342 (23), 281 (20), 126 (45), 105 (30), 85 (20), 67 (48); HRMS-EI ( $m/z$ ):  $\text{M}^+$  calcd for  $\text{C}_{21}\text{H}_{19}\text{N}_5$ , 341.1640; found 341.1636.

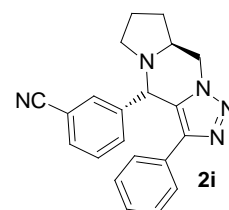

**(4S,8aS)-4-(4-chlorophenyl)-3-phenyl-4,6,7,8,8a,9-hexahydropyrrolo[1,2-a][1,2,3]triazolo[1,5-d]pyrazine 2j.**

$R_f = 0.31$  (EtOAc/hexane 3:7), Yield: 82%; Distereomeric ratio: >99,  $[\alpha]_D^{25} -79.2^\circ$  ( $c$  1.0,  $\text{CHCl}_3$ ). Pale yellow solid, mp: 189–190 °C.  $^1\text{H}$  NMR (300 MHz,  $\text{CDCl}_3$ , ppm,  $\delta$ ): 7.49–7.48 (d,  $J = 3.8$  Hz, 2H), 7.30–7.23 (m, 5H), 6.98–6.94 (m 2H), 5.56 (s, 1H), 4.80–4.73 (dd,  $J_1 = 11.4$  Hz,  $J_2 = 15.1$  Hz, 1H), 4.10–4.03 (t,  $J = 15.0$  Hz, 1H), 3.21–3.15 (m, 1H), 2.92–2.90 (m, 1H) 2.42–2.35 (q,  $J = 6.0$  Hz, 1H), 2.04–1.91 (m, 2H), 1.88–1.80 (m, 2H);  $^{13}\text{C}$  NMR (75 MHz,  $\text{CDCl}_3$ , ppm,  $\delta$ ): 142.16 134.16, 133.55, 130.73, 130.35, 130.15, 128.63, 128.45, 128.05, 127.59, 126.24, 57.37, 51.38, 50.11, 48.73, 27.88, 22.06; IR(KBr, thin film,  $\text{cm}^{-1}$ ): 3060, 2912, 2808, 1591, 1486, 1234, 1157, 1083, 1006, 801, 770, 691 ; LRMS-EI ( $m/z$ ): 350 (0.8), 322 (39), 321 (100), 239 (16), 225 (18), 193 (35), 165 (16), 130 (22), 91 (22), 77 (12); HRMS-EI ( $m/z$ ):  $\text{M}^+$  calcd for  $\text{C}_{20}\text{H}_{19}\text{ClN}_4$ , 350.1298; found 350.1300.

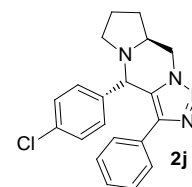

**(4S,8aS)-4-(3-chlorophenyl)-3-phenyl-4,6,7,8,8a,9-hexahydropyrrolo[1,2-a][1,2,3]triazolo[1,5-d]pyrazine 2k.**

$R_f = 0.31$  (EtOAc/hexane 3:7), Yield: 79%; Distereomeric ratio: >99;  $[\alpha]_D^{25} -74.2^\circ$  ( $c$  1.0,  $\text{CHCl}_3$ ); Pale yellow solid, mp: 193–194 °C.  $^1\text{H}$  NMR (300 MHz,  $\text{CDCl}_3$ , ppm,  $\delta$ ): 7.50–7.47 (m, 2H), 7.30–7.19 (m, 5H), 7.05 (s, 1H), 6.91–6.89 (d,  $J = 6.0$  Hz, 1H), 5.54 (s, 1H), 4.81–4.74 (dd,  $J_1 = 13.4$  Hz,  $J_2 = 13.9$  Hz, 1H), 4.11–4.04 (t,  $J = 12.0$  Hz, 1H), 3.23–3.21 (m, 1H), 2.43–2.41 (q,  $J = 6.0$  Hz, 1H), (m, 1H), 2.04–1.97 (m, 2H), 1.80–1.62 (m, 2H);  $^{13}\text{C}$  NMR (75 MHz,  $\text{CDCl}_3$ , ppm,  $\delta$ ): 142.25, 137.17, 134.54, 130.65, 129.87, 129.64, 128.94, 128.48, 127.52, 127.23, 126.52, 57.54, 51.25, 50.18, 48.76, 27.83, 21.97; IR(KBr, thin film,  $\text{cm}^{-1}$ ): 3054, 2923, 2824, 1665, 1572, 1473, 1234, 1163, 1080, 1004, 770, 696; LRMS-EI ( $m/z$ ): 350 (12), 323 (39), 321 (100), 225 (18), 193 (24), 192 (20), 138 (13), 130 (29), 125 (8), 91 (10); HRMS-EI ( $m/z$ ):  $\text{M}^+$  calcd for  $\text{C}_{20}\text{H}_{19}\text{ClN}_4$ , 350.1298; found 350.1293.

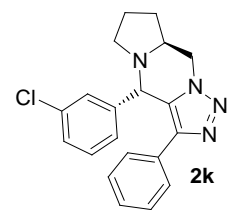

**(4S,8aS)-4-(2-chlorophenyl)-3-phenyl-4,6,7,8,8a,9-hexahydropyrrolo[1,2-a][1,2,3]triazolo[1,5-d]**

**pyrazine 2l.**  $R_f = 0.31$  (EtOAc/hexane 3:7), Yield: 76%. Distereomeric ratio: >99,  $[\alpha]_D^{25} -72.2^\circ$  ( $c$  1.0,  $\text{CHCl}_3$ ), Pale yellow solid, mp: 187–188 °C.  $^1\text{H NMR}$  (300 MHz,  $\text{CDCl}_3$ , ppm,  $\delta$ ): 7.50–7.47 (m, 2H), 7.29–7.21 (m, 5H), 7.05 (s, 1H), 6.91–6.89 (d,  $J = 6.0$  Hz, 1H), 5.54 (s, 1H), 4.81–4.75 (dd,  $J = 11.0$  Hz,  $J = 15.0$  Hz, 1H), 4.11–4.04 (t,  $J = 9.0$  Hz, 1H), 3.25–3.21 (m, 1H), 2.94–2.91 (m, 1H), 2.43–2.40 (q,  $J = 9.0$  Hz, 1H), 2.00–1.92 (m, 2H), 1.80–1.60 (m, 2H);  $^{13}\text{C NMR}$  (100 MHz,  $\text{CDCl}_3$ , ppm,  $\delta$ ): 142.01, 135.08, 133.34, 130.07, 129.91, 129.62, 128.50, 127.61, 127.52, 126.85, 125.99, 54.00, 51.12, 50.36, 48.28, 27.59, 22.00; IR (KBr, thin film,  $\text{cm}^{-1}$ ): 3060, 2912, 2857, 1588, 1487, 1234, 1160, 1083, 1001, 798, 688; H LRMS-EI ( $m/z$ ): 350 (19), 321 (100), 287 (81), 239 (15), 225 (27), 193 (42), 165 (27), 130 (40), 91 (24); RMS-EI ( $m/z$ ):  $M^+$  calcd for  $\text{C}_{20}\text{H}_{19}\text{ClN}_4$ , 350.1298; found 350.1306.

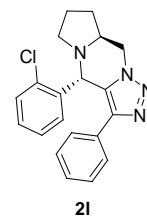

**4*S*,8*aS*)-4-(naphthalen-1-yl)-3-phenyl-4,6,7,8,8*a*,9-hexahydropyrrolo[1,2-*a*][1,2,3]triazolo[1,5-*d*]pyrazine 2m.**  $R_f = 0.31$  (EtOAc/hexane 3:7), Yield: 81%. Distereomeric ratio: >99,  $[\alpha]_D^{25} -62.2^\circ$  ( $c$  1.0,  $\text{CHCl}_3$ ), brown solid, mp: 116–117 °C.  $^1\text{H NMR}$  (300 MHz,  $\text{CDCl}_3$ , ppm,  $\delta$ ): 8.34–8.31 (d,  $J = 9.0$  Hz, 1H), 7.94–7.91 (d,  $J = 9.0$  Hz, 1H), 7.81–7.79 (d,  $J = 6.0$  Hz, 1H), 7.67–7.55 (m, 3H), 7.42–7.39 (m, 2H), 7.29–7.09 (m, 1H), 7.09–7.07 (m, 2H), 6.76–6.73 (d,  $J = 9.0$  Hz, 1H), 6.42 (s, 1H), 4.78–4.72 (dd,  $J_1 = 12.0$  Hz,  $J_2 = 15.0$  Hz, 1H), 4.72–4.13 (t,  $J = 10.8$  Hz, 1H), 3.50–3.45 (m, 1H), 2.95–2.93 (m, 1H), 2.59–2.56 (q,  $J = 6.0$  Hz, 1H), 1.94–1.61 (m, 4H);  $^{13}\text{C NMR}$  (75 MHz,  $\text{CDCl}_3$ , ppm,  $\delta$ ): 142.38, 133.85, 132.71, 132.06, 130.84, 130.30, 129.12, 128.43, 127.91, 127.30, 126.68, 126.61, 124.85, 123.13, 53.22, 50.19, 49.31, 28.08, 22.01; IR (KBr, thin film,  $\text{cm}^{-1}$ ): 3049, 2950, 2862, 1684, 1445, 1363, 1234, 1155, 1006, 776, 694; LRMS-EI ( $m/z$ ): 366 (31), 337 (100), 268 (17), 239 (42), 208 (86), 180 (44), 115 (19), 91 (21); HRMS-EI ( $m/z$ ):  $M^+$  calcd for  $\text{C}_{24}\text{H}_{22}\text{N}_4$  366.1844; found 366.1850.

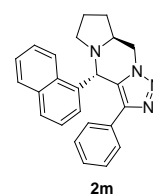

**(4*S*,8*aS*)-3-(4-methoxyphenyl)-4-phenyl-4,6,7,8,8*a*,9-hexahydropyrrolo[1,2-*a*][1,2,3]triazolo[1,5-*d*]pyrazine 2n.**

$R_f = 0.21$  (EtOAc/hexane 3:7), Yield: 83%. Distereomeric ratio: >99,  $[\alpha]_D^{25} -74.2^\circ$  ( $c$  1.0,  $\text{CHCl}_3$ ), Pale yellow solid, mp: 207–208 °C.  $^1\text{H NMR}$  (300 MHz,  $\text{CDCl}_3$ , ppm,  $\delta$ ): 7.40–7.31 (m, 4H), 7.12 (s, 1H), 7.03–7.00 (d,  $J = 9.0$  Hz, 2H), 6.77–6.75 (m, 2H), 5.52 (s, 1H), 4.80–4.75 (dd,  $J_1 = 15.0$  Hz,  $J_2 = 12.0$  Hz, 1H), 4.10–4.03 (t,  $J = 12.0$  Hz, 1H), 3.74 (s, 3H), 3.25–3.21 (m, 1H), 2.97–2.94 (m, 1H), 2.38–2.31 (q,  $J = 12.0$  Hz, 1H), 1.99–1.87 (m, 2H), 1.81–1.71 (m, 1H), 1.65–1.60 (m, 1H);  $^{13}\text{C NMR}$  (75 MHz,  $\text{CDCl}_3$ , ppm,  $\delta$ ): 158.92, 141.91, 134.96, 129.94, 129.26, 128.35, 128.16, 127.56, 113.81, 58.04, 55.09, 51.64, 50.08, 48.67, 27.74, 21.97; IR (KBr, thin film,  $\text{cm}^{-1}$ ): 3025, 2939, 2829, 1610, 1506, 1456, 1245, 1176, 1028, 836, 702, 606; LRMS-EI ( $m/z$ ): 346 (4), 317 (100), 221 (8), 159 (16), 130 (7), 104 (12), 91 (8); HRMS-EI ( $m/z$ ):  $M^+$  calcd for  $\text{C}_{21}\text{H}_{22}\text{N}_4\text{O}$ , 346.1794; found 346.1786.

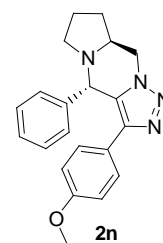

**(4*S*,8*aS*)-3-butyl-4-phenyl-4,6,7,8,8*a*,9-hexahydropyrrolo[1,2-*a*][1,2,3]triazolo[1,5-*d*]pyrazine 2o.** Yield 74%.  $R_f = 0.31$  (EtOAc/hexane 3:7), Diastereomeric ratio: >99,  $[\alpha]_D^{25} -74.2^\circ$  ( $c$  1.0,  $\text{CHCl}_3$ ), Pale yellow gum.  $^1\text{H NMR}$  (300 MHz,  $\text{CDCl}_3$ , ppm,  $\delta$ ): 7.24–7.22 (m, 3H), 6.92–6.89 (m, 2H), 5.24 (s, 1H), 4.71–4.65 (dd,  $J_1 = 6.0$  Hz,  $J_2 = 15.0$  Hz, 1H), 3.86–3.94 (t,  $J = 12.0$  Hz, 1H), 3.12–3.21 (m, 1H), 2.84–2.89 (m, 1H), 2.11–2.30 (m, 3H), 1.76–1.95 (m, 2H), 1.61–1.68 (m, 1H), 1.48–1.56 (m, 1H), 1.19–1.36 (m, 2H), 1.03–1.11 (m, 2H), 0.63–0.68 (t,  $J = 9.0$  Hz, 3H);  $^{13}\text{C NMR}$  (75 MHz,  $\text{CDCl}_3$ , ppm,  $\delta$ ): 143.15, 135.74, 130.95, 129.22, 128.26, 128.20, 57.44, 51.82, 51.14, 48.41, 30.44, 27.52, 24.40, 21.14, 22.01, 13.61; IR (KBr, thin film,  $\text{cm}^{-1}$ ): 2955, 2871, 1453, 1228, 1157, 1080, 705; LRMS-EI ( $m/z$ ): 297 (31), 138 (79), 126 (39), 105 (100), 65 (54); HRMS-EI ( $m/z$ ):  $M^+$  calcd for  $\text{C}_{18}\text{H}_{24}\text{N}_4$ , 296.2001; found 296.2007.

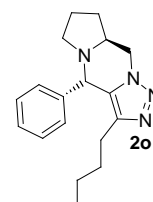

**(4*S*,8*aS*)-4-phenethyl-3-phenyl-4,6,7,8,8*a*,9-hexahydropyrrolo[1,2-*a*][1,2,3]triazolo[1,5-*d*]pyrazine 2p.**  $R_f = 0.31$  (EtOAc/hexane 3:7), Yield 77%. Diastereomeric ratio: >99,  $[\alpha]^{25}_D -81.2^\circ$  ( $c$  1.0, CHCl<sub>3</sub>), Pale yellow solid, mp: 178–179 °C. <sup>1</sup>H NMR (300 MHz, CDCl<sub>3</sub>, ppm,  $\delta$ ): 7.52–7.50 (m, 2H), 7.34–7.29 (m, 6H), 7.14–7.11 (m, 2H), 4.39–4.28 (m, 2H), 3.96–3.88 (t,  $J = 9.0$  Hz, 1H), 3.76–3.69 (m, 1H), 3.13–3.07 (m, 1H), 2.83–2.69 (m, 3H), 2.25–2.18 (m, 1H), 2.09–2.03 (m, 1H), 1.89–1.87 (m, 2H), 1.58, (bs, 2H); <sup>13</sup>C NMR (75 MHz, CDCl<sub>3</sub>, ppm,  $\delta$ ): 142.11, 141.04, 131.45, 130.93, 128.81, 128.64, 128.38, 127.45, 126.23, 126.09, 51.85, 50.11, 49.71, 44.81, 34.69, 32.43, 29.68, 28.49, 21.44; IR (KBr, thin film, cm<sup>-1</sup>): 3024, 2923, 2823, 1604, 1495, 1428, 1345, 1130, 1006, 759, 709; LRMS-EI ( $m/z$ ): 345 (39), 227 (25), 281 (36), 249 (25), 228 (66), 207 (40), 166 (38), 126 (100), 105 (94); HRMS-EI ( $m/z$ ):  $M^+$  calcd for C<sub>22</sub>H<sub>24</sub>N<sub>4</sub>, 344.2001; found 344.2001.

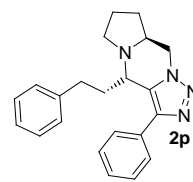

**(4*S*,8*aS*)-4-isobutyl-3-phenyl-4,6,7,8,8*a*,9-hexahydropyrrolo[1,2-*a*][1,2,3]triazolo[1,5-*d*]pyrazine 2q.**

$R_f = 0.31$  (EtOAc/hexane 3:7), Yield: 76%. Brown gum, Diastereomeric ratio: 96:4,  $[\alpha]^{25}_D -81.2^\circ$  ( $c$  1.0, CHCl<sub>3</sub>). <sup>1</sup>H NMR (CDCl<sub>3</sub>, 300 MHz, ppm,  $\delta$ ): 7.69–7.67 (d,  $J = 6.0$  Hz, 2H), 7.39–7.20 (m, 3H), 4.46–4.41 (m, 1H), 4.29–4.25 (m, 1H), 2.86–3.81 (t,  $J = 9.0$  Hz, 1H), 3.45–3.20 (m, 1H), 3.10–3.02 (m, 1H), 2.70–2.62 (q,  $J = 9.0$  Hz, 1H), 1.90–1.81 (m, 3H), 1.64–1.46 (m, 2H), 1.25–1.16 (m, 2H), 0.89–0.87 (d,  $J = 6.0$  Hz, 3H), 0.78–0.75 (d,  $J = 9.0$  Hz, 3H); <sup>13</sup>C NMR (75 MHz, CDCl<sub>3</sub>, ppm,  $\delta$ ): 142.15, 131.68, 131.46, 128.59, 127.53, 126.49, 51.67, 49.81, 44.74, 42.44, 28.55, 24.87, 23.29, 21.37, 21.17; IR (KBr, thin film, cm<sup>-1</sup>): 3054, 2950, 2862, 1687, 1443, 1336, 1259, 1138, 1006, 765, 696; LRMS-EI ( $m/z$ ): 296 (0.2), 240 (17), 239 (100), 211 (6), 183 (4), 142 (38), 138 (12), 115 (6), 91 (19); HRMS-EI ( $m/z$ ):  $M^+$  calcd for C<sub>18</sub>H<sub>24</sub>N<sub>4</sub>, 296.2001; found 296.1996

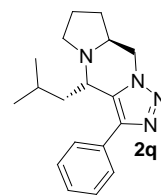

**(4*S*,8*aS*)-3-phenyl-4-propyl-4,6,7,8,8*a*,9-hexahydropyrrolo[1,2-*a*][1,2,3]triazolo[1,5-*d*]pyrazine (2r).**

$R_f = 0.31$  (EtOAc/hexane 3:7), Yield: 75%. Pale yellow gum; Diastereomeric ratio: 94:6,  $[\alpha]^{25}_D -69.4^\circ$  ( $c$  1.0, CHCl<sub>3</sub>). <sup>1</sup>H NMR (300 MHz, CDCl<sub>3</sub>, ppm,  $\delta$ ): 7.74–7.71 (d,  $J = 9.0$  Hz, 2H), 7.44–7.40 (t,  $J = 6.0$  Hz, 2H), 7.27–7.32 (t,  $J = 6.0$  Hz, 1H), 4.47–4.40 (m, 1H), 4.37–4.33 (dd,  $J = 6.0, 9.0$  Hz, 1H), 3.95–3.87 (dd,  $J_1 = 15, J_2 = 9.0$  Hz, 1H), 3.63–3.57 (m, 1H), 3.06–3.03 (m, 1H), 2.77–2.72 (q,  $J = 6.0$  Hz, 1H), 2.21–2.16 (m, 1H), 1.96–1.92 (m, 3H), 1.69–1.64 (m, 1H), 1.52–1.38 (m, 3H), 0.86–0.82 (t,  $J = 6.0$  Hz, 3H); <sup>13</sup>C NMR (75 MHz, CDCl<sub>3</sub>, ppm,  $\delta$ ): 142.24, 131.81, 131.53, 128.68, 127.53, 53.35, 50.36, 49.89, 45.83, 35.30, 28.56, 21.60, 20.15, 13.61; IR (KBr, thin film, cm<sup>-1</sup>): 3055, 2957, 2872, 2242, 1607, 149, 1237, 1141, 1008, 731; LRMS-EI ( $m/z$ ): 283 (100), 239 (25), 138 (51), 106 (21), 67 (50); HRMS-EI ( $m/z$ ):  $M^+$  calcd for C<sub>17</sub>H<sub>22</sub>N<sub>4</sub>, 282.1844; found 282.1840.

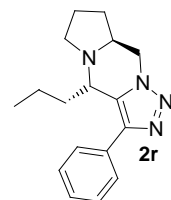

**(4*R*,8*aS*)-3-phenyl-4-(thiophen-3-yl)-4,6,7,8,8*a*,9-hexahydropyrrolo[1,2-*a*][1,2,3]triazolo[1,5-*d*]pyrazine 2s.**

$R_f = 0.31$  (EtOAc/hexane 3:7), Yield: 82%. Diastereomeric ratio >99,  $[\alpha]^{25}_D -74.9^\circ$  ( $c$  1.0, CHCl<sub>3</sub>), Pale yellow solid, mp: 175–176 °C. <sup>1</sup>H NMR (300 MHz, CDCl<sub>3</sub>, ppm,  $\delta$ ): 7.51–7.49 (d,  $J = 6.0$  Hz, 2H), 7.48–7.21 (m, 4H), 6.88–6.85 (m, 2H), 5.65 (s, 1H), 4.80–4.75 (dd,  $J_1 = 12.7$  Hz,  $J_2 = 12.6$  Hz, 1H), 4.10–4.02 (t,  $J = 10.5$  Hz, 1H), 3.23–3.21 (m, 1H), 2.97–2.95 (m, 1H), 2.50–2.47 (q,  $J = 9.0$  Hz, 1H), 1.98–1.81 (m, 2H), 1.64–1.61 (m, 2H); <sup>13</sup>C NMR (75 MHz, CDCl<sub>3</sub>, ppm,  $\delta$ ): 141.65, 136.21, 131.13, 130.85, 128.33, 128.19, 127.33, 126.18, 125.90, 124.54, 53.28, 51.64, 50.67, 48.59, 27.70, 22.04; IR (KBr, thin film, cm<sup>-1</sup>): 3060, 2972, 2846, 1607, 1448, 1226, 1157, 1001, 787, 691; LRMS-EI ( $m/z$ ): 322 (22), 293 (100), 265 (13), 224 (11), 197 (29), 166 (18), 165 (57), 136 (16), 110 (26), 97 (2); HRMS-EI ( $m/z$ ):  $M^+$  calcd for C<sub>18</sub>H<sub>18</sub>N<sub>4</sub>S, 322.1252; found 322.1250.

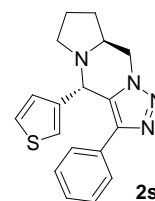

**(4*R*,8*aS*)-3-phenyl-4-(thiophen-2-yl)-4,6,7,8,8*a*,9-hexahydropyrrolo[1,2-*a*][1,2,3]triazolo[1,5-*d*]pyrazine (2t).**

$R_f = 0.31$  (EtOAc/Hexane 3:7), Yield: 78%. Distereomeric ratio >99,  $[\alpha]_D^{25} -74.9^\circ$  ( $c$  1.0, CHCl<sub>3</sub>), brown solid, mp: 178–179 °C. <sup>1</sup>H NMR (300 MHz, CDCl<sub>3</sub>, ppm,  $\delta$ ): 7.57–7.55 (m, 2H), 7.31–7.23 (m, 4H), 6.97–6.94 (m, 1H), 6.76–6.75 (d,  $J = 3.8$  Hz, 1H), 5.82 (s, 1H), 4.79–4.73 (dd,  $J_1 = 12.9$  Hz,  $J_2 = 12.7$  Hz, 1H), 4.10–4.02 (t,  $J = 12.0$  Hz, 1H), 3.39–3.37 (m, 1H) 2.96–2.92 (m, 1H), 2.62–2.53 (q,  $J = 9.0$  Hz, 1H), 2.08–2.00 (m, 2H), 1.96–2.1.94 (m, 1H), 1.83–1.80 (m, 1H); <sup>13</sup>C NMR (100 MHz, CDCl<sub>3</sub>, ppm,  $\delta$ ): 142.22, 138.11, 130.96, 130.86, 128.53, 128.13, 127.66, 126.83, 126.50, 126.15, 53.44, 51.66, 50.97, 48.69, 28.10, 22.30; IR (KBr, thin film, cm<sup>-1</sup>): 3054, 2934, 2851, 1610, 1492, 1355, 1220, 1080, 809, 760, 694; LRMS-EI ( $m/z$ ): 322 (322 (13), 296 (71), 293 (84), 289 (96), 271 (37), 197 (24), 179 (12), 165 (100), 137 (15), 110 (30), 97 (20); HRMS-EI ( $m/z$ ):  $M^+$  calcd for C<sub>18</sub>H<sub>18</sub>N<sub>4</sub>S, 322.1252; found 322.1257.

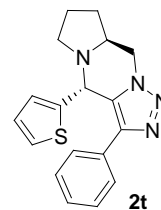

Figure 1. Crystal structure of (4*S*,8*aS*)-3-phenyl-4-(thien-3-yl)-4,6,7,8,8*a*,9-hexahydropyrrolo[1,2-*a*][1,2,3]triazolo[1,5-*d*]pyrazine (2s) (CCDC -956372)

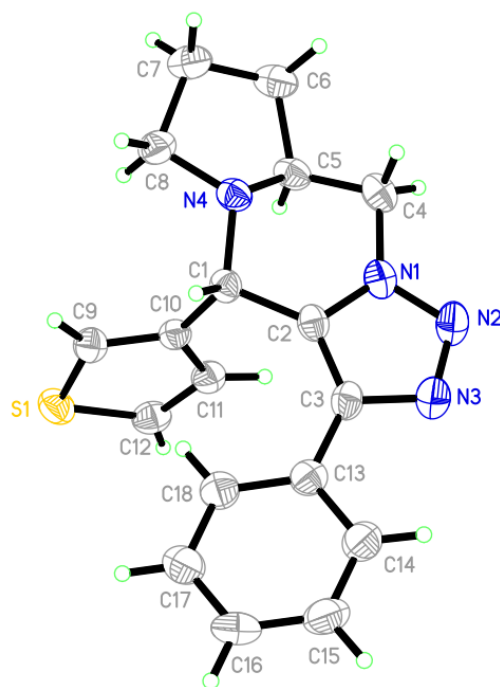

Fig. : The molecular structure of IC16202, thermal ellipsoids drawn at the 50% probability level.

Table 1. Crystal data and structure refinement for ic16202.

|                     |                                                  |
|---------------------|--------------------------------------------------|
| Identification code | ic16202                                          |
| Empirical formula   | C <sub>18</sub> H <sub>18</sub> N <sub>4</sub> S |
| Formula weight      | 322.42                                           |
| Temperature         | 150(2) K                                         |
| Wavelength          | 0.71073 Å                                        |

|                                   |                                                                                                                           |
|-----------------------------------|---------------------------------------------------------------------------------------------------------------------------|
| Crystal system                    | Orthorhombic                                                                                                              |
| Space group                       | P2(1)2(1)2(1)                                                                                                             |
| Unit cell dimensions              | a = 13.2080(2) Å $\alpha = 90^\circ$ .<br>b = 14.3890(2) Å $\beta = 90^\circ$ .<br>c = 16.8169(2) Å $\gamma = 90^\circ$ . |
| Volume                            | 3196.05(8) Å <sup>3</sup>                                                                                                 |
| Z                                 | 8                                                                                                                         |
| Density (calculated)              | 1.340 Mg/m <sup>3</sup>                                                                                                   |
| Absorption coefficient            | 0.207 mm <sup>-1</sup>                                                                                                    |
| F(000)                            | 1360                                                                                                                      |
| Crystal size                      | 0.30 x 0.14 x 0.06 mm <sup>3</sup>                                                                                        |
| Theta range for data collection   | 1.86 to 27.50°.                                                                                                           |
| Index ranges                      | -16 ≤ h ≤ 17, -17 ≤ k ≤ 18, -20 ≤ l ≤ 21                                                                                  |
| Reflections collected             | 41328                                                                                                                     |
| Independent reflections           | 7320 [R(int) = 0.0652]                                                                                                    |
| Completeness to theta = 27.50°    | 100.0 %                                                                                                                   |
| Absorption correction             | Semi-empirical from equivalents                                                                                           |
| Max. and min. transmission        | 0.990 and 0.932                                                                                                           |
| Refinement method                 | Full-matrix least-squares on F <sup>2</sup>                                                                               |
| Data / restraints / parameters    | 7320 / 0 / 416                                                                                                            |
| Goodness-of-fit on F <sup>2</sup> | 1.023                                                                                                                     |
| Final R indices [I > 2σ(I)]       | R1 = 0.0400, wR2 = 0.0905                                                                                                 |
| R indices (all data)              | R1 = 0.0718, wR2 = 0.1053                                                                                                 |
| Absolute structure parameter      | -0.01(7)                                                                                                                  |
| Largest diff. peak and hole       | 0.233 and -0.269 e.Å <sup>-3</sup>                                                                                        |

Table 2. A tomic coordinates (  $\times 10^4$ ) and equivalent isotropic displacement parameters (Å<sup>2</sup> × 10<sup>3</sup>) for ic16202. U(eq) is defined as one third of the trace of the orthogonalized U<sup>ij</sup> tensor.

|      | x       | y        | z       | U(eq) |
|------|---------|----------|---------|-------|
| S(1) | 7668(1) | 11443(1) | 1979(1) | 39(1) |
| N(1) | 6118(2) | 7662(1)  | 1288(1) | 33(1) |
| N(2) | 5427(2) | 7186(1)  | 1712(1) | 41(1) |
| N(3) | 5633(2) | 7331(1)  | 2469(1) | 40(1) |
| N(4) | 7695(1) | 8473(1)  | 569(1)  | 31(1) |
| C(1) | 7591(2) | 8720(1)  | 1409(1) | 28(1) |
| C(2) | 6782(2) | 8112(1)  | 1764(1) | 29(1) |
| C(3) | 6466(2) | 7895(1)  | 2531(2) | 32(1) |

|        |         |          |         |       |
|--------|---------|----------|---------|-------|
| C(4)   | 6159(2) | 7611(2)  | 420(1)  | 37(1) |
| C(5)   | 6736(2) | 8445(2)  | 123(1)  | 33(1) |
| C(6)   | 7082(2) | 8373(2)  | -747(1) | 44(1) |
| C(7)   | 8188(2) | 8702(2)  | -760(1) | 44(1) |
| C(8)   | 8411(2) | 9019(2)  | 96(1)   | 38(1) |
| C(9)   | 8135(2) | 10384(2) | 1705(1) | 32(1) |
| C(10)  | 7380(2) | 9745(1)  | 1594(1) | 28(1) |
| C(11)  | 6406(2) | 10144(2) | 1728(1) | 32(1) |
| C(12)  | 6450(2) | 11061(2) | 1940(1) | 36(1) |
| C(13)  | 6870(2) | 8134(2)  | 3315(1) | 33(1) |
| C(14)  | 6552(2) | 7635(2)  | 3984(2) | 41(1) |
| C(15)  | 6959(2) | 7822(2)  | 4728(2) | 47(1) |
| C(16)  | 7669(2) | 8513(2)  | 4825(1) | 45(1) |
| C(17)  | 7975(2) | 9022(2)  | 4171(2) | 43(1) |
| C(18)  | 7590(2) | 8833(2)  | 3421(1) | 39(1) |
| S(2)   | 6180(1) | 4882(1)  | 2218(1) | 47(1) |
| S(2')  | 6646(1) | 3794(1)  | 2211(1) | 52(1) |
| N(5)   | 9563(1) | 6846(1)  | 2890(1) | 33(1) |
| N(6)   | 9756(2) | 7586(1)  | 2421(1) | 37(1) |
| N(7)   | 9687(1) | 7294(1)  | 1678(1) | 36(1) |
| N(8)   | 9281(1) | 5254(1)  | 3710(1) | 30(1) |
| C(19)  | 9099(2) | 5162(2)  | 2848(1) | 30(1) |
| C(20)  | 9379(2) | 6070(1)  | 2458(1) | 30(1) |
| C(21)  | 9450(2) | 6365(2)  | 1678(1) | 31(1) |
| C(22)  | 9526(2) | 6914(2)  | 3758(1) | 39(1) |
| C(23)  | 8893(2) | 6113(2)  | 4063(1) | 34(1) |
| C(24)  | 9015(2) | 5937(2)  | 4957(2) | 49(1) |
| C(25)  | 8916(2) | 4885(2)  | 5050(2) | 44(1) |
| C(26)  | 8900(2) | 4491(2)  | 4204(1) | 35(1) |
| C(27)  | 7226(2) | 5441(2)  | 2455(1) | 34(1) |
| C(28)  | 8049(2) | 4860(1)  | 2597(1) | 29(1) |
| C(29)  | 7780(2) | 3929(2)  | 2487(2) | 43(1) |
| C(30)  | 6646(1) | 3794(1)  | 2211(1) | 52(1) |
| C(30') | 6180(1) | 4882(1)  | 2218(1) | 47(1) |
| C(31)  | 9297(2) | 5859(2)  | 930(1)  | 32(1) |
| C(32)  | 9494(2) | 4912(2)  | 861(2)  | 40(1) |
| C(33)  | 9376(2) | 4463(2)  | 139(2)  | 44(1) |
| C(34)  | 9055(2) | 4939(2)  | -525(2) | 44(1) |



|       |         |         |         |       |
|-------|---------|---------|---------|-------|
| C(35) | 8840(2) | 5877(2) | -462(2) | 43(1) |
| C(36) | 8952(2) | 6334(2) | 256(1)  | 37(1) |

Table 3. Bond

lengths [Å] and angles [°] for ic16202.

|             |          |
|-------------|----------|
| S(1)-C(12)  | 1.702(2) |
| S(1)-C(9)   | 1.706(2) |
| N(1)-N(2)   | 1.346(3) |
| N(1)-C(2)   | 1.352(3) |
| N(1)-C(4)   | 1.462(3) |
| N(2)-N(3)   | 1.318(3) |
| N(3)-C(3)   | 1.372(3) |
| N(4)-C(1)   | 1.463(3) |
| N(4)-C(8)   | 1.464(3) |
| N(4)-C(5)   | 1.472(3) |
| C(1)-C(2)   | 1.505(3) |
| C(1)-C(10)  | 1.534(3) |
| C(2)-C(3)   | 1.391(3) |
| C(3)-C(13)  | 1.463(3) |
| C(4)-C(5)   | 1.507(3) |
| C(5)-C(6)   | 1.538(3) |
| C(6)-C(7)   | 1.536(4) |
| C(7)-C(8)   | 1.538(3) |
| C(9)-C(10)  | 1.370(3) |
| C(10)-C(11) | 1.426(3) |
| C(11)-C(12) | 1.367(3) |
| C(13)-C(18) | 1.395(3) |
| C(13)-C(14) | 1.399(3) |
| C(14)-C(15) | 1.387(4) |
| C(15)-C(16) | 1.376(4) |
| C(16)-C(17) | 1.381(4) |
| C(17)-C(18) | 1.387(3) |
| S(2)-C(27)  | 1.647(3) |
| S(2')-C(29) | 1.581(3) |
| N(5)-N(6)   | 1.350(3) |
| N(5)-C(20)  | 1.355(3) |
| N(5)-C(22)  | 1.464(3) |
| N(6)-N(7)   | 1.322(3) |

|             |          |
|-------------|----------|
| N(7)-C(21)  | 1.373(3) |
| N(8)-C(23)  | 1.464(3) |
| N(8)-C(26)  | 1.466(3) |
| N(8)-C(19)  | 1.474(3) |
| C(19)-C(20) | 1.507(3) |
| C(19)-C(28) | 1.515(3) |
| C(20)-C(21) | 1.382(3) |
| C(21)-C(31) | 1.468(3) |
| C(22)-C(23) | 1.514(3) |
| C(23)-C(24) | 1.534(3) |
| C(24)-C(25) | 1.528(3) |
| C(25)-C(26) | 1.532(3) |
| C(27)-C(28) | 1.391(3) |
| C(28)-C(29) | 1.398(3) |
| C(31)-C(32) | 1.393(3) |
| C(31)-C(36) | 1.400(3) |
| C(32)-C(33) | 1.383(3) |
| C(33)-C(34) | 1.378(4) |
| C(34)-C(35) | 1.383(4) |
| C(35)-C(36) | 1.381(3) |

|                 |            |
|-----------------|------------|
| C(12)-S(1)-C(9) | 92.47(11)  |
| N(2)-N(1)-C(2)  | 111.68(19) |
| N(2)-N(1)-C(4)  | 121.88(19) |
| C(2)-N(1)-C(4)  | 126.3(2)   |
| N(3)-N(2)-N(1)  | 106.91(19) |
| N(2)-N(3)-C(3)  | 109.49(19) |
| C(1)-N(4)-C(8)  | 117.08(17) |
| C(1)-N(4)-C(5)  | 114.70(17) |
| C(8)-N(4)-C(5)  | 107.10(18) |
| N(4)-C(1)-C(2)  | 107.97(17) |
| N(4)-C(1)-C(10) | 116.51(17) |
| C(2)-C(1)-C(10) | 110.47(18) |
| N(1)-C(2)-C(3)  | 104.38(19) |
| N(1)-C(2)-C(1)  | 120.3(2)   |
| C(3)-C(2)-C(1)  | 135.3(2)   |
| N(3)-C(3)-C(2)  | 107.5(2)   |
| N(3)-C(3)-C(13) | 120.0(2)   |

|                   |            |
|-------------------|------------|
| C(2)-C(3)-C(13)   | 132.4(2)   |
| N(1)-C(4)-C(5)    | 107.99(18) |
| N(4)-C(5)-C(4)    | 106.80(18) |
| N(4)-C(5)-C(6)    | 103.38(18) |
| C(4)-C(5)-C(6)    | 114.3(2)   |
| C(7)-C(6)-C(5)    | 105.96(19) |
| C(6)-C(7)-C(8)    | 105.06(19) |
| N(4)-C(8)-C(7)    | 103.09(19) |
| C(10)-C(9)-S(1)   | 111.87(18) |
| C(9)-C(10)-C(11)  | 111.44(19) |
| C(9)-C(10)-C(1)   | 122.8(2)   |
| C(11)-C(10)-C(1)  | 125.66(19) |
| C(12)-C(11)-C(10) | 113.0(2)   |
| C(11)-C(12)-S(1)  | 111.19(18) |
| C(18)-C(13)-C(14) | 118.1(2)   |
| C(18)-C(13)-C(3)  | 122.2(2)   |
| C(14)-C(13)-C(3)  | 119.7(2)   |
| C(15)-C(14)-C(13) | 120.6(2)   |
| C(16)-C(15)-C(14) | 120.7(2)   |
| C(15)-C(16)-C(17) | 119.2(2)   |
| C(16)-C(17)-C(18) | 120.8(2)   |
| C(17)-C(18)-C(13) | 120.5(2)   |
| N(6)-N(5)-C(20)   | 111.78(19) |
| N(6)-N(5)-C(22)   | 122.44(18) |
| C(20)-N(5)-C(22)  | 125.74(19) |
| N(7)-N(6)-N(5)    | 106.78(18) |
| N(6)-N(7)-C(21)   | 108.99(19) |
| C(23)-N(8)-C(26)  | 106.41(17) |
| C(23)-N(8)-C(19)  | 114.67(17) |
| C(26)-N(8)-C(19)  | 115.71(18) |
| N(8)-C(19)-C(20)  | 108.08(17) |
| N(8)-C(19)-C(28)  | 116.68(18) |
| C(20)-C(19)-C(28) | 110.61(18) |
| N(5)-C(20)-C(21)  | 104.08(19) |
| N(5)-C(20)-C(19)  | 121.65(19) |
| C(21)-C(20)-C(19) | 134.1(2)   |
| N(7)-C(21)-C(20)  | 108.4(2)   |
| N(7)-C(21)-C(31)  | 121.0(2)   |

|                   |            |
|-------------------|------------|
| C(20)-C(21)-C(31) | 130.7(2)   |
| N(5)-C(22)-C(23)  | 107.74(18) |
| N(8)-C(23)-C(22)  | 108.19(19) |
| N(8)-C(23)-C(24)  | 102.81(19) |
| C(22)-C(23)-C(24) | 113.6(2)   |
| C(25)-C(24)-C(23) | 104.8(2)   |
| C(24)-C(25)-C(26) | 105.8(2)   |
| N(8)-C(26)-C(25)  | 104.17(19) |
| C(28)-C(27)-S(2)  | 113.75(17) |
| C(27)-C(28)-C(29) | 110.8(2)   |
| C(27)-C(28)-C(19) | 126.20(19) |
| C(29)-C(28)-C(19) | 123.0(2)   |
| C(28)-C(29)-S(2') | 113.38(19) |
| C(32)-C(31)-C(36) | 118.1(2)   |
| C(32)-C(31)-C(21) | 122.1(2)   |
| C(36)-C(31)-C(21) | 119.8(2)   |
| C(33)-C(32)-C(31) | 120.6(2)   |
| C(34)-C(33)-C(32) | 120.9(2)   |
| C(33)-C(34)-C(35) | 119.0(2)   |
| C(36)-C(35)-C(34) | 120.7(2)   |
| C(35)-C(36)-C(31) | 120.7(2)   |

---

Symmetry transformations used to generate equivalent atoms:

Table 4. Anisotropic displacement parameters ( $\text{\AA}^2 \times 10^3$ ) for ic16202. The anisotropic displacement factor exponent takes the form:  $-2\pi^2 [ h^2 a^{*2} U^{11} + \dots + 2 h k a^* b^* U^{12} ]$

|      | U <sup>11</sup> | U <sup>22</sup> | U <sup>33</sup> | U <sup>23</sup> | U <sup>13</sup> | U <sup>12</sup> |
|------|-----------------|-----------------|-----------------|-----------------|-----------------|-----------------|
| S(1) | 50(1)           | 30(1)           | 37(1)           | -5(1)           | -1(1)           | -4(1)           |
| N(1) | 31(1)           | 31(1)           | 39(1)           | 0(1)            | -5(1)           | -3(1)           |
| N(2) | 36(1)           | 40(1)           | 49(1)           | 4(1)            | -1(1)           | -11(1)          |
| N(3) | 38(1)           | 37(1)           | 45(1)           | 3(1)            | 0(1)            | -7(1)           |
| N(4) | 29(1)           | 34(1)           | 29(1)           | -4(1)           | -3(1)           | 2(1)            |
| C(1) | 24(1)           | 30(1)           | 30(1)           | -1(1)           | -2(1)           | 0(1)            |
| C(2) | 28(1)           | 23(1)           | 36(1)           | 0(1)            | -3(1)           | 1(1)            |
| C(3) | 31(1)           | 25(1)           | 39(1)           | 3(1)            | 2(1)            | -2(1)           |
| C(4) | 36(1)           | 35(1)           | 39(1)           | -5(1)           | -8(1)           | -1(1)           |

|        |       |       |       |        |       |        |
|--------|-------|-------|-------|--------|-------|--------|
| C(5)   | 30(1) | 37(1) | 30(1) | -7(1)  | -4(1) | 5(1)   |
| C(6)   | 47(2) | 51(2) | 33(1) | -10(1) | -1(1) | 6(1)   |
| C(7)   | 43(2) | 54(2) | 34(1) | -3(1)  | 5(1)  | 6(1)   |
| C(8)   | 32(1) | 48(1) | 34(1) | -4(1)  | 6(1)  | -1(1)  |
| C(9)   | 33(1) | 31(1) | 33(1) | 1(1)   | 0(1)  | 0(1)   |
| C(10)  | 31(1) | 28(1) | 24(1) | 0(1)   | 1(1)  | -1(1)  |
| C(11)  | 32(1) | 32(1) | 31(1) | 0(1)   | 3(1)  | 2(1)   |
| C(12)  | 39(1) | 35(1) | 34(1) | 0(1)   | 6(1)  | 7(1)   |
| C(13)  | 36(1) | 28(1) | 35(1) | 0(1)   | 4(1)  | 4(1)   |
| C(14)  | 45(2) | 37(1) | 42(2) | 0(1)   | 8(1)  | -1(1)  |
| C(15)  | 58(2) | 47(2) | 35(2) | 2(1)   | 14(1) | 1(1)   |
| C(16)  | 56(2) | 50(2) | 29(1) | -8(1)  | 4(1)  | 9(1)   |
| C(17)  | 48(2) | 44(1) | 37(2) | -6(1)  | -2(1) | -1(1)  |
| C(18)  | 44(2) | 40(1) | 32(1) | 3(1)   | -1(1) | -3(1)  |
| S(2)   | 47(1) | 57(1) | 37(1) | 1(1)   | 2(1)  | 1(1)   |
| S(2')  | 53(1) | 48(1) | 54(1) | -1(1)  | -2(1) | -15(1) |
| N(5)   | 35(1) | 28(1) | 36(1) | 2(1)   | 1(1)  | -1(1)  |
| N(6)   | 39(1) | 31(1) | 42(1) | 3(1)   | 0(1)  | 0(1)   |
| N(7)   | 33(1) | 34(1) | 41(1) | 2(1)   | 0(1)  | 0(1)   |
| N(8)   | 33(1) | 30(1) | 28(1) | -2(1)  | 0(1)  | 3(1)   |
| C(19)  | 33(1) | 28(1) | 29(1) | -2(1)  | 1(1)  | 2(1)   |
| C(20)  | 29(1) | 28(1) | 33(1) | -1(1)  | 1(1)  | 1(1)   |
| C(21)  | 29(1) | 29(1) | 36(1) | 3(1)   | 4(1)  | 2(1)   |
| C(22)  | 48(2) | 34(1) | 34(1) | -6(1)  | -3(1) | 3(1)   |
| C(23)  | 37(1) | 37(1) | 29(1) | -4(1)  | 3(1)  | 5(1)   |
| C(24)  | 69(2) | 45(2) | 34(1) | -3(1)  | 1(1)  | 2(1)   |
| C(25)  | 49(2) | 49(2) | 34(1) | 2(1)   | 2(1)  | 7(1)   |
| C(26)  | 36(1) | 39(1) | 31(1) | 6(1)   | 1(1)  | 3(1)   |
| C(27)  | 35(1) | 35(1) | 31(1) | 1(1)   | 1(1)  | 1(1)   |
| C(28)  | 33(1) | 31(1) | 24(1) | -1(1)  | 2(1)  | -2(1)  |
| C(29)  | 54(2) | 32(1) | 42(1) | -1(1)  | -8(1) | 0(1)   |
| C(30)  | 53(1) | 48(1) | 54(1) | -1(1)  | -2(1) | -15(1) |
| C(30') | 47(1) | 57(1) | 37(1) | 1(1)   | 2(1)  | 1(1)   |
| C(31)  | 27(1) | 38(1) | 30(1) | 3(1)   | 4(1)  | 0(1)   |
| C(32)  | 46(2) | 42(1) | 33(1) | 3(1)   | 3(1)  | 2(1)   |
| C(33)  | 49(2) | 43(1) | 40(2) | -5(1)  | 2(1)  | -2(1)  |
| C(34)  | 39(2) | 59(2) | 34(1) | -3(1)  | -1(1) | -8(1)  |
| C(35)  | 36(1) | 59(2) | 34(1) | 7(1)   | -4(1) | -2(1)  |

C(36)      30(1)      42(1)      40(1)      5(1)      2(1)      -1(1)

Table 5. H ydrogen

coordinates ( $\times 10^4$ ) and isotropic displacement parameters ( $\text{\AA}^2 \times 10^{-3}$ )  
for ic16202.

|        | x     | y     | z     | U(eq) |
|--------|-------|-------|-------|-------|
| H(1)   | 8243  | 8554  | 1676  | 33    |
| H(4A)  | 5465  | 7610  | 197   | 44    |
| H(4B)  | 6503  | 7032  | 253   | 44    |
| H(5)   | 6339  | 9027  | 211   | 39    |
| H(6A)  | 7031  | 7723  | -937  | 52    |
| H(6B)  | 6658  | 8772  | -1092 | 52    |
| H(7A)  | 8276  | 9224  | -1138 | 52    |
| H(7B)  | 8645  | 8189  | -917  | 52    |
| H(8A)  | 9118  | 8878  | 247   | 46    |
| H(8B)  | 8288  | 9693  | 160   | 46    |
| H(9)   | 8835  | 10254 | 1638  | 39    |
| H(11)  | 5791  | 9807  | 1676  | 38    |
| H(12)  | 5875  | 11435 | 2050  | 43    |
| H(14)  | 6053  | 7164  | 3929  | 50    |
| H(15)  | 6746  | 7470  | 5175  | 56    |
| H(16)  | 7945  | 8639  | 5335  | 54    |
| H(17)  | 8456  | 9507  | 4236  | 52    |
| H(18)  | 7819  | 9181  | 2976  | 47    |
| H(19)  | 9583  | 4683  | 2646  | 36    |
| H(22A) | 9220  | 7513  | 3919  | 46    |
| H(22B) | 10219 | 6880  | 3982  | 46    |
| H(23)  | 8164  | 6204  | 3923  | 41    |
| H(24A) | 9685  | 6153  | 5145  | 59    |
| H(24B) | 8480  | 6263  | 5262  | 59    |
| H(25A) | 8283  | 4725  | 5334  | 53    |
| H(25B) | 9497  | 4631  | 5352  | 53    |
| H(26A) | 9343  | 3938  | 4160  | 42    |
| H(26B) | 8204  | 4316  | 4045  | 42    |
| H(27)  | 7264  | 6099  | 2492  | 41    |

|        |      |      |       |    |
|--------|------|------|-------|----|
| H(29)  | 8235 | 3427 | 2569  | 51 |
| H(30)  | 6308 | 3233 | 2073  | 62 |
| H(30') | 5516 | 5106 | 2117  | 56 |
| H(32)  | 9712 | 4571 | 1313  | 48 |
| H(33)  | 9517 | 3817 | 102   | 53 |
| H(34)  | 8983 | 4628 | -1020 | 53 |
| H(35)  | 8613 | 6210 | -915  | 51 |
| H(36)  | 8792 | 6976 | 292   | 44 |

---

$^1\text{H}$ ,  $^{13}\text{C}$ , Spectra of propargyl amine [1a-1af]

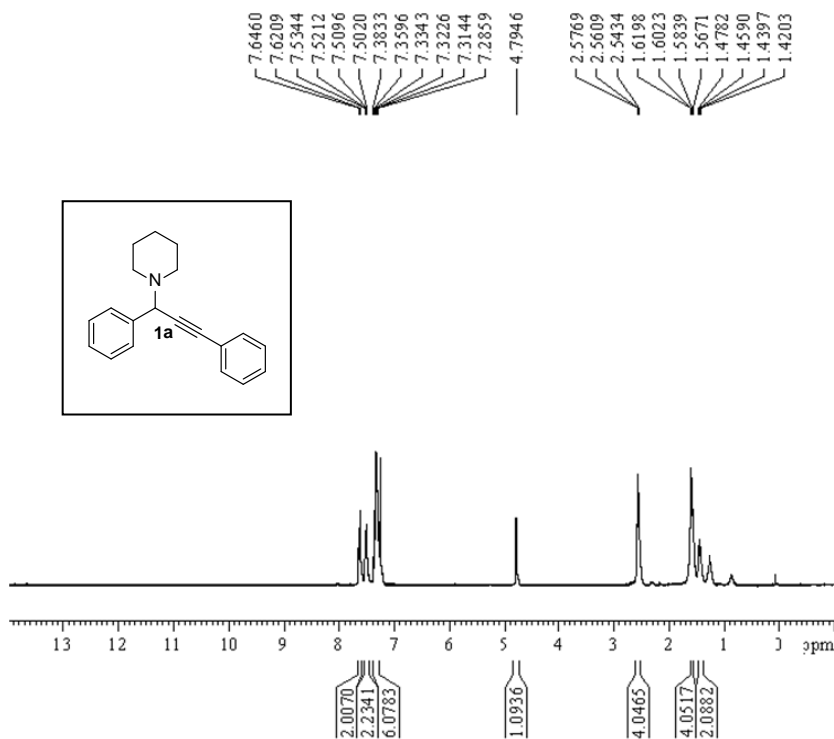

Current Data Parameters  
NAME SNA.165  
EXPNO 1  
PROCNO 1

F2 - Acquisition Parameters  
Date\_ 20120709  
Time 18.20  
INSTRUM spect  
PROBHD 5 mm Multima1  
PULPROG zg30  
TD 32768  
SOLVENT CDCl3  
NS 8  
DS 0  
SWH 4496.403 Hz  
FIDRES 0.137219 Hz  
AQ 3.6435515 sec  
RG 1024  
DW 111.260 usec  
DE 6.50 usec  
TE 299.2 K  
D1 1.5000000 sec  
MCREST 0.0000000 sec  
MCWRK 0.01500000 sec

==== CHANNEL f1 =====  
NUC1 1H  
P1 10.60 usec  
PL1 0.00 dB  
SFO1 300.1319508 MHz

F2 - Processing parameters  
SI 16384  
SF 300.1300671 MHz  
WDW EM  
SSB 0  
LB 0.10 Hz  
GB 0  
PC 1.00

1D NMR plot parameters  
CX 20.00 cm  
CY 0.00 cm  
FLP 13.967 ppm  
F1 4191.95 Hz  
F2P -1.014 ppm  
F2 -364.45 Hz  
PFMCM 0.74868 ppm/cm  
HZCM 224.82013 Hz/cm

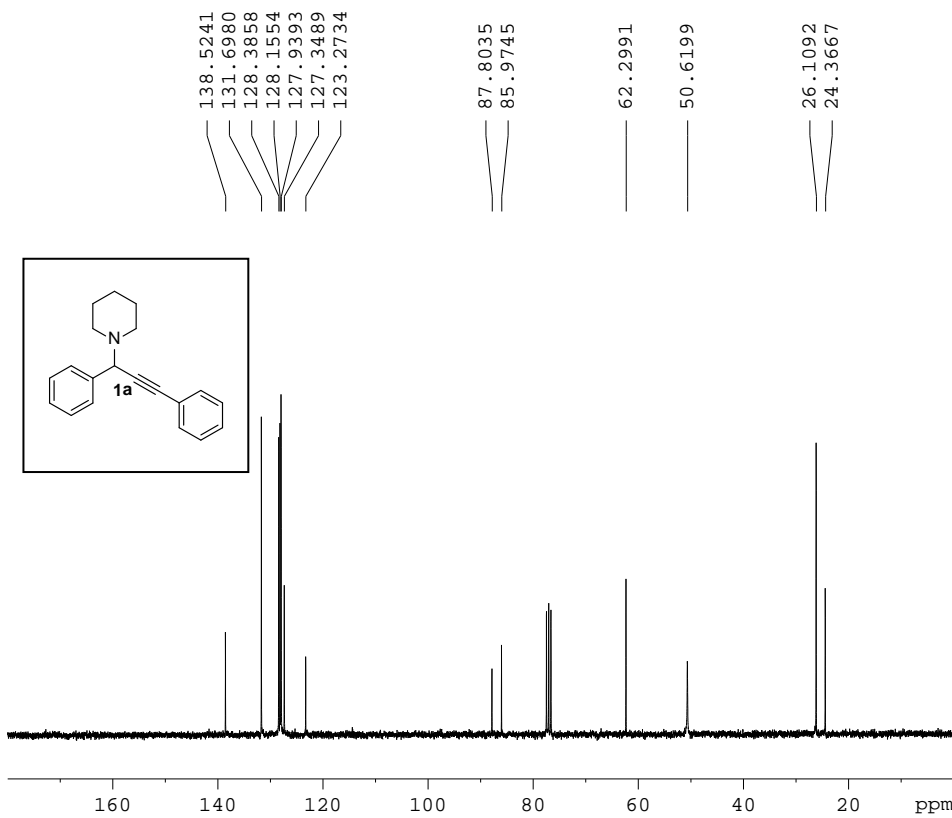

Current Data Parameters  
NAME SNA propargyl 13C  
EXPNO 1  
PROCNO 1

F2 - Acquisition Parameters  
Date\_ 20130519  
Time 14.43  
INSTRUM spect  
PROBHD 5 mm Multinucl  
PULPROG zgpg30  
TD 65536  
SOLVENT CDCl3  
NS 256  
DS 0  
SWH 18832.393 Hz  
FIDRES 0.287360 Hz  
AQ 1.7400308 sec  
RG 14596.5  
DW 26.550 usec  
DE 6.50 usec  
TE 301.2 K  
D1 1.50000000 sec  
d11 0.03000000 sec  
DELTA 1.39999998 sec  
MCREST 0.00000000 sec  
MCWRK 0.01500000 sec

==== CHANNEL f1 =====  
NUC1 13C  
P1 11.10 usec  
PL1 0.00 dB  
SFO1 75.4763978 MHz

==== CHANNEL f2 =====  
CPDPRG2 waltz16  
NUC2 1H  
PCPD2 90.00 usec  
PL2 0.00 dB  
PL12 18.80 dB  
PL13 21.80 dB  
SFO2 300.1313506 MHz

F2 - Processing parameters  
SI 32768  
SF 75.4677540 MHz  
WDW EM  
SSB 0  
LB 1.00 Hz  
GB 0  
PC 1.00



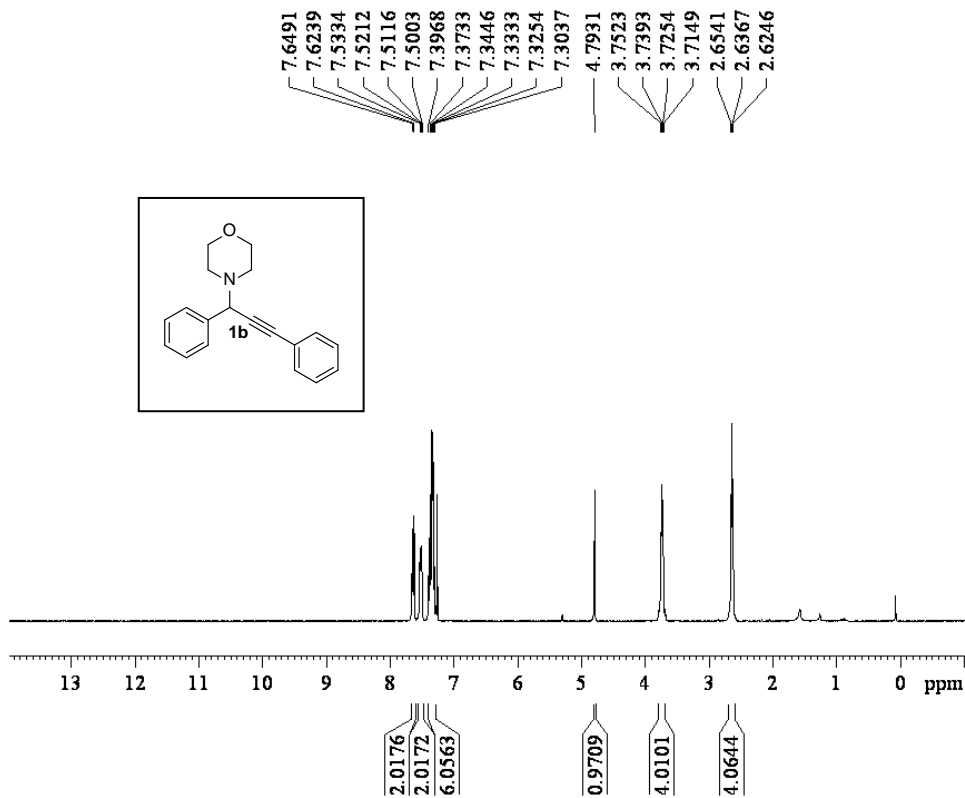

Current Data Parameters  
 NAME SNA 196  
 EXPNO 3  
 PROCNO 1

F2 - Acquisition Parameters  
 Date\_ 20120821  
 Time 10.18  
 INSTRUM spect  
 PROBHD 5 mm Multinucl  
 PULPROG zg30  
 TD 32768  
 SOLVENT CDCl3  
 NS 8  
 DS 0  
 SWH 4496.403 Hz  
 FIDRES 0.137219 Hz  
 A Q 3.6438515 sec  
 RG 1024  
 DW 111.200 usec  
 DE 6.50 usec  
 TE 299.2 K  
 D1 1.50000000 sec  
 MCREST 0.00000000 sec  
 MCWRK 0.01500000 sec

===== CHANNEL f1 =====  
 NUC1 1H  
 P1 10.60 usec  
 PL1 0.00 dB  
 SFO1 300.1319508 MHz

F2 - Processing parameters  
 SI 16384  
 SF 300.1300065 MHz  
 WDW EM  
 SSB 0  
 LB 0.10 Hz  
 GB 0  
 PC 1.00

ID NMR plot parameters  
 CX 20.00 cm  
 CY 0.00 cm  
 F1P 13.969 ppm  
 F1 4192.50 Hz  
 F2P -1.013 ppm  
 F2 -303.90 Hz  
 PPM CM 0.74908 ppm/cm  
 HZCM 224.82013 Hz/cm

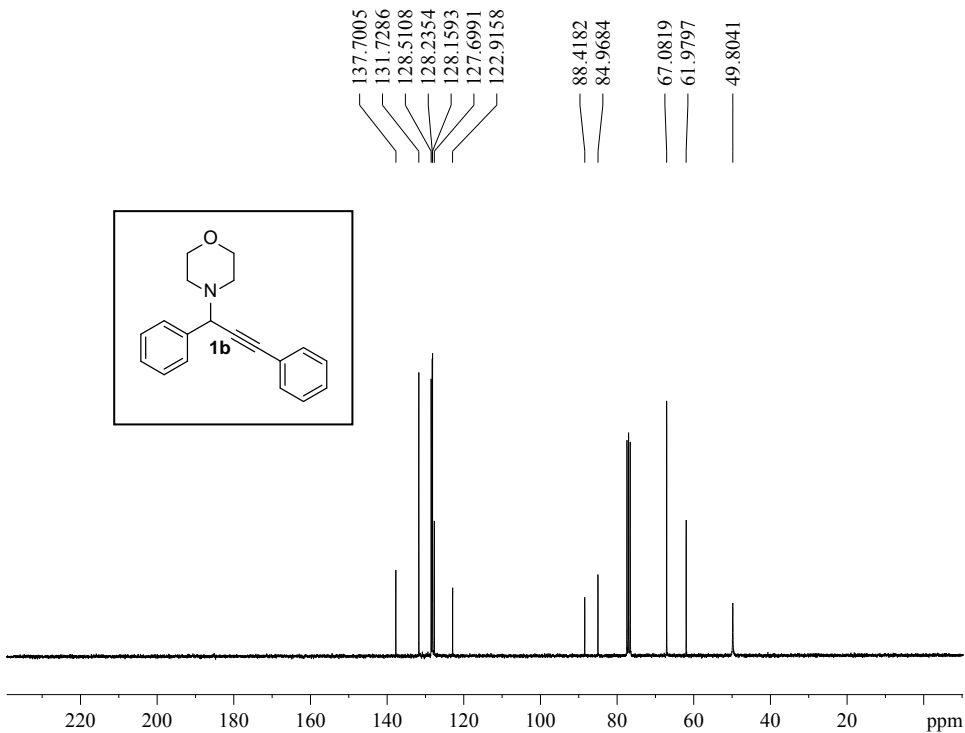

Current Data Parameters  
 NAME SNA morpholine 13C  
 EXPNO 1  
 PROCNO 1

F2 - Acquisition Parameters  
 Date\_ 20130519  
 Time 19.30  
 INSTRUM spect  
 PROBHD 5 mm Multinucl  
 PULPROG zgpg30  
 TD 65536  
 SOLVENT CDCl3  
 NS 1855  
 DS 0  
 SWH 18832.393 Hz  
 FIDRES 0.287360 Hz  
 A Q 1.7400308 sec  
 RG 11585.2  
 DW 26.550 usec  
 DE 6.50 usec  
 TE 301.2 K  
 D1 1.50000000 sec  
 d11 0.03000000 sec  
 DELTA 1.39999998 sec  
 MCREST 0.00000000 sec  
 MCWRK 0.01500000 sec

===== CHANNEL f1 =====  
 NUC1 13C  
 P1 11.10 usec  
 PL1 0.00 dB  
 SFO1 75.4763978 MHz

===== CHANNEL f2 =====  
 CPDPRG2 waltz16  
 NUC2 1H  
 PCPD2 90.00 usec  
 PL2 0.00 dB  
 PL12 18.80 dB  
 PL13 21.80 dB  
 SFO2 300.1313506 MHz

F2 - Processing parameters  
 SI 32768  
 SF 75.4677500 MHz  
 WDW EM  
 SSB 0  
 LB 1.00 Hz  
 GB 0  
 PC 1.00

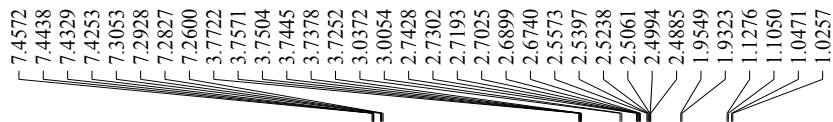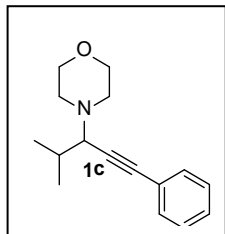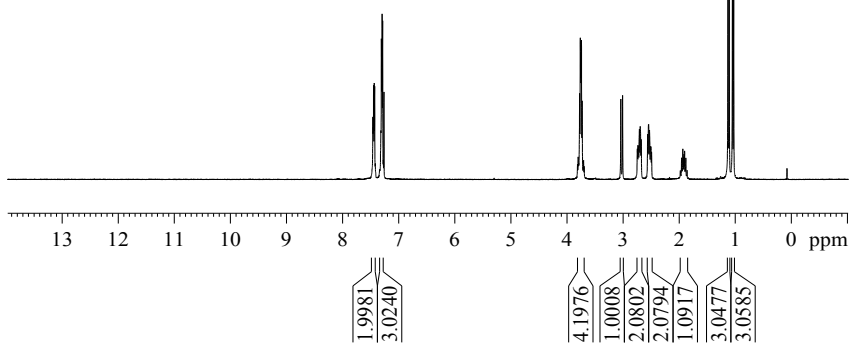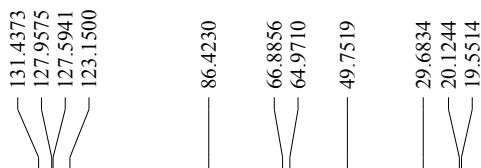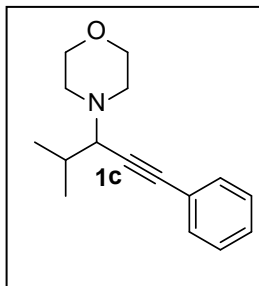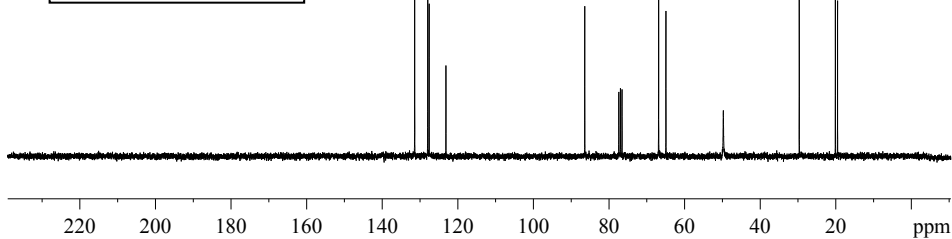

Current Data Parameters  
NAME SNA 44 proton  
EXPNO 1  
PROCNO 1

F2 - Acquisition Parameters  
Date\_ 20130701  
Time 17.35  
INSTRUM spect  
PROBHD 5 mm Multinucl  
PULPROG zg30  
TD 32768  
SOLVENT CDCl3  
NS 8  
DS 0  
SWH 4496.403 Hz  
FIDRES 0.137219 Hz  
AQ 3.6438515 sec  
RG 322.5  
DW 111.200 usec  
DE 6.50 usec  
TE 299.2 K  
D1 1.50000000 sec  
MCREST 0.00000000 sec  
MCWRK 0.01500000 sec

===== CHANNEL f1 =====  
NUC1 1H  
P1 10.60 usec  
PL1 0.00 dB  
SFO1 300.1319508 MHz

F2 - Processing parameters  
SI 16384  
SF 300.1300060 MHz  
WDW EM  
SSB 0  
LB 0.10 Hz  
GB 0  
PC 1.00

1D NMR plot parameters  
CX 20.00 cm  
CY 0.00 cm  
F1P 13.971 ppm  
F1 4193.05 Hz  
F2P -1.011 ppm  
F2 -303.35 Hz  
PPMCM 0.74908 ppm/cm  
HZCM 224.82013 Hz/cm

Current Data Parameters  
NAME SNA 44 13C  
EXPNO 1  
PROCNO 1

F2 - Acquisition Parameters  
Date\_ 20130701  
Time 17.49  
INSTRUM spect  
PROBHD 5 mm Multinucl  
PULPROG zgpg30  
TD 65536  
SOLVENT CDCl3  
NS 100  
DS 0  
SWH 18832.393 Hz  
FIDRES 0.287360 Hz  
AQ 1.7400308 sec  
RG 5792.6  
DW 26.550 usec  
DE 6.50 usec  
TE 300.2 K  
D1 1.50000000 sec  
d11 0.03000000 sec  
DELTA 1.39999998 sec  
MCREST 0.00000000 sec  
MCWRK 0.01500000 sec

===== CHANNEL f1 =====  
NUC1 13C  
P1 11.10 usec  
PL1 0.00 dB  
SFO1 75.4763978 MHz

===== CHANNEL f2 =====  
CPDPRG2 waltz16  
NUC2 1H  
PCPD2 90.00 usec  
PL2 0.00 dB  
PL12 18.80 dB  
PL13 21.80 dB  
SFO2 300.1313506 MHz

F2 - Processing parameters  
SI 32768  
SF 75.4677614 MHz  
WDW EM  
SSB 0  
LB 1.00 Hz  
GB 0  
PC 1.00

7.5186  
7.5056  
7.4995  
7.4951  
7.4855  
7.4351  
7.4307  
7.4255  
7.3476  
7.3437  
7.3326  
7.3209  
7.3100  
7.3028  
7.2932  
7.2517  
7.2475  
7.2349  
7.2306  
4.8214  
3.7619  
3.7436  
3.7297  
3.7201  
2.6489  
2.6333  
2.6185

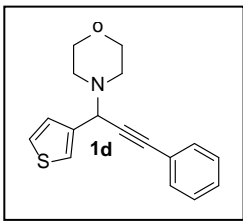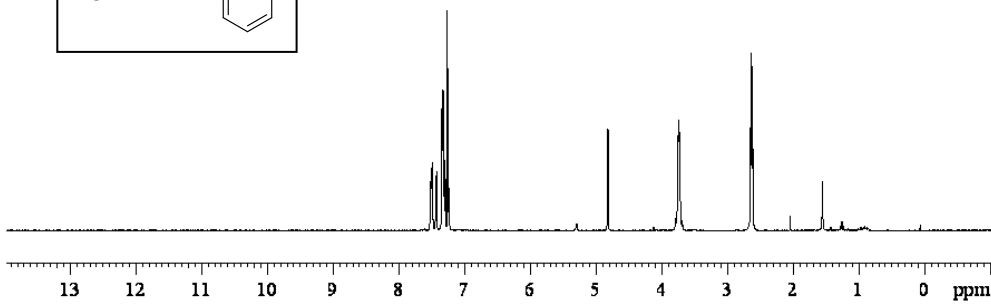

2.0136  
0.9952  
4.1738  
1.0163  
0.9814  
4.0188  
4.0280

Current Data Parameters  
NAME SNA 032 proton  
EXPNO 2  
PROCNO 1

F2 - Acquisition Parameters  
Date\_ 20130621  
Time 9.49  
INSTRUM spect  
PROBHD 5 mm Multinucl  
PULPROG zg30  
TD 32768  
SOLVENT CDCl3  
NS 8  
DS 0  
SWH 4496.403 Hz  
FIDRES 0.137219 Hz  
AQ 3.6438515 sec  
RG 912.3  
DW 111.200 usec  
DE 6.50 usec  
TE 300.2 K  
D1 1.50000000 sec  
MCREST 0.00000000 sec  
MCWRK 0.01500000 sec

===== CHANNEL f1 =====  
NUC1 1H  
P1 10.60 usec  
PL1 0.00 dB  
SFO1 300.1319508 MHz

F2 - Processing parameters  
SI 16384  
SF 300.1300060 MHz  
WDW EM  
SSB 0  
LB 0.10 Hz  
GB 0  
PC 1.00

139.2659  
131.4967  
128.0759  
127.3801  
125.4668  
123.3796  
122.5679  
87.0267  
84.9974  
66.7920  
57.5153  
53.2248  
49.3982

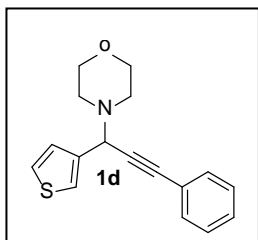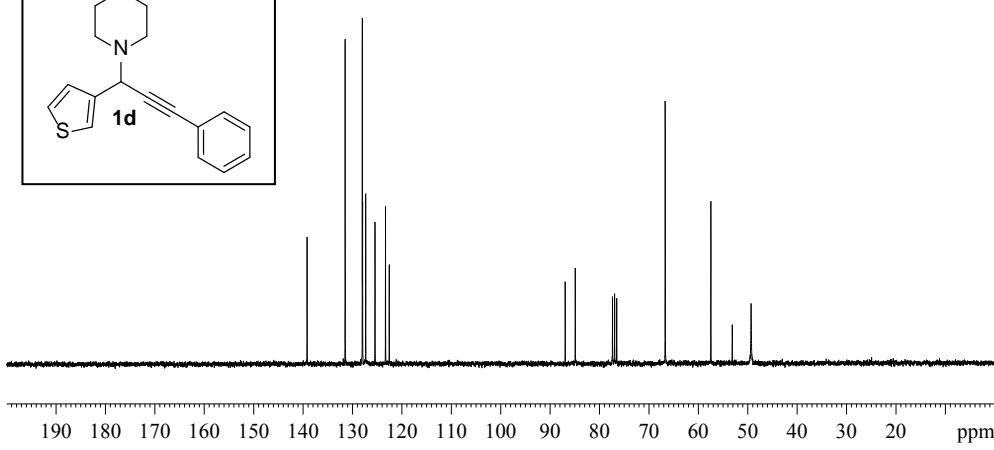

Current Data Parameters  
NAME SNA 32 13c new  
EXPNO 1  
PROCNO 1

F2 - Acquisition Parameters  
Date\_ 20130621  
Time 10.32  
INSTRUM spect  
PROBHD 5 mm Multinucl  
PULPROG zgpg30  
TD 65536  
SOLVENT CDCl3  
NS 100  
DS 0  
SWH 18832.393 Hz  
FIDRES 0.287360 Hz  
AQ 1.7400308 sec  
RG 10321.3  
DW 26.550 usec  
DE 6.50 usec  
TE 300.2 K  
D1 1.50000000 sec  
d11 0.03000000 sec  
DELTA 1.39999998 sec  
MCREST 0.00000000 sec  
MCWRK 0.01500000 sec

===== CHANNEL f1 =====  
NUC1 13C  
P1 11.10 usec  
PL1 0.00 dB  
SFO1 75.4763978 MHz

===== CHANNEL f2 =====  
CPDPRG2 waltz16  
NUC2 1H  
PCPD2 90.00 usec  
PL2 0.00 dB  
PL12 18.80 dB  
PL13 21.80 dB  
SFO2 300.1313506 MHz

F2 - Processing parameters  
SI 32768  
SF 75.4677752 MHz  
WDW EM  
SSB 0  
LB 1.00 Hz  
GB 0  
PC 1.00

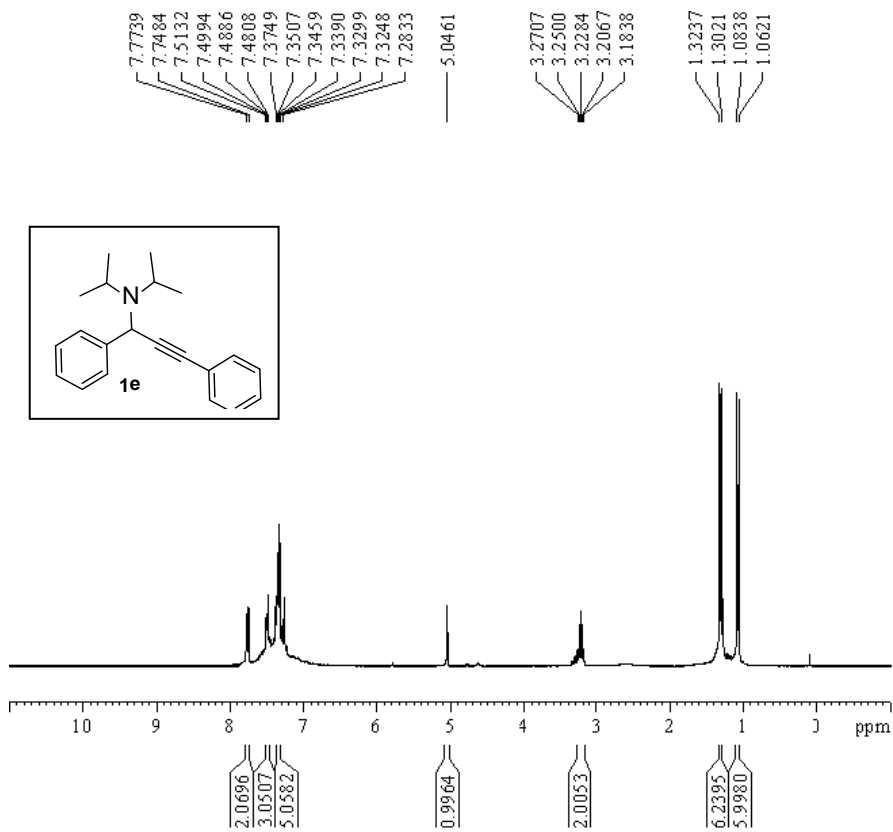

Current Data Parameters  
 NAME shddiso t1f0  
 EXPNO 1  
 PROCNO 1

F2 - Acquisition Parameters  
 Date\_ 20131020  
 Time 19.48  
 INSTRUM spect  
 PROBHD 5 mm Multinucl  
 PULPROG zg30  
 TD 32768  
 SOLVENT CDCl3  
 NS 8  
 DS 0  
 SWH 4496.403 Hz  
 FIDRES 0.137219 Hz  
 AQ 3.6438515 sec  
 RG 322.5  
 DW 111.200 usec  
 DE 6.50 usec  
 TE 301.2 K  
 D1 1.5000000 sec  
 MCRE ST 0.0000000 sec  
 MCWRK 0.0150000 sec

===== CHANNEL f1 =====  
 NUC1 1H  
 P1 10.60 usec  
 PL1 0.00 dB  
 SF O1 300.1319508 MHz

F2 - Processing parameters  
 SI 16384  
 SF 300.1300052 MHz  
 WDW EM  
 SSB 0  
 LB 0.10 Hz  
 GB 0  
 PC 1.00

1D NMR plot parameters  
 CX 20.00 cm  
 CY 0.00 cm  
 FIP 13.974 ppm  
 F1 4193.87 Hz  
 F2P -1.008 ppm  
 F2 -302.53 Hz  
 PPM CM 0.74908 ppm/cm  
 HZCM 2248.2013 Hz/cm

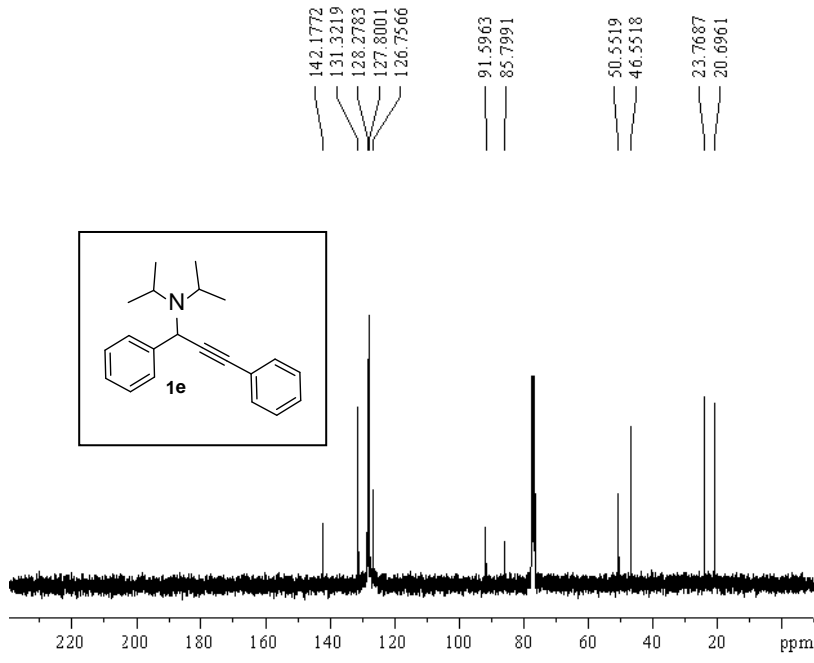

Current Data Parameters  
 NAME SNA DIP 13C 4 agst  
 EXPNO 1  
 PROCNO 2

F2 - Acquisition Parameters  
 Date\_ 20130805  
 Time 9.56  
 INSTRUM spect  
 PROBHD 5 mm Multinucl  
 PULPROG zgpg30  
 TD 65536  
 SOLVENT CDCl3  
 NS 12405  
 DS 0  
 SWH 18832.393 Hz  
 FIDRES 0.287360 Hz  
 AQ 1.7400308 sec  
 RG 5792.6  
 DW 26.550 usec  
 DE 6.50 usec  
 TE 301.2 K  
 D1 1.5000000 sec  
 d11 0.0300000 sec  
 DELTA 1.3999998 sec  
 MCRE ST 0.0000000 sec  
 MCWRK 0.0150000 sec

===== CHANNEL f1 =====  
 NUC1 13C  
 P1 11.10 usec  
 PL1 0.00 dB  
 SF O1 75.4763978 MHz

===== CHANNEL f2 =====  
 CPDPRG2 walz16  
 NUC2 1H  
 PCPD2 90.00 usec  
 PL2 0.00 dB  
 PL12 18.80 dB  
 PL13 21.80 dB  
 SF O2 300.1313506 MHz

F2 - Processing parameters  
 SI 32768  
 SF 75.4677505 MHz  
 WDW EM  
 SSB 0  
 LB 1.00 Hz  
 GB 0  
 PC 1.00

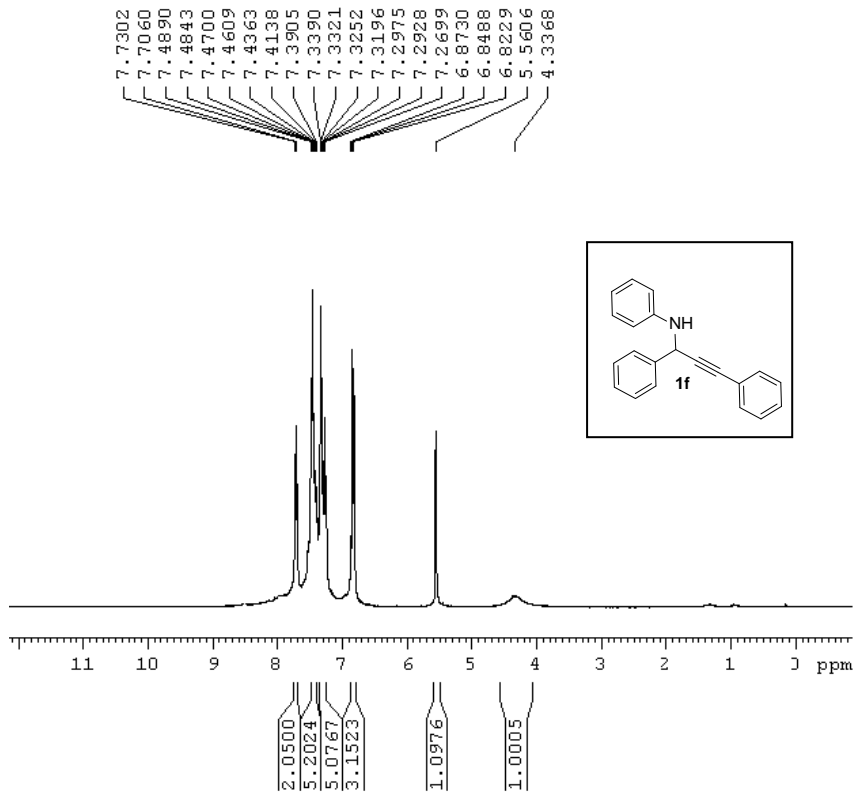

Current Data Parameters  
 NAME sls aniline tafo  
 EXPNO 1  
 PROCNO 1

F2 - Acquisition Parameters  
 Date\_ 20131020  
 Time 20.43  
 INSTRUM spect  
 PROBHD 5 mm Multima  
 PULPROG zg30  
 TD 32768  
 SOLVENT CDCl3  
 NS 8  
 DS 0  
 SWH 4496.403 Hz  
 FIDRES 0.137219 Hz  
 AQ 3.6438515 sec  
 RG 181  
 DW 111.200 usec  
 DE 6.50 usec  
 TE 301.2 K  
 D1 1.5000000 sec  
 MCREST 0.0000000 sec  
 MCWRK 0.0150000 sec

===== CHANNEL f1 =====  
 NUC1 1H  
 P1 10.60 usec  
 PL1 0.00 dB  
 SFO1 300.1319508 MHz

F2 - Processing parameters  
 SI 16384  
 SF 300.1300054 MHz  
 WDW EM  
 SSB 0  
 LB 0.10 Hz  
 GB 0  
 PC 1.00

ID NMR plot parameters  
 CX 20.00 cm  
 CY 0.00 cm  
 FIP 13.973 ppm  
 F1 4193.60 Hz  
 F2 -1.009 ppm  
 Fz -302.80 Hz  
 DPMCM 0.7408 ppm/cm  
 HZCM 22482013 Hz/cm

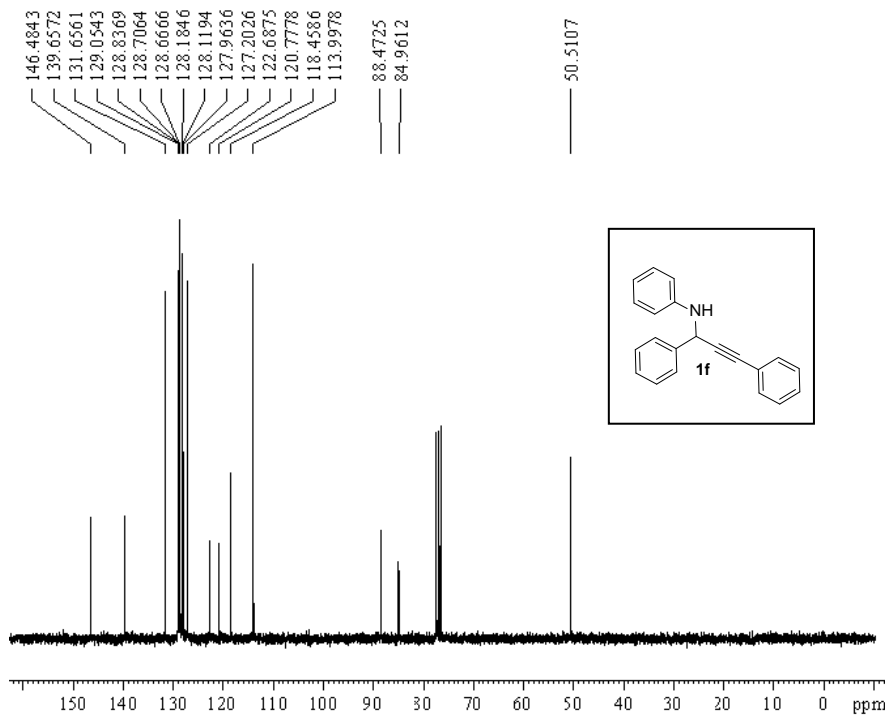

Current Data Parameters  
 NAME SNA aniline 13C nev  
 EXPNO 1  
 PROCNO 1

F2 - Acquisition Parameters  
 Date\_ 20130621  
 Time 10.55  
 INSTRUM spect  
 PROBHD 5 mm Multima  
 PULPROG zgpg30  
 TD 65536  
 SOLVENT CDCl3  
 NS 256  
 DS 0  
 SWH 18832.393 Hz  
 FIDRES 0.287360 Hz  
 AQ 1.7400308 sec  
 RG 5792.6  
 DW 26.550 usec  
 DE 6.50 usec  
 TE 300.2 K  
 D1 1.5000000 sec  
 d11 0.0300000 sec  
 DELTA 1.3999998 sec  
 MCREST 0.0000000 sec  
 MCWRK 0.0150000 sec

===== CHANNEL f1 =====  
 NUC1 13C  
 P1 11.10 usec  
 PL1 0.00 dB  
 SFO1 75.4763978 MHz

===== CHANNEL f2 =====  
 CPDPRG2 waltz16  
 NUC2 1H  
 PCPD2 90.00 usec  
 PL2 0.00 dB  
 PL12 18.80 dB  
 PL13 21.80 dB  
 SFO2 300.1313806 MHz

F2 - Processing parameters  
 SI 32768  
 SF 75.4677683 MHz  
 WDW EM  
 SSB 0  
 LB 1.00 Hz  
 GB 0  
 PC 1.00

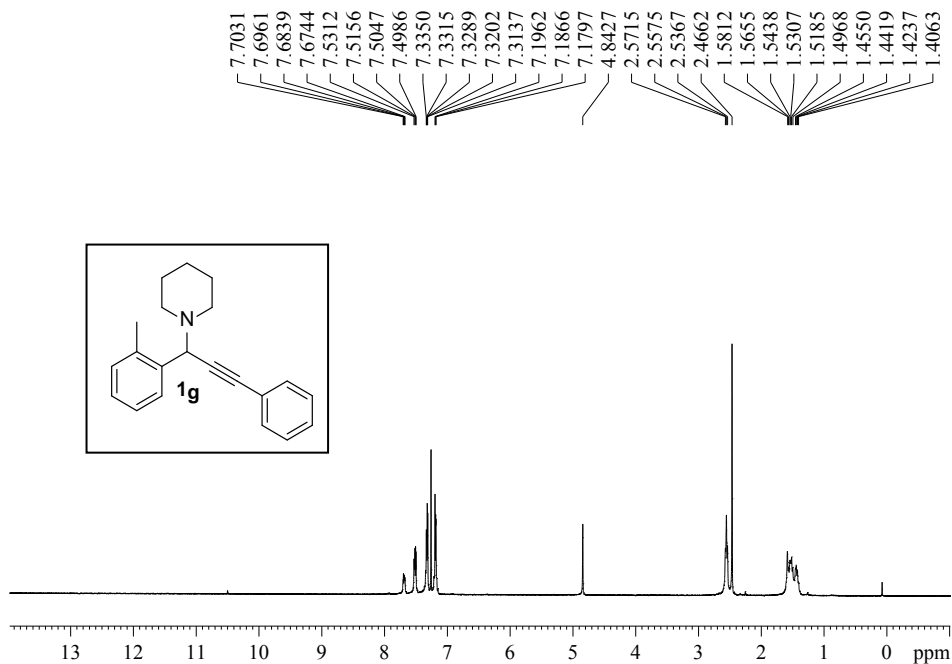

Current Data Parameters  
 NAME SNA o toulaldehyde  
 EXPNO 1  
 PROCNO 2

F2 - Acquisition Parameters  
 Date\_ 20130521  
 Time 18.58  
 INSTRUM spect  
 PROBHD 5 mm Multinucl  
 PULPROG zg30  
 TD 32768  
 SOLVENT CDCl3  
 NS 8  
 DS 0  
 SWH 4496.403 Hz  
 FIDRES 0.137219 Hz  
 AQ 3.6438515 sec  
 RG 812.7  
 DW 111.200 usec  
 DE 6.50 usec  
 TE 301.2 K  
 DI 1.5000000 sec  
 MCREST 0.0000000 sec  
 MCWRK 0.01500000 sec

==== CHANNEL f1 =====  
 NUC1 1H  
 P1 10.60 usec  
 PL1 0.00 dB  
 SFO1 300.1319508 MHz

F2 - Processing parameters  
 SI 16384  
 SF 300.1300063 MHz  
 WDW EM  
 SSB 0  
 LB 0.10 Hz  
 GB 0  
 PC 1.00

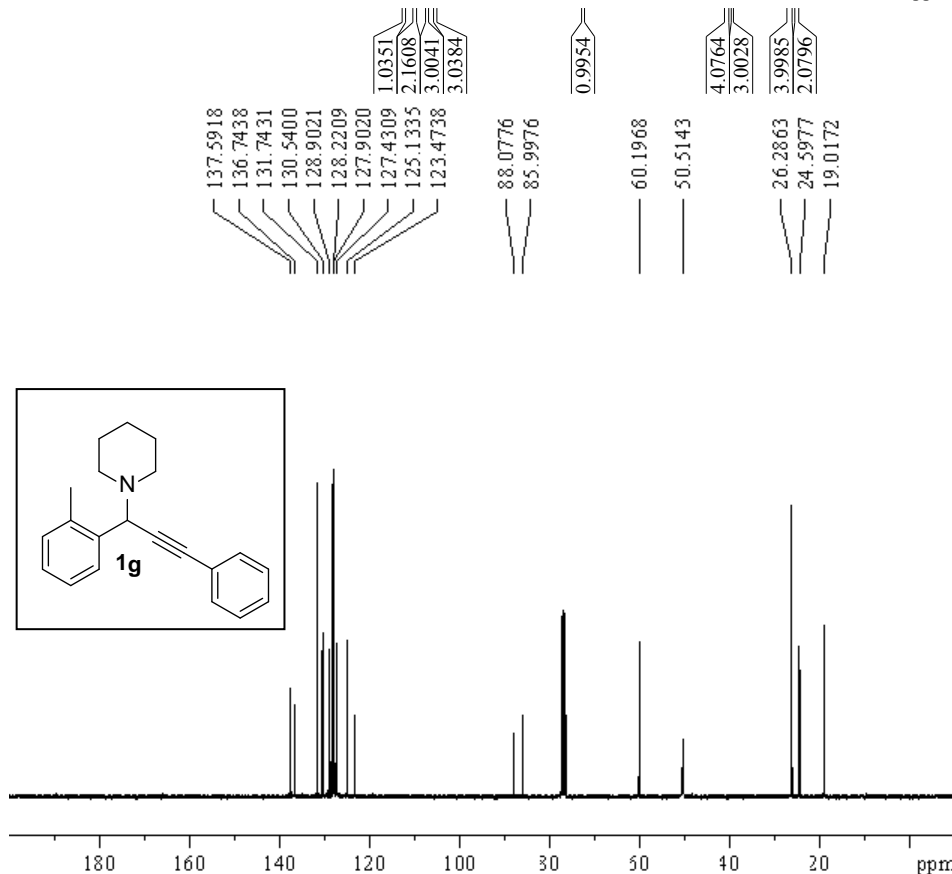

Current Data Parameters  
 NAME SNA ortho ch3 EBC  
 EXPNO 1  
 PROCNO 1

F2 - Acquisition Parameters  
 Date\_ 20130519  
 Time 17.44  
 INSTRUM spect  
 PROBHD 5 mm Multinucl  
 PULPROG zg30  
 TD 65536  
 SOLVENT CDCl3  
 NS 3000  
 DS 0  
 SWH 18832.292 Hz  
 FIDRES 0.287360 Hz  
 AQ 1.7400308 sec  
 RG 5792.6  
 DW 26.530 usec  
 DE 6.50 usec  
 TE 301.2 K  
 DI 1.5000000 sec  
 d11 0.0300000 sec  
 DELTA 1.39999998 sec  
 MCREST 0.0000000 sec  
 MCWRK 0.01500000 sec

==== CHANNEL f1 =====  
 NUC1 13C  
 P1 11.10 usec  
 PL1 0.00 dB  
 SFO1 75.4763998 MHz

==== CHANNEL f2 =====  
 CPDPRG2 waltz16  
 NUC2 1H  
 PCPD2 90.00 usec  
 PL2 0.00 dB  
 PL12 18.80 dB  
 PL13 21.80 dB  
 SFO2 300.1313006 MHz

F2 - Processing parameters  
 SI 32768  
 SF 754677.923 MHz  
 WDW EM  
 SSB 0  
 LB 1.00 Hz  
 GB 0  
 PC 1.00

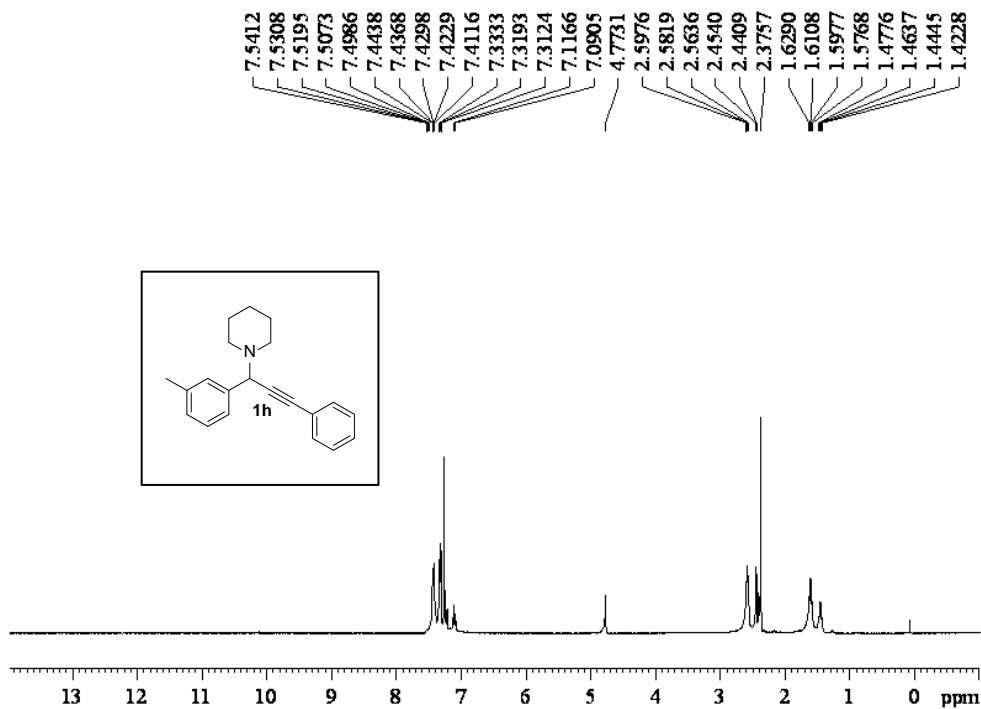

Current Data Parameters  
 NAME SNA.m.ch3 new HSagst  
 EXPNO 1  
 PROCNO 2

F2 - Acquisition Parameters  
 Date\_ 20130805  
 Time 11.53  
 INSTRUM spect  
 PROBHD 5 mm Multinucl  
 PULPROG zg30  
 TD 32768  
 SOLVENT CDCl3  
 NS 8  
 DS 0  
 SWH 4496.403 Hz  
 FIDRES 0.137219 Hz  
 AQ 3.6438515 sec  
 RG 724.1  
 DW 111.200 usec  
 DE 6.50 usec  
 TE 301.2 K  
 D1 1.5000000 sec  
 MCREST 0.0000000 sec  
 MCWRK 0.0150000 sec

===== CHANNEL f1 =====  
 NUC1 1H  
 P1 10.60 usec  
 PL1 0.00 dB  
 SFO1 300.1319508 MHz

F2 - Processing parameters  
 SI 16364  
 SF 300.1300063 MHz  
 WDW EM  
 SSB 0  
 LB 0.10 Hz  
 GB 0  
 PC 1.00

ID NMR plot parameters  
 CX 20.00 cm  
 CY 0.00 cm  
 FIP 13.970 ppm  
 F1 4192.77 Hz  
 F2 -1.012 ppm  
 F2 303.63 Hz  
 PPMCM 0.74908 ppm/cm  
 HZCM 224.82013 Hz/cm

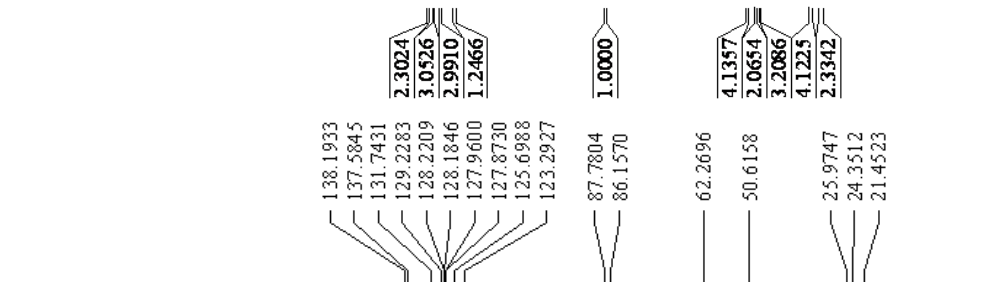

Current Data Parameters  
 NAME SNA.meta CH3 13C  
 EXPNO 1  
 PROCNO 1

F2 - Acquisition Parameters  
 Date\_ 20130519  
 Time 23.32  
 INSTRUM spect  
 PROBHD 5 mm Multinucl  
 PULPROG zgpg30  
 TD 65536  
 SOLVENT CDCl3  
 NS 256  
 DS 0  
 SWH 18832.393 Hz  
 FIDRES 0.287360 Hz  
 AQ 1.7400308 sec  
 RG 5792.6  
 DW 26.550 usec  
 DE 6.50 usec  
 TE 301.2 K  
 D1 1.5000000 sec  
 d11 0.0300000 sec  
 DELTA 1.3999999 sec  
 MCREST 0.0000000 sec  
 MCWRK 0.0150000 sec

===== CHANNEL f1 =====  
 NUC1 13C  
 P1 11.10 usec  
 PL1 0.00 dB  
 SFO1 75.4763978 MHz

===== CHANNEL f2 =====  
 CFDP2 waltz16  
 NUC2 1H  
 PCPD2 90.00 usec  
 PL2 0.00 dB  
 PL12 18.80 dB  
 PL13 21.80 dB  
 SFO2 300.1313506 MHz

F2 - Processing parameters  
 SI 32768  
 SF 75.4677574 MHz  
 WDW EM  
 SSB 0  
 LB 1.00 Hz  
 GB 0  
 PC 1.00

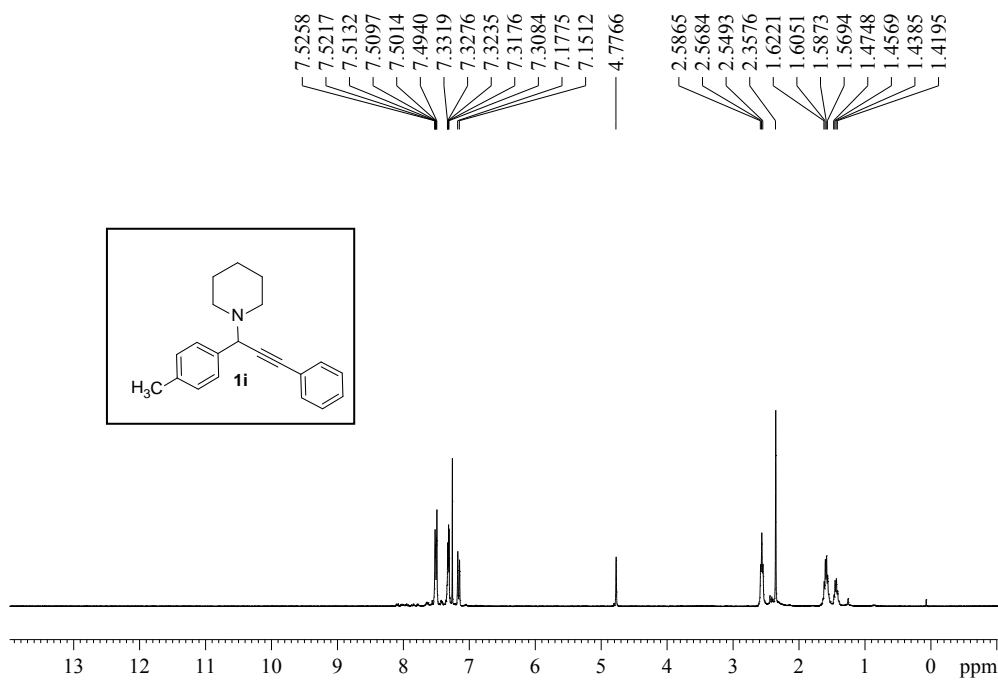

Current Data Parameters  
 NAME SNA p toulaldehyde  
 EXPNO 1  
 PROCNO 2

F2 - Acquisition Parameters  
 Date\_ 20130521  
 Time 19.07  
 INSTRUM spect  
 PROBHD 5 mm Multinucl  
 PULPROG zg30  
 TD 32768  
 SOLVENT CDCl3  
 NS 8  
 DS 0  
 SWH 4496.403 Hz  
 FIDRES 0.137219 Hz  
 AQ 3.6438515 sec  
 RG 724.1  
 DW 111.200 usec  
 DE 6.50 usec  
 TE 301.2 K  
 D1 1.50000000 sec  
 MCREST 0.00000000 sec  
 MCWRK 0.01500000 sec

===== CHANNEL f1 =====  
 NUC1 1H  
 P1 10.60 usec  
 PL1 0.00 dB  
 SFO1 300.1319508 MHz  
 F2 - Processing parameters  
 SI 16384  
 SF 300.1300063 MHz  
 WDW EM  
 SSB 0  
 LB 0.10 Hz  
 GB 0  
 PC 1.00

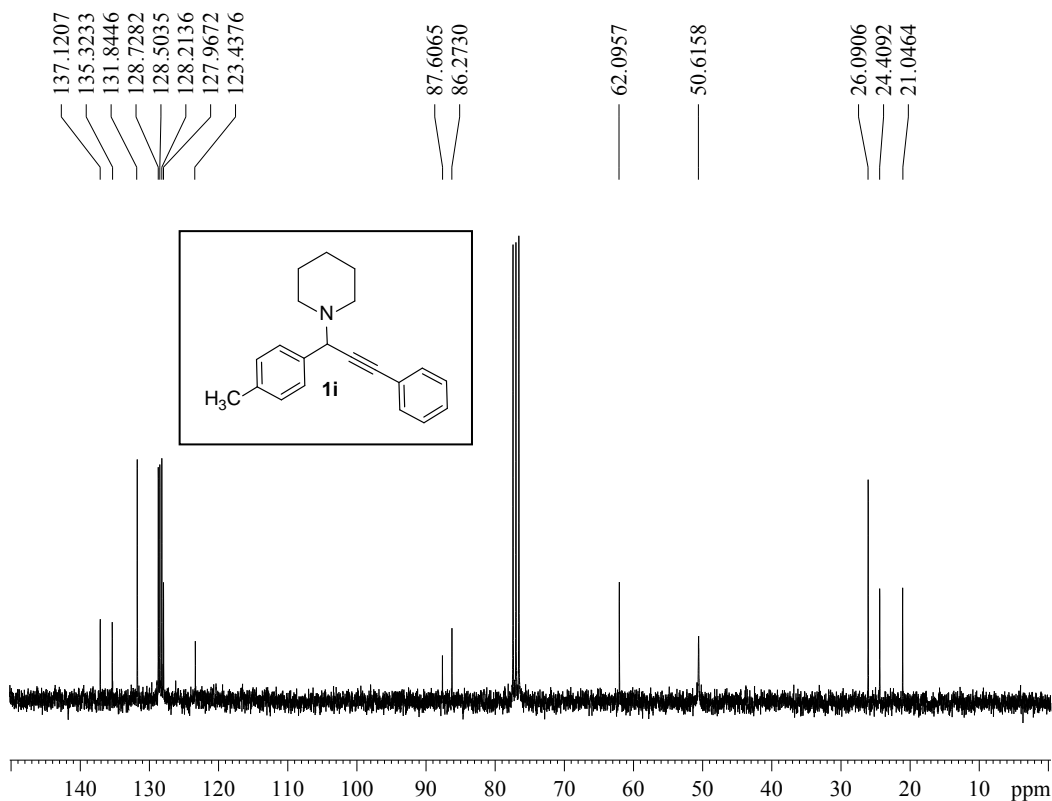

Current Data Parameters  
 NAME SNA para ch3 13C  
 EXPNO 1  
 PROCNO 1

F2 - Acquisition Parameters  
 Date\_ 20130520  
 Time 15.40  
 INSTRUM spect  
 PROBHD 5 mm Multinucl  
 PULPROG zgpg30  
 TD 65536  
 SOLVENT CDCl3  
 NS 520  
 DS 0  
 SWH 18832.393 Hz  
 FIDRES 0.287360 Hz  
 AQ 1.7400308 sec  
 RG 8192  
 DW 26.550 usec  
 DE 6.50 usec  
 TE 301.2 K  
 D1 1.50000000 sec  
 d11 0.03000000 sec  
 DELTA 1.39999998 sec  
 MCREST 0.00000000 sec  
 MCWRK 0.01500000 sec

===== CHANNEL f1 =====  
 NUC1 13C  
 P1 11.10 usec  
 PL1 0.00 dB  
 SFO1 75.4763978 MHz

===== CHANNEL f2 =====  
 CPDPRG2 waltz16  
 NUC2 1H  
 PCPD2 90.00 usec  
 PL2 0.00 dB  
 PL12 18.80 dB  
 PL13 21.80 dB  
 SFO2 300.1313506 MHz  
 F2 - Processing parameters  
 SI 32768  
 SF 75.4677534 MHz  
 WDW EN  
 SSB 0  
 LB 1.00 Hz  
 GB 0  
 PC 1.00



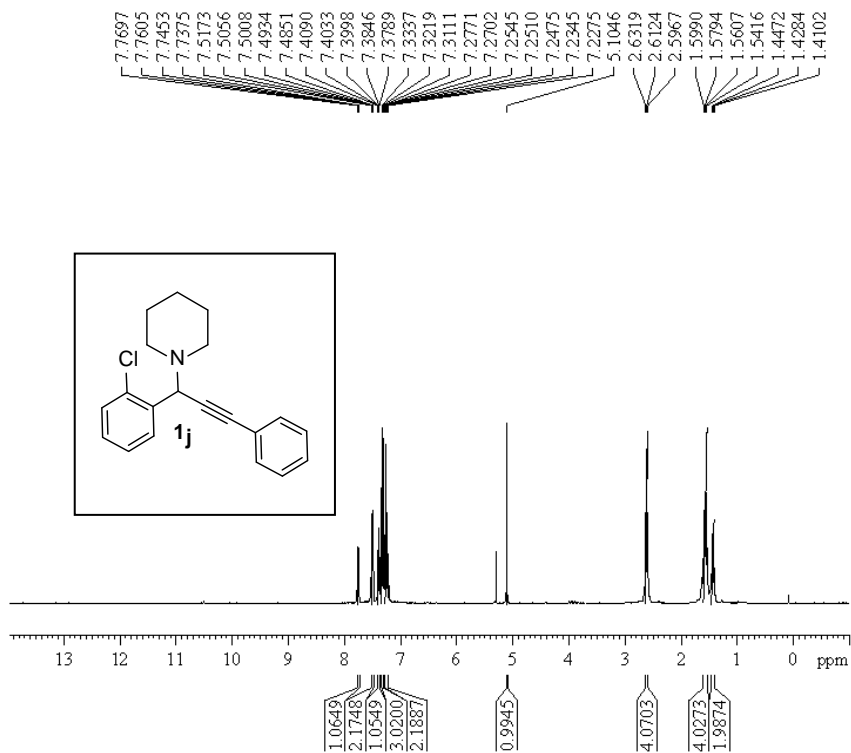

Current Data Parameters  
 NAME SNA 2-clHNMR  
 EXPNO 2  
 PROCNO 1

F2 - Acquisition Parameters  
 Date\_ 20130621  
 Time 9.40  
 INSTRUM spect  
 PROBHD 5 mm Multinucl  
 PULPROG zg30  
 TD 32768  
 SOLVENT CDCl3  
 NS 8  
 DS 0  
 SWH 4496.403 Hz  
 FIDRES 0.137219 Hz  
 AQ 3.6438515 sec  
 RG 362  
 DW 111.200 usec  
 DE 6.50 usec  
 TE 300.2 K  
 D1 1.5000000 sec  
 MCREST 0.0000000 sec  
 MCWRK 0.0150000 sec

===== CHANNEL f1 =====  
 NUC1 1H  
 P1 10.60 usec  
 PL1 0.00 dB  
 SFO1 300.1319508 MHz

F2 - Processing parameters  
 SI 16384  
 SF 300.130066 MHz  
 WDW EM  
 SSB 0  
 LB 0.10 Hz  
 GB 0  
 PC 1.00

IDNMR plot parameters  
 CX 20.00 cm  
 CY 0.00 cm  
 F1 13.989 ppm  
 F2 4192.47 Hz  
 F2P -1.013 ppm  
 F2 -303.93 Hz  
 PPMCM 0.7498 ppm/cm  
 HZCM 224.82013 Hz/cm

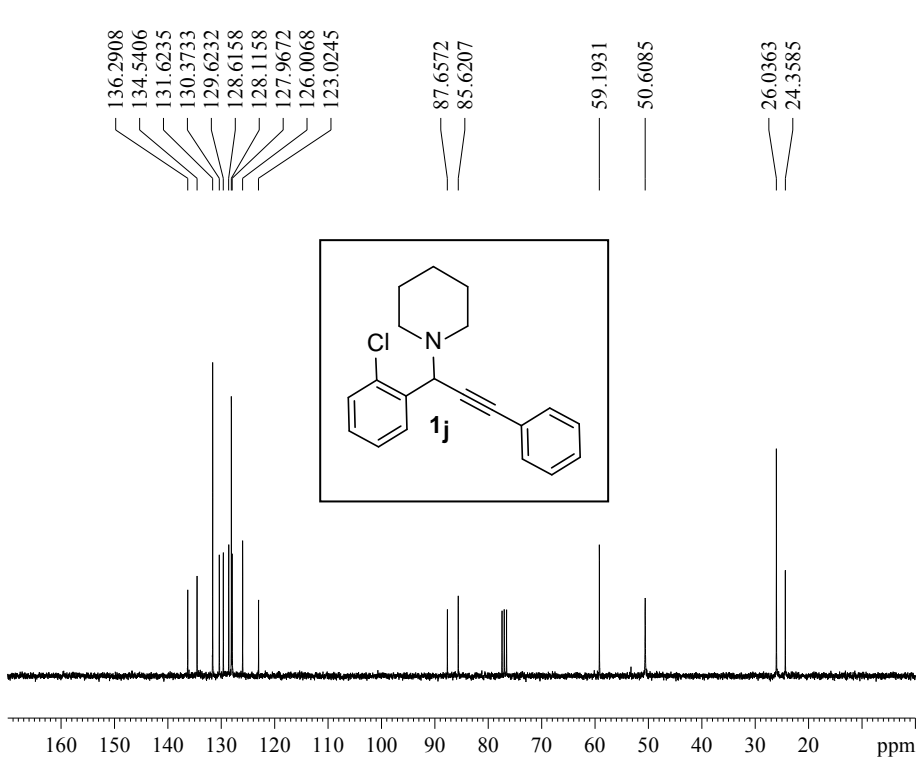

Current Data Parameters  
 NAME 2-cl 13C n  
 EXPNO 1  
 PROCNO 1

F2 - Acquisition Parameters  
 Date\_ 20130621  
 Time 14.42  
 INSTRUM spect  
 PROBHD 5 mm Multinucl  
 PULPROG zgpg30  
 TD 65536  
 SOLVENT CDCl3  
 NS 100  
 DS 0  
 SWH 18832.393 Hz  
 FIDRES 0.287360 Hz  
 AQ 1.7400308 sec  
 RG 13004  
 DW 26.550 usec  
 DE 6.50 usec  
 TE 300.2 K  
 D1 1.5000000 sec  
 d11 0.0300000 sec  
 DELTA 1.39999998 sec  
 MCREST 0.0000000 sec  
 MCWRK 0.0150000 sec

===== CHANNEL f1 =====  
 NUC1 13C  
 P1 11.10 usec  
 PL1 0.00 dB  
 SFO1 75.4763978 MHz

===== CHANNEL f2 =====  
 CPDPRG2 waltz16  
 NUC2 1H  
 PCPD2 90.00 usec  
 PL2 0.00 dB  
 PL12 18.80 dB  
 PL13 21.80 dB  
 SFO2 300.1313506 MHz

F2 - Processing parameters  
 SI 32768  
 SF 75.4677701 MHz  
 WDW EM  
 SSB 0  
 LB 1.00 Hz  
 GB 0  
 PC 1.00

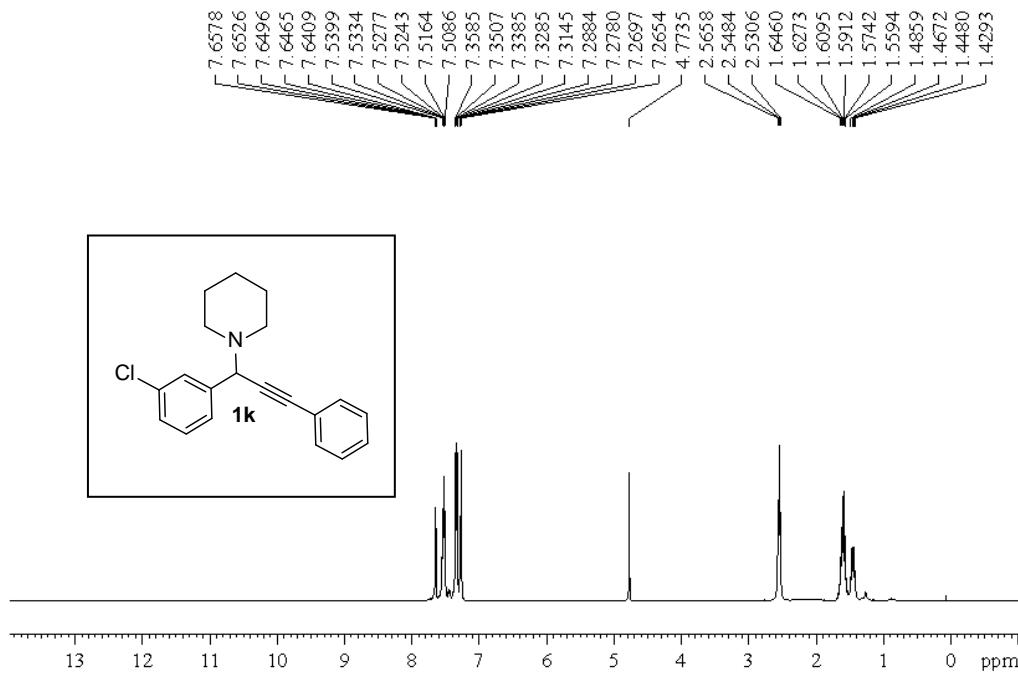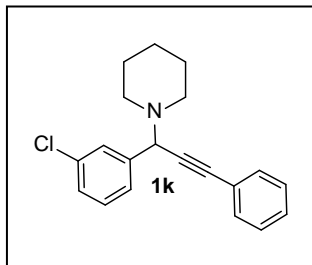

Current Data Parameters  
NAME SNA 349 Iproton  
EXPNO 2  
PROCNO 1

F2 - Acquisition Parameters  
Date\_ 20130403  
Time 18.06  
INSTRUM spect  
PROBHD 5 mm Multinucl  
PULPROG zg30  
TD 32768  
SOLVENT CDCl3  
NS 20  
DS 0  
SWH 496.403 Hz  
FIDRES 0.137219 Hz  
AQ 3.6438515 sec  
RG 574.7  
DW 111.200 usec  
DE 6.50 usec  
TE 296.2 K  
D1 1.5000000 sec  
MCREST 0.0000000 sec  
MCWRK 0.0150000 sec

===== CHANNEL f1 =====  
NUC1 1H  
P1 10.60 usec  
PL1 0.00 dB  
SFO1 300.1319508 MHz

F2 - Processing parameters  
SI 16384  
SF 300.1300063 MHz  
WDW EM  
SSB 0  
LB 1.0 Hz  
GB 0  
PC 1.00

ID NMR plot parameters  
CX 20.00 cm  
CY 0.00 cm  
F1 13.970 ppm  
F2 4192.77 Hz  
F3 -1.012 ppm  
F4 -303.63 Hz  
PPMCM 0.7408 ppm/cm  
HZCM 22482014 Hz/cm

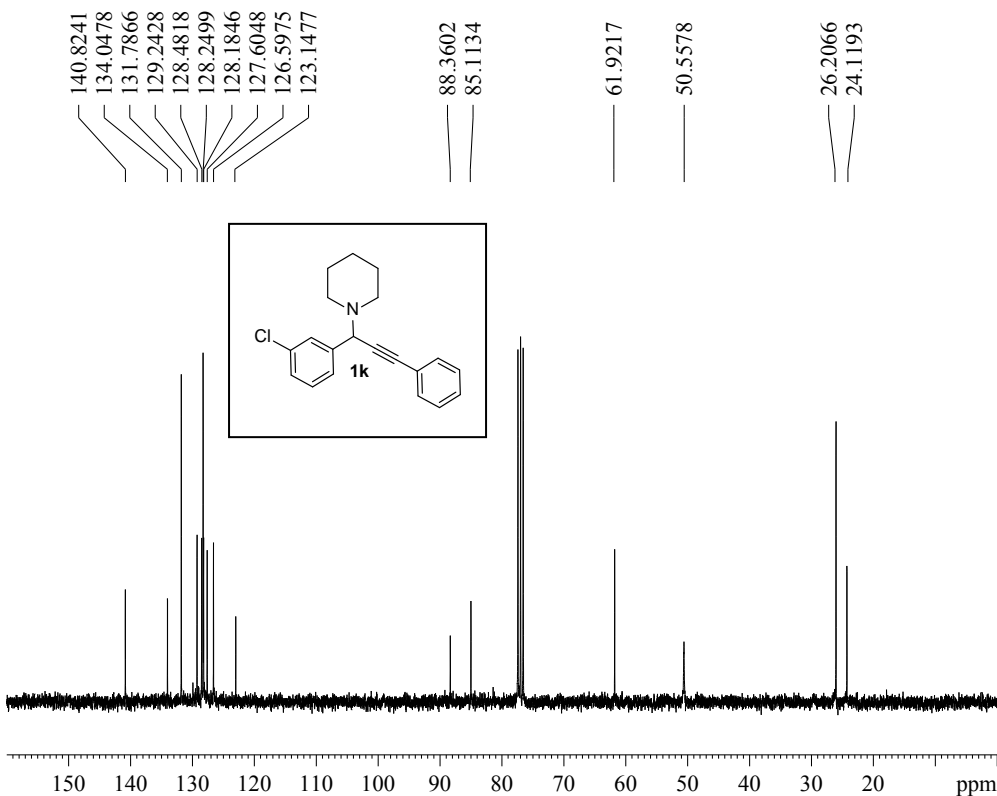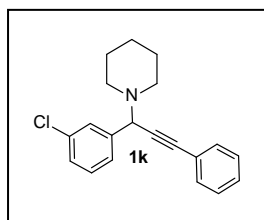

Current Data Parameters  
NAME SNA 349 3c1 13C  
EXPNO 1  
PROCNO 1

F2 - Acquisition Parameters  
Date\_ 20130512  
Time 18.59  
INSTRUM spect  
PROBHD 5 mm Multinucl  
PULPROG zgpg30  
TD 65536  
SOLVENT CDCl3  
NS 500  
DS 0  
SWH 18832.393 Hz  
FIDRES 0.287360 Hz  
AQ 1.7400308 sec  
RG 5792.6  
DW 26.550 usec  
DE 6.50 usec  
TE 300.2 K  
D1 1.5000000 sec  
dH 0.0300000 sec  
DELTA 1.3999998 sec  
MCREST 0.0000000 sec  
MCWRK 0.0150000 sec

===== CHANNEL f1 =====  
NUC1 13C  
P1 11.10 usec  
PL1 0.00 dB  
SFO1 75.4763978 MHz

===== CHANNEL f2 =====  
CPDPRG2 waltz16  
NUC2 1H  
PCPD2 90.00 usec  
PL2 0.00 dB  
PL12 18.80 dB  
PL13 21.80 dB  
SFO2 300.1313506 MHz

F2 - Processing parameters  
SI 32768  
SF 75.4677549 MHz  
WDW EM  
SSB 0  
LB 1.00 Hz  
GB 0  
PC 1.00

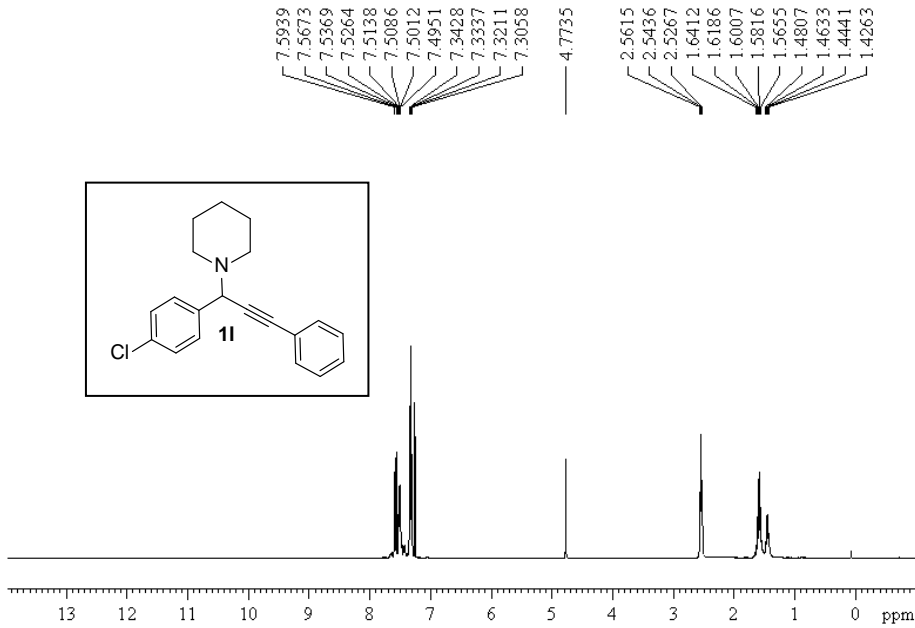

Current Data Parameters  
 NAME SNA 4 CIH b  
 EXPNO 1  
 PROCNO 2

F2 - Acquisition Parameters  
 Date\_ 20130521  
 Time 19.43  
 INSTRUM spect  
 PROBHD 5 mm Multinucl  
 PULPROG zg30  
 TD 32768  
 SOLVENT CDCl3  
 NS 8  
 DS 0  
 SWH 4496.403 Hz  
 FIDRES 0.137219 Hz  
 AQ 3.6438515 sec  
 RG 724.1  
 DW 111.200 usec  
 DE 6.50 usec  
 TE 301.2 K  
 D1 1.5000000 sec  
 MCREST 0.0000000 sec  
 MCWRK 0.0150000 sec

===== CHANNEL f1 =====  
 NUC1 1H  
 P1 10.60 usec  
 PL1 0.00 dB  
 SFO1 300.1319508 MHz

F2 - Processing parameters  
 SI 16384  
 SF 300.1300057 MHz  
 WDW EM  
 SSB 0  
 LB 0.10 Hz  
 GB 0  
 PC 1.00

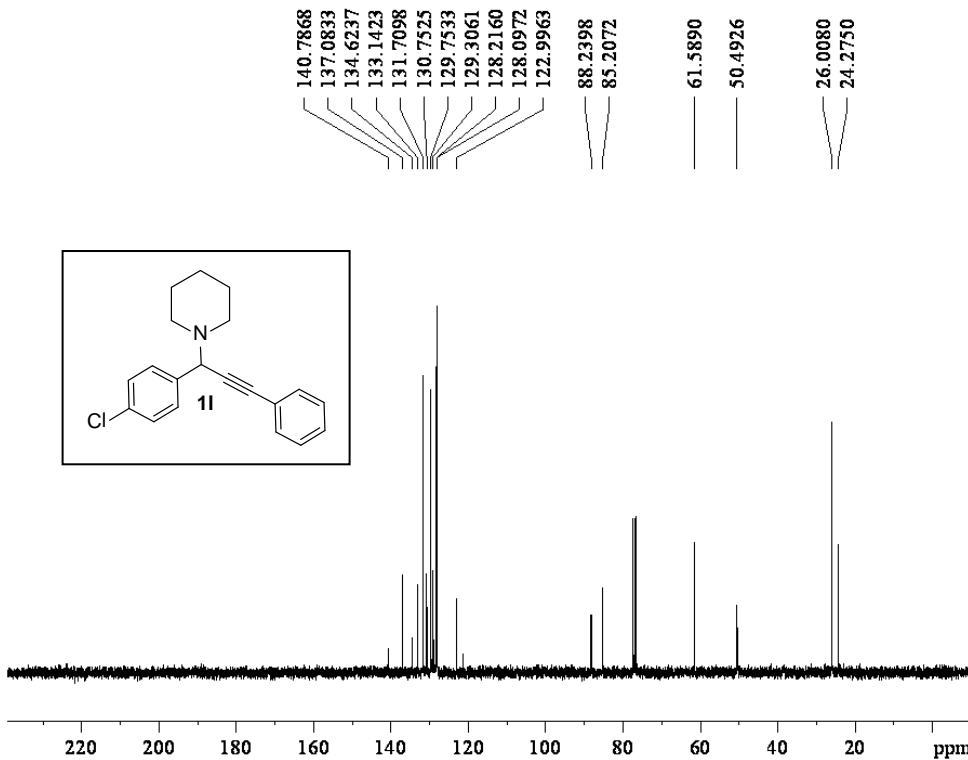

Current Data Parameters  
 NAME SNA 347 13C p gla  
 EXPNO 1  
 PROCNO 1

F2 - Acquisition Parameters  
 Date\_ 20130517  
 Time 19.56  
 INSTRUM spect  
 PROBHD 5 mm Multinucl  
 PULPROG zgpg30  
 TD 65536  
 SOLVENT CDCl3  
 NS 276  
 DS 0  
 SWH 18832.393 Hz  
 FIDRES 0.287360 Hz  
 AQ 1.7400308 sec  
 RG 14596.5  
 DW 26.550 usec  
 DE 6.50 usec  
 TE 301.2 K  
 D1 1.5000000 sec  
 d11 0.0300000 sec  
 DELTA 1.3999998 sec  
 MCREST 0.0000000 sec  
 MCWRK 0.0150000 sec

===== CHANNEL f1 =====  
 NUC1 13C  
 P1 11.10 usec  
 PL1 0.00 dB  
 SFO1 75.4763978 MHz

===== CHANNEL f2 =====  
 CPDPRG2 waltz16  
 NUC2 1H  
 PCPD2 90.00 usec  
 PL2 0.00 dB  
 PL12 18.80 dB  
 PL13 21.80 dB  
 SFO2 300.1313506 MHz

F2 - Processing parameters  
 SI 32768  
 SF 75.4677517 MHz  
 WDW EM  
 SSB 0  
 LB 1.00 Hz  
 GB 0  
 PC 1.00

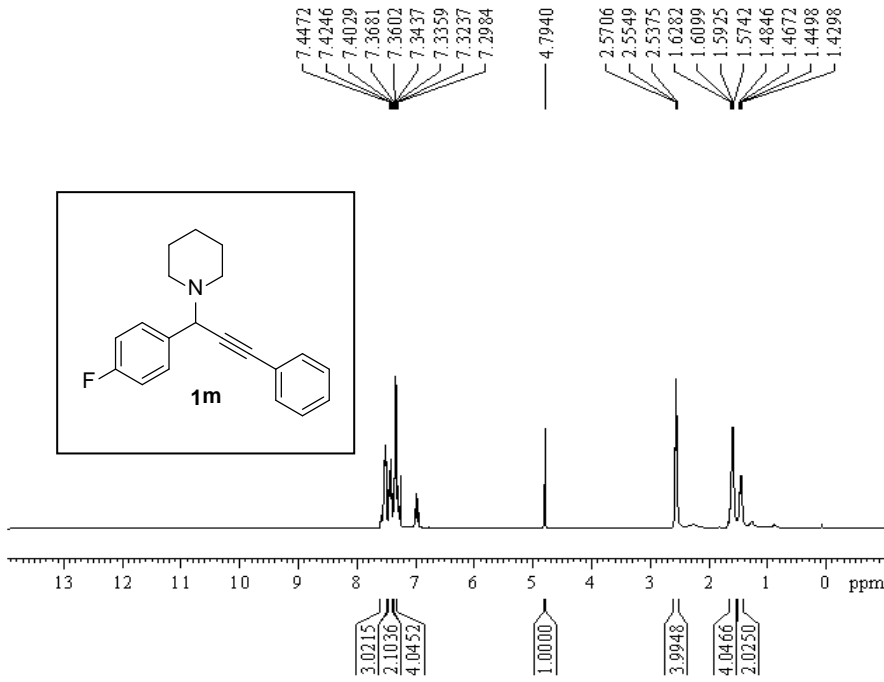

Current Data Parameters  
 NAME SNA 354 proton  
 EXPNO 1  
 PROCNO 1  
 F2 - Acquisition Parameters  
 Date\_ 20130322  
 Time 16.22  
 INSTRUM spect  
 PROBD 5 mm Multinuc  
 PULPROG zg30  
 TD 32768  
 SOLVENT CDCl3  
 NS 20  
 DS 0  
 SWH 4496.403 Hz  
 FIDRES 0.137219 Hz  
 AQ 3.6438515 sec  
 RG 4561  
 DW 111.200 usec  
 DE 6.50 usec  
 TE 298.2 K  
 D1 1.5000000 sec  
 MCREST 0.0000000 sec  
 MCWRK 0.01500000 sec

==== CHANNEL f1 =====  
 NUC1 1H  
 P1 10.60 usec  
 PL1 0.00 dB  
 SFO1 300.1319508 MHz  
 F2 - Processing parameters  
 SI 16384  
 SF 300.1300065 MHz  
 WDWW EM  
 SSB 0  
 LB 0.10 Hz  
 GB 0  
 PC 1.00  
 1D NMR plot parameters  
 CX 20.00 cm  
 CY 0.00 cm  
 F1P 13.969 ppm  
 F1 4192.50 Hz  
 F2P -1.013 ppm  
 F2 -303.90 Hz  
 FPMCM 0.74908 ppm/cm  
 HZ CM 224.82013 Hz/cm

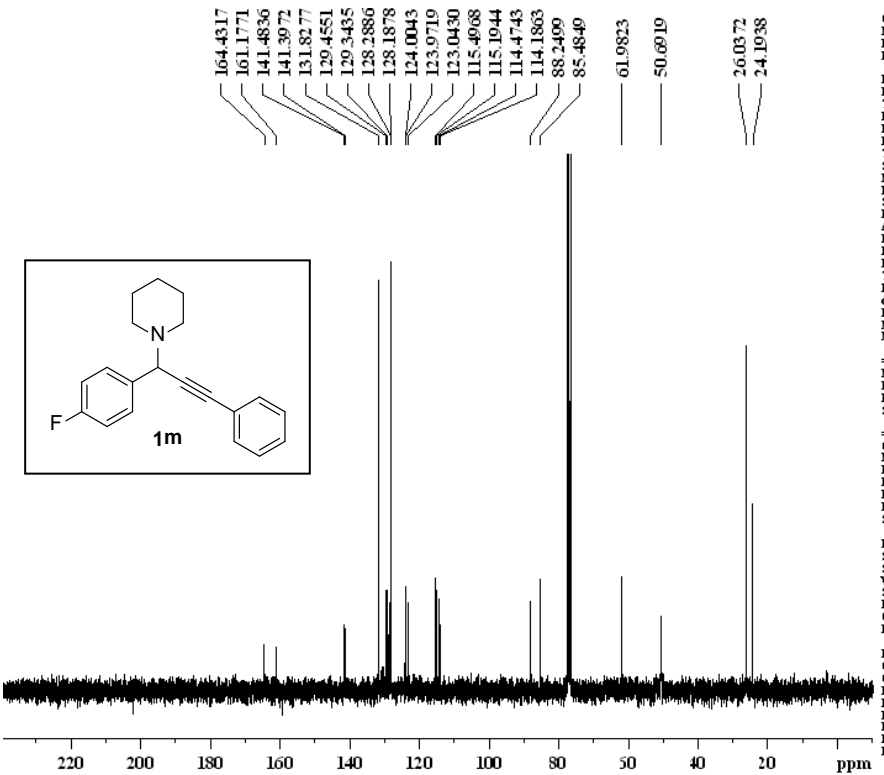

Current Data Parameters  
 NAME SNA 344 13C 4F  
 EXPNO 2  
 PROCNO 1  
 F2 - Acquisition Parameters  
 Date\_ 20130511  
 Time 11.04  
 INSTRUM spect  
 PROBD 5 mm Multinuc  
 PULPROG zgpg30  
 TD 65536  
 SOLVENT CDCl3  
 NS 913  
 DS 0  
 SWH 18832.393 Hz  
 FIDRES 0.287360 Hz  
 AQ 1.7460308 sec  
 RG 18390.4  
 DW 26.550 usec  
 DE 6.50 usec  
 TE 300.2 K  
 D1 1.5000000 sec  
 d11 0.03000000 sec  
 DELTA 1.39999998 sec  
 MCREST 0.00000000 sec  
 MCWRK 0.01500000 sec

==== CHANNEL f1 =====  
 NUC1 13C  
 P1 11.10 usec  
 PL1 0.00 dB  
 SFO1 75.4763978 MHz  
 ==== CHANNEL f2 =====  
 CPDPRG2 waltz16  
 NUC2 1H  
 PCPD2 90.00 usec  
 PL2 0.00 dB  
 PL12 18.80 dB  
 PL13 21.80 dB  
 SFO2 300.1313506 MHz  
 F2 - Processing parameters  
 SI 32768  
 SF 75.4677488 MHz  
 WDWW EM  
 SSB 0  
 LB 1.00 Hz  
 GB 0  
 PC 1.00  
 1D NMR plot parameters  
 CX 20.00 cm  
 CY 12.50 cm  
 F1P 239.276 ppm  
 F1 18065.17 Hz  
 F2P -10.166 ppm  
 F2 -767.22 Hz  
 FPMCM 12.47211 ppm/cm  
 HZ CM 941.61957 Hz/cm

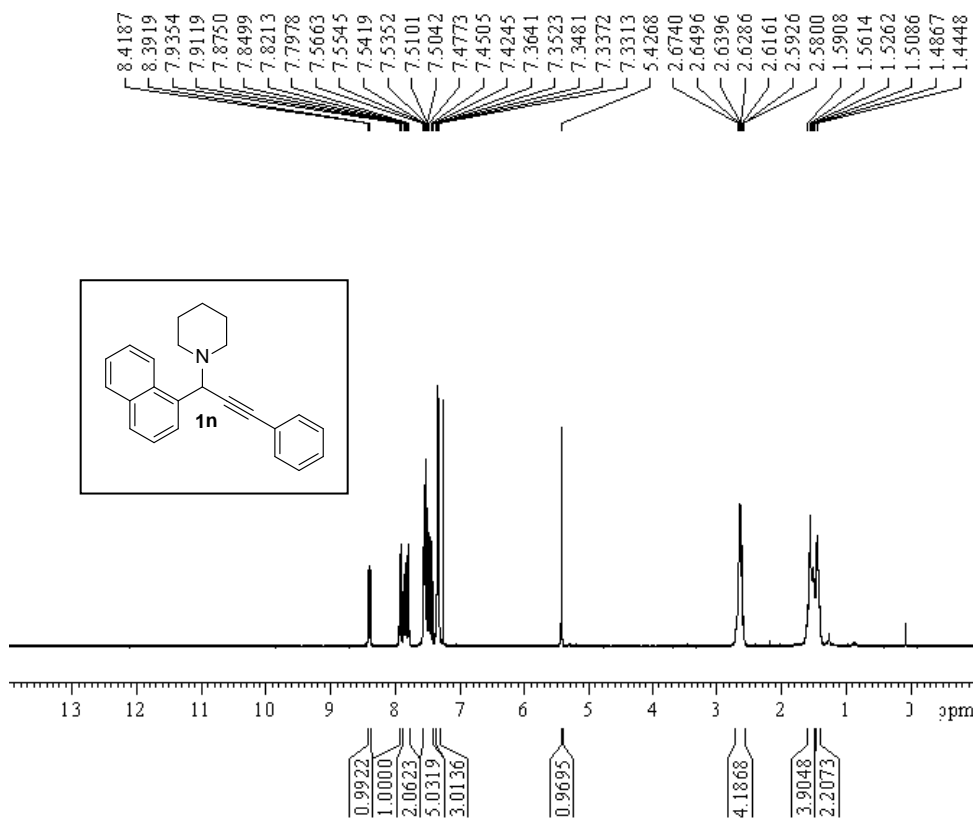

Current Data Parameters  
 NAME SNA 360 proton.nmr  
 EXPNO 2  
 PROCNO 1

F2 - Acquisition Parameters  
 Date\_ 20130321  
 Time 14.10  
 INSTRUM spect  
 PROBHD 5 mm Multinuc  
 PULPROG zg30  
 TD 32768  
 SOLVENT CDCl3  
 NS 20  
 DS 0  
 SWH 4496.403 Hz  
 FIDRES 0.137219 Hz  
 AQ 3.6438515 sec  
 RG 912.3  
 DRY 111.200 usec  
 DE 6.50 usec  
 TE 297.2 K  
 D1 1.50000000 sec  
 MCREST 0.00000000 sec  
 MCWRRK 0.01500000 sec

==== CHANNEL f1 =====  
 NUC1 1H  
 P1 10.60 usec  
 PL1 0.00 dB  
 SFO1 300.1319508 MHz

F2 - Processing parameters  
 SI 16384  
 SF 300.1300076 MHz  
 WDW EM  
 SSB 0  
 LB 0.10 Hz  
 GB 0  
 PC 1.00

ID NMR plot parameters  
 CX 20.00 cm  
 CY 0.00 cm  
 FIP 13.965 ppm  
 FI 4191.40 Hz  
 F2P -1.016 ppm  
 F2 -305.00 Hz  
 PPMCM 0.74908 ppm/cm  
 HZCM 224.82013 Hz/cm

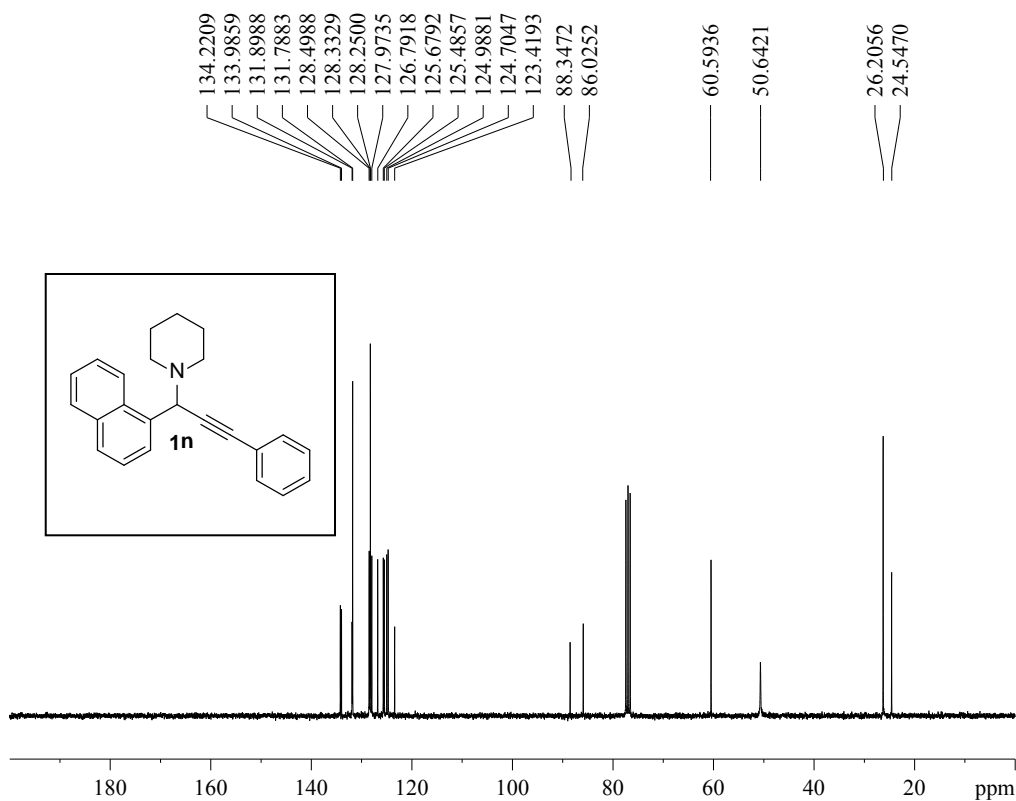

Current Data Parameters  
 NAME SNA 359 13C  
 EXPNO 2  
 PROCNO 1

F2 - Acquisition Parameters  
 Date\_ 20130511  
 Time 3.37  
 INSTRUM spect  
 PROBHD 5 mm Multinuc  
 PULPROG zgpg30  
 TD 65536  
 SOLVENT CDCl3  
 NS 1000  
 DS 0  
 SWH 1883.393 Hz  
 FIDRES 0.287360 Hz  
 AQ 1.7400308 sec  
 RG 18390.4  
 DW 26.550 usec  
 DE 6.50 usec  
 TE 299.2 K  
 D1 1.50000000 sec  
 d11 0.03000000 sec  
 DELTA 1.39999998 sec  
 MCREST 0.00000000 sec  
 MCWRRK 0.01500000 sec

==== CHANNEL f1 =====  
 NUC1 13C  
 P1 11.10 usec  
 PL1 0.00 dB  
 SFO1 75.4763978 MHz

==== CHANNEL f2 =====  
 CPDPRG2 waltz16  
 NUC2 1H  
 PCPD2 90.00 usec  
 PL2 0.00 dB  
 PL12 18.80 dB  
 PL13 21.80 dB  
 SFO2 300.1313506 MHz

F2 - Processing parameters  
 SI 32768  
 SF 75.4677534 MHz  
 WDW EM  
 SSB 0  
 LB 1.00 Hz  
 GB 0  
 PC 1.00

ID NMR plot parameters  
 CX 20.00 cm  
 CY 12.50 cm  
 FIP 239.315 ppm  
 FI 18060.58 Hz  
 F2P -10.227 ppm  
 F2 -771.81 Hz  
 PPMCM 12.47711 ppm/cm  
 HZCM 941.61951 Hz/cm

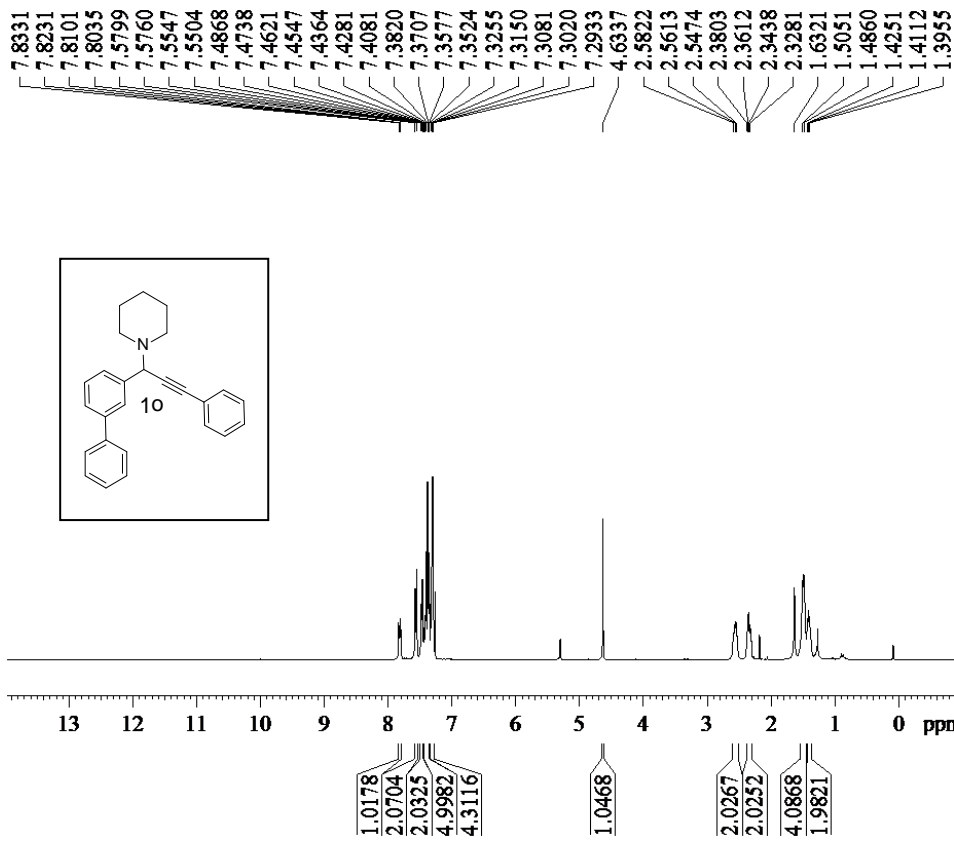

Current Data Parameters  
 NAME SNA 380.1 proton  
 EXPNO 1  
 PROCNO 1

F2 - Acquisition Parameters  
 Date\_ 20130403  
 Time 14.27  
 INSTRUM spect  
 PROBHD 5 mm Multinucl  
 PULPROG zg30  
 TD 32768  
 SOLVENT CDCl3  
 NS 20  
 DS 0  
 SWH 4496.403 Hz  
 FIDRES 0.137219 Hz  
 AQ 3.6438515 sec  
 RG 406.4  
 DW 111.200 usec  
 DE 6.50 usec  
 TE 297.2 K  
 D1 1.50000000 sec  
 MCREST 0.00000000 sec  
 MCWKK 0.01500000 sec

CHANNEL f1  
 NUC1 1H  
 P1 10.60 usec  
 PL1 0.00 dB  
 SFO1 300.1319508 MHz

F2 - Processing parameters  
 SI 16384  
 SF 300.1300065 MHz  
 WDW EM  
 SSB 0  
 LB 0.10 Hz  
 GB 0  
 PC 1.00

1D NMR plot parameters  
 CX 20.00 cm  
 CY 0.00 cm  
 F1P 13.969 ppm  
 F1 4192.50 Hz  
 F2P -1.013 ppm  
 F2 -303.90 Hz  
 PPMCM 0.74908 ppm/cm  
 HZCM 224.82015 Hz/cm

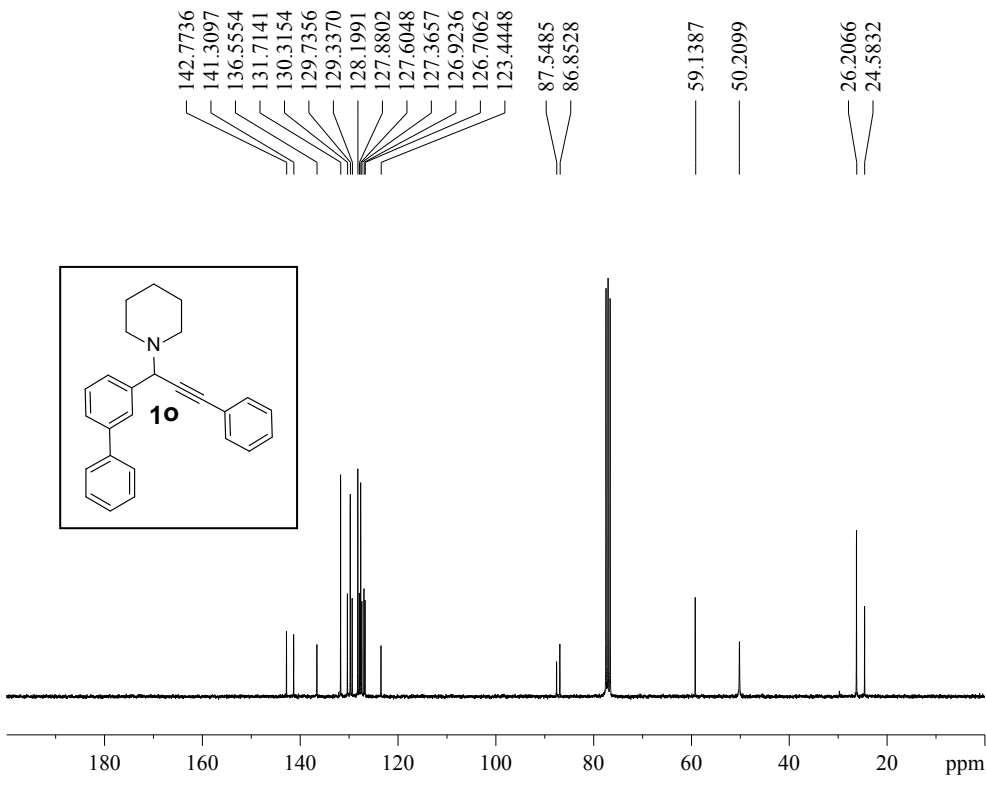

Current Data Parameters  
 NAME SNA 380 biphenyl13C  
 EXPNO 1  
 PROCNO 1

F2 - Acquisition Parameters  
 Date\_ 20130519  
 Time 10.24  
 INSTRUM spect  
 PROBHD 5 mm Multinucl  
 PULPROG zgpg30  
 TD 65536  
 SOLVENT CDCl3  
 NS 11198  
 DS 0  
 SWH 18832.393 Hz  
 FIDRES 0.287360 Hz  
 AQ 1.7400308 sec  
 RG 5792.6  
 DW 26.550 usec  
 DE 6.50 usec  
 TE 301.2 K  
 D1 1.50000000 sec  
 d11 0.03000000 sec  
 DELTA 1.39999999 sec  
 MCREST 0.00000000 sec  
 MCWKK 0.01500000 sec

CHANNEL f1  
 NUC1 13C  
 P1 11.10 usec  
 PL1 0.00 dB  
 SFO1 75.4763978 MHz

CHANNEL f2  
 CPDPRG2 waltz16  
 NUC2 1H  
 PCPD2 90.00 usec  
 PL2 0.00 dB  
 PL12 18.80 dB  
 PL13 21.80 dB  
 SFO2 300.1313506 MHz

F2 - Processing parameters  
 SI 32768  
 SF 75.4677511 MHz  
 WDW EM  
 SSB 0  
 LB 1.00 Hz  
 GB 0  
 PC 1.00

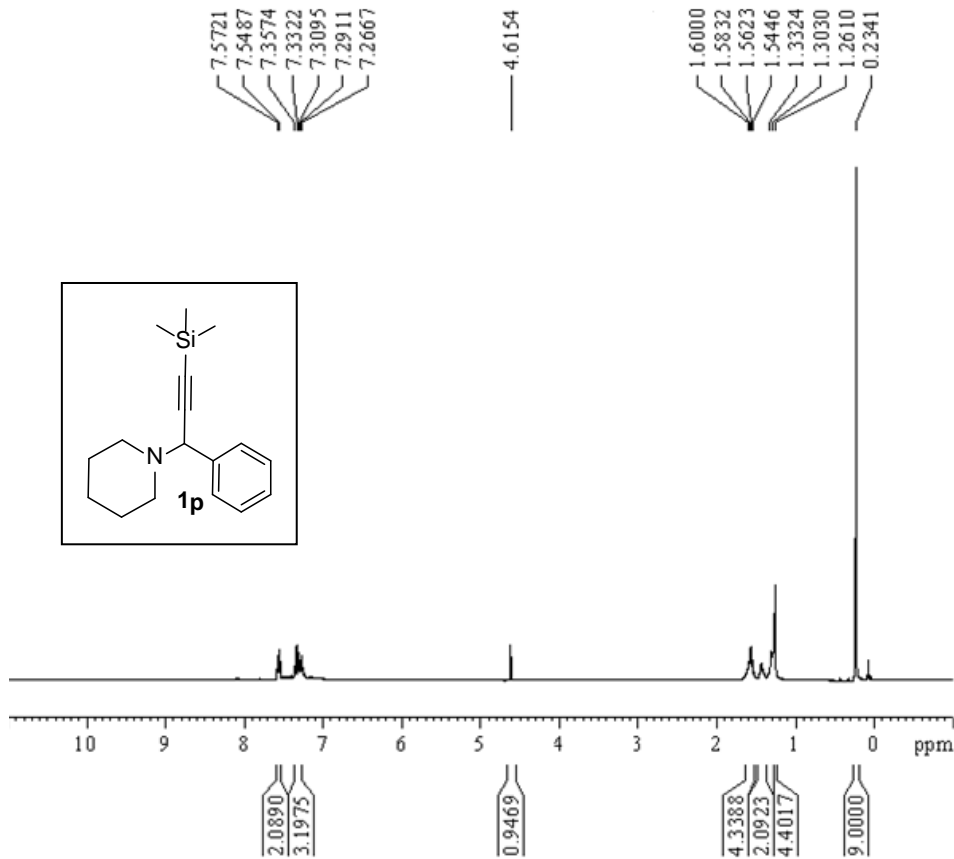

Current Data Parameters  
 NAME SNA 372 proton  
 EXPNO 1  
 PROCNO 1

F2 - Acquisition Parameters  
 Date\_ 20130320  
 Time 22.00  
 INSTRUM spect  
 PROBHD 5mm Multinuc1  
 PULPROG zg30  
 TD 32768  
 SOLVENT CDCl3  
 NS 20  
 DS 0  
 SWH 4496.403 Hz  
 FIDRES 0.137219 Hz  
 AQ 3.6438515 sec  
 RG 267.4  
 DW 111.200 usec  
 DE 6.50 usec  
 TE 298.2 K  
 D1 1.50000000 sec  
 MCREST 0.00000000 sec  
 MCWRK 0.01500000 sec

===== CHANNEL f1 =====  
 NUC1 1H  
 P1 10.60 usec  
 PL1 0.00 dB  
 SF01 300.1319508 MHz

F2 - Processing parameters  
 SI 16384  
 SF 300.1300657 MHz  
 WDW EM  
 SSB 0  
 LB 0.10 Hz  
 GB 0  
 PC 1.00

1D NMR plot parameters  
 CX 20.00 cm  
 CY 0.00 cm  
 F1P 13.972 ppm  
 F1 -0.9332 Hz  
 F2P -1.610 ppm  
 F2 -303.08 Hz  
 PPMCM 0.74908 ppm/cm  
 HZCM 224.82013 Hz/cm

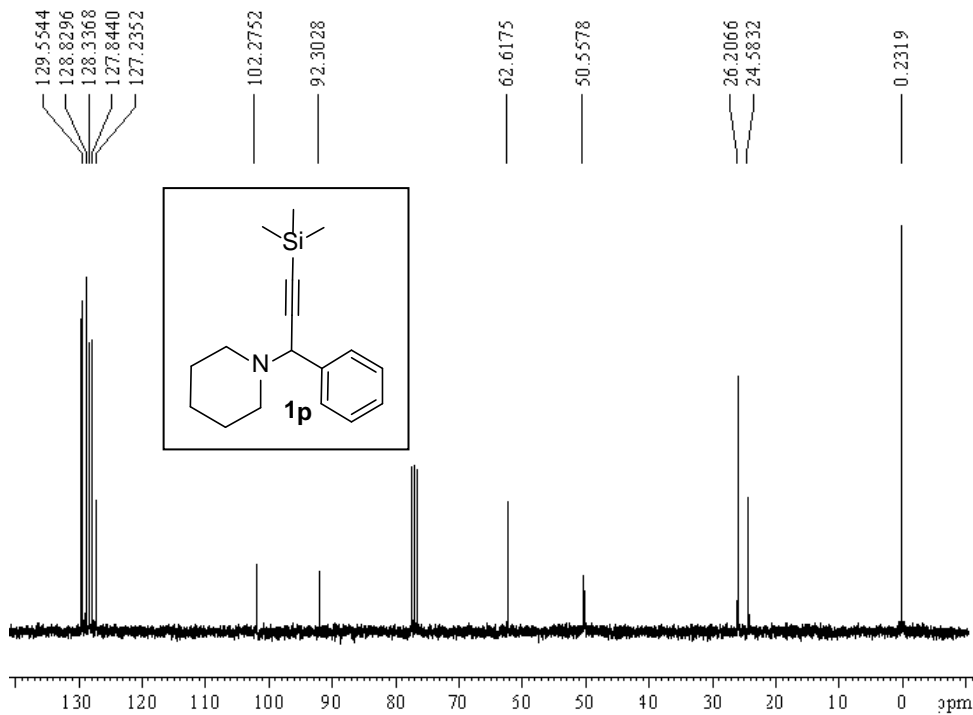

Current Data Parameters  
 NAME SNA TMS 13C  
 EXPNO 1  
 PROCNO 1

F2 - Acquisition Parameters  
 Date\_ 20130320  
 Time 18.37  
 INSTRUM spect  
 PROBHD 5mm Multinuc1  
 PULPROG zgpg30  
 TD 65536  
 SOLVENT CDCl3  
 NS 256  
 DS 0  
 SWH 18432.393 Hz  
 FIDRES 0.287360 Hz  
 AQ 1.7409308 sec  
 RG 13604  
 DW 26.550 usec  
 DE 6.50 usec  
 TE 301.2 K  
 D1 1.50000000 sec  
 d11 0.03000000 sec  
 DELTA 1.39999998 sec  
 MCREST 0.00000000 sec  
 MCWRK 0.01500000 sec

===== CHANNEL f1 =====  
 NUC1 13C  
 P1 11.10 usec  
 PL1 0.00 dB  
 SF01 75.4763978 MHz

===== CHANNEL f2 =====  
 CPDPRG2 waltz16  
 NUC2 1H  
 P2PRG2 90.00 usec  
 PL2 0.00 dB  
 PL12 18.80 dB  
 PL13 21.80 dB  
 SF02 300.1313506 MHz

F2 - Processing parameters  
 SI 32768  
 SF 75.4677540 MHz  
 WDW EM  
 SSB 0  
 LB 1.00 Hz  
 GB 0  
 PC 1.00

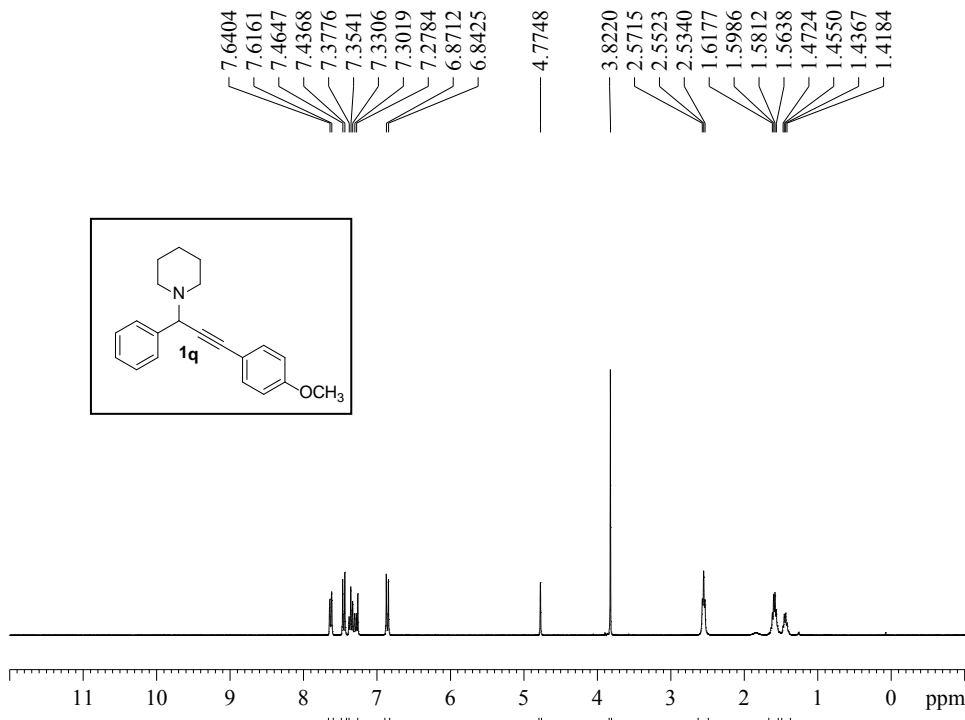

Current Data Parameters  
 NAME SNA 367 proton  
 EXPNO 1  
 PROCNO 1

F2 - Acquisition Parameters  
 Date 20130322  
 Time 19.39  
 INSTRUM spect  
 PROBHD 5 mm Multinucl  
 PULPROG zg30  
 TD 32768  
 SOLVENT CDCl3  
 NS 15  
 DS 0  
 SWH 496.403 Hz  
 FIDRES 0.137219 Hz  
 AQ 3.6438515 sec  
 RG 574.7  
 DW 111.200 usec  
 DE 6.50 usec  
 TE 298.2 K  
 D1 1.50000000 sec  
 MCREST 0.00000000 sec  
 MCWRK 0.01500000 sec

===== CHANNEL f1 =====  
 NUC1 1H  
 P1 10.60 usec  
 PL1 0.00 dB  
 SFO1 300.1319508 MHz

F2 - Processing parameters  
 SI 16384  
 SF 300.1300063 MHz  
 WDW EM  
 SSB 0  
 LB 0.10 Hz  
 GB 0  
 PC 1.00

1D NMR plot parameters  
 CX 20.00 cm  
 CY 0.00 cm  
 FIP 13.970 ppm  
 F1 4192.77 Hz  
 F2P -1.012 ppm  
 F2 -303.63 Hz  
 PPMCM 0.74908 ppm/cm  
 HZCM 224.82013 Hz/cm

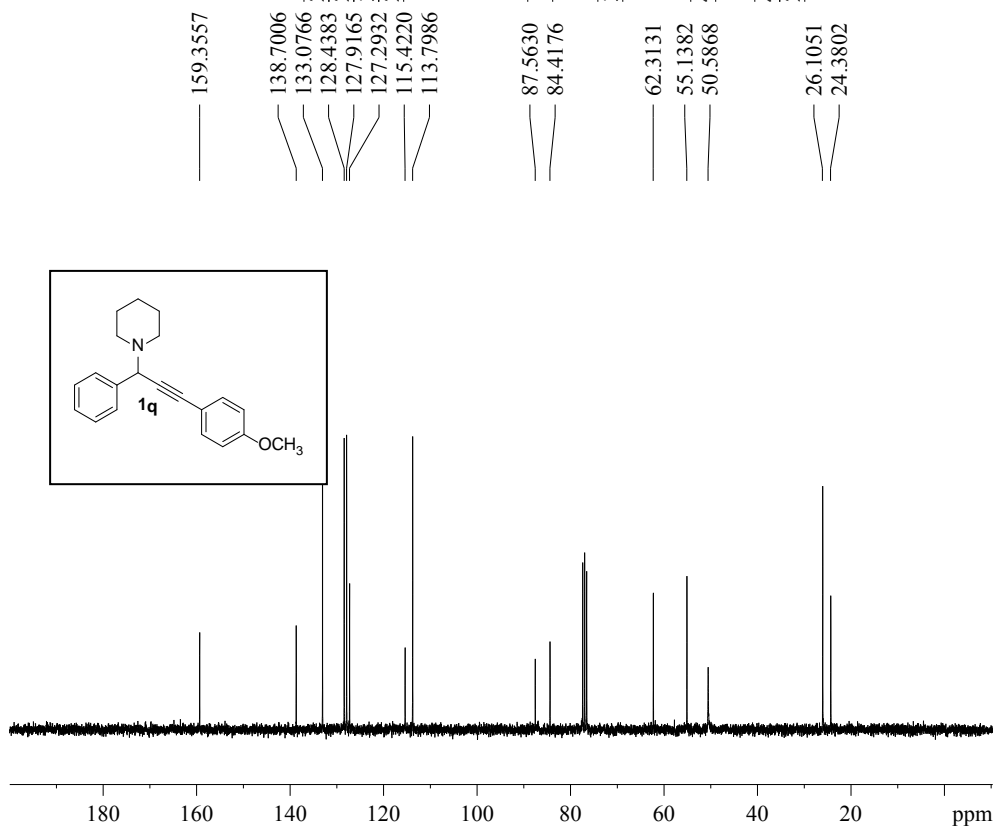

Current Data Parameters  
 NAME SNA 367 13C  
 EXPNO 1  
 PROCNO 1

F2 - Acquisition Parameters  
 Date 20130512  
 Time 20.35  
 INSTRUM spect  
 PROBHD 5 mm Multinucl  
 PULPROG zgpg30  
 TD 65536  
 SOLVENT CDCl3  
 NS 256  
 DS 0  
 SWH 18832.393 Hz  
 FIDRES 0.287360 Hz  
 AQ 1.7400308 sec  
 RG 20642.5  
 DW 26.550 usec  
 DE 6.50 usec  
 TE 300.2 K  
 D1 1.50000000 sec  
 d11 0.03000000 sec  
 DELTA 1.39999998 sec  
 MCREST 0.00000000 sec  
 MCWRK 0.01500000 sec

===== CHANNEL f1 =====  
 NUC1 13C  
 P1 11.10 usec  
 PL1 0.00 dB  
 SFO1 75.4763978 MHz

===== CHANNEL f2 =====  
 CPDPRG2 waltz16  
 NUC2 1H  
 PCPD2 90.00 usec  
 PL2 0.00 dB  
 PL12 18.80 dB  
 PL13 21.80 dB  
 SFO2 300.1313506 MHz

F2 - Processing parameters  
 SI 32768  
 SF 75.4677523 MHz  
 WDW EM  
 SSB 0  
 LB 1.00 Hz  
 GB 0  
 PC 1.00

1D NMR plot parameters  
 CX 20.00 cm  
 CY 12.50 cm  
 FIP 239.330 ppm  
 F1 18061.73 Hz  
 F2P -10.212 ppm  
 F2 -770.67 Hz  
 PPMCM 12.47711 ppm/cm  
 HZCM 941.61957 Hz/cm



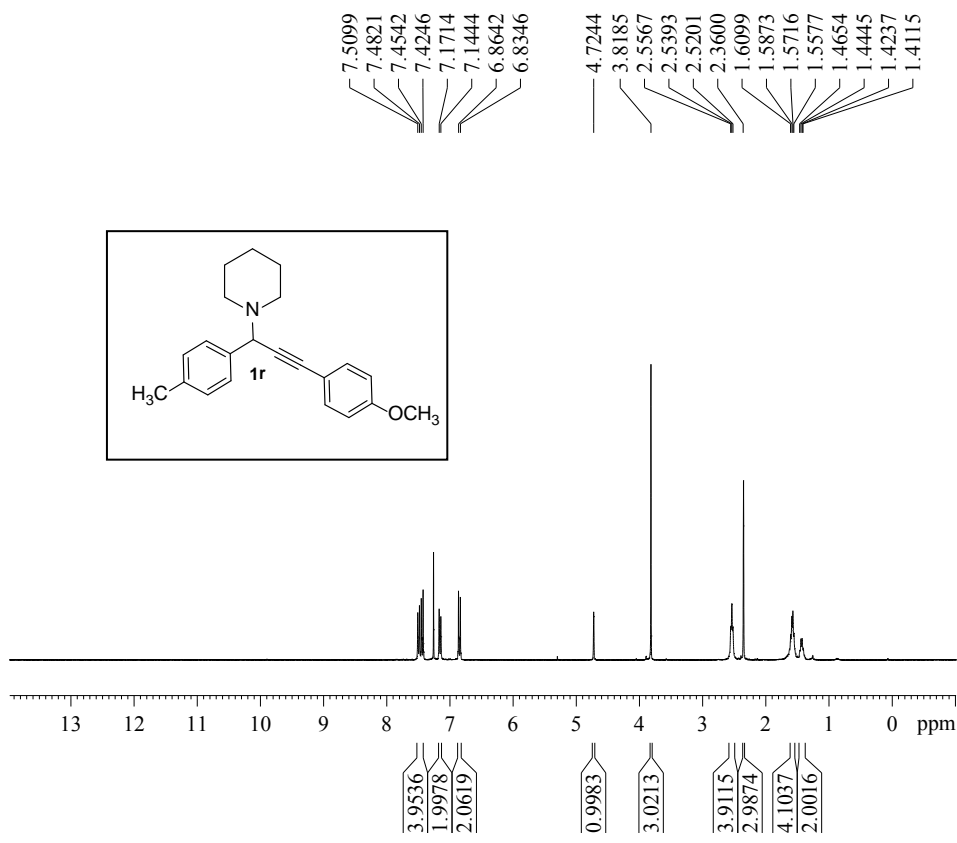

Current Data Parameters  
 NAME SNA 384 proton  
 EXPNO 1  
 PROCNO 1

F2 - Acquisition Parameters  
 Date\_ 20130403  
 Time 14.58  
 INSTRUM spect  
 PROBHD 5 mm Multinucl  
 PULPROG zg30  
 TD 32768  
 SOLVENT CDCl3  
 NS 20  
 DS 0  
 SWH 4496.403 Hz  
 FIDRES 0.137219 Hz  
 AQ 3.6438515 sec  
 RG 1024  
 DW 111.200 usec  
 DE 6.50 usec  
 TE 297.2 K  
 D1 1.50000000 sec  
 MCREST 0.00000000 sec  
 MCWRK 0.01500000 sec

==== CHANNEL f1 =====  
 NUC1 <sup>1</sup>H  
 P1 10.60 usec  
 PL1 0.00 dB  
 SFO1 300.1319508 MHz

F2 - Processing parameters  
 SI 16384  
 SF 300.1300065 MHz  
 WDW EM  
 SSB 0  
 LB 0.10 Hz  
 GB 0  
 PC 1.00

1D NMR plot parameters  
 CX 20.00 cm  
 CY 0.00 cm  
 FIP 13.969 ppm  
 F1 4192.50 Hz  
 F2P -1.013 ppm  
 F2 -303.90 Hz  
 PPMCM 0.74908 ppm/cm  
 HZCM 224.82013 Hz/cm

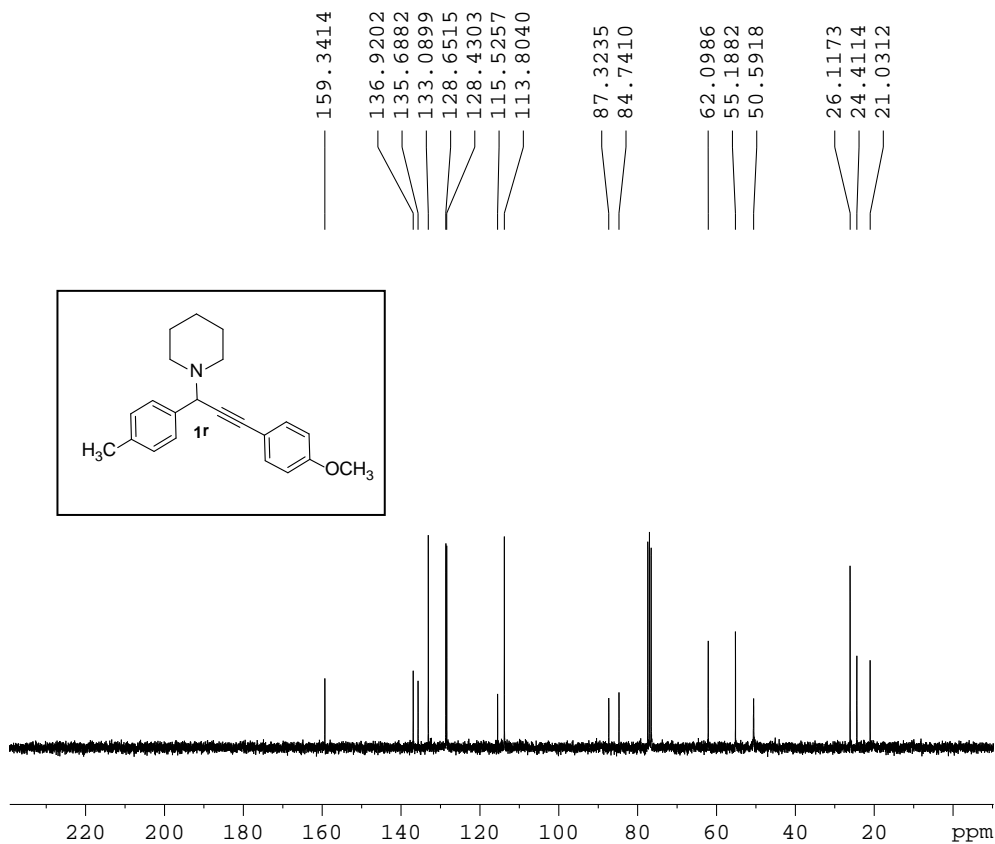

Current Data Parameters  
 NAME SNA 384 AT 13C  
 EXPNO 1  
 PROCNO 1

F2 - Acquisition Parameters  
 Date\_ 20130512  
 Time 19.23  
 INSTRUM spect  
 PROBHD 5 mm Multinucl  
 PULPROG zgpg30  
 TD 65536  
 SOLVENT CDCl3  
 NS 300  
 DS 0  
 SWH 18832.393 Hz  
 FIDRES 0.287360 Hz  
 AQ 1.7400308 sec  
 RG 14596.5  
 DW 26.550 usec  
 DE 6.50 usec  
 TE 300.2 K  
 D1 1.50000000 sec  
 d11 0.03000000 sec  
 DELTA 1.39999998 sec  
 MCREST 0.00000000 sec  
 MCWRK 0.01500000 sec

==== CHANNEL f1 =====  
 NUC1 <sup>13</sup>C  
 P1 11.10 usec  
 PL1 0.00 dB  
 SFO1 75.4763978 MHz

==== CHANNEL f2 =====  
 CPDPRG2 waltz16  
 NUC2 <sup>1</sup>H  
 PCPD2 90.00 usec  
 PL2 0.00 dB  
 PL12 18.80 dB  
 PL13 21.80 dB  
 SFO2 300.1313506 MHz

F2 - Processing parameters  
 SI 32768  
 SF 75.4677551 MHz  
 WDW EM  
 SSB 0  
 LB 1.00 Hz  
 GB 0  
 PC 1.00

1D NMR plot parameters  
 CX 20.00 cm  
 CY 12.50 cm  
 FIP 239.292 ppm  
 F1 18058.85 Hz  
 F2P -10.250 ppm  
 F2 -773.54 Hz  
 PPMCM 12.47711 ppm/cm  
 HZCM 941.61957 Hz/cm

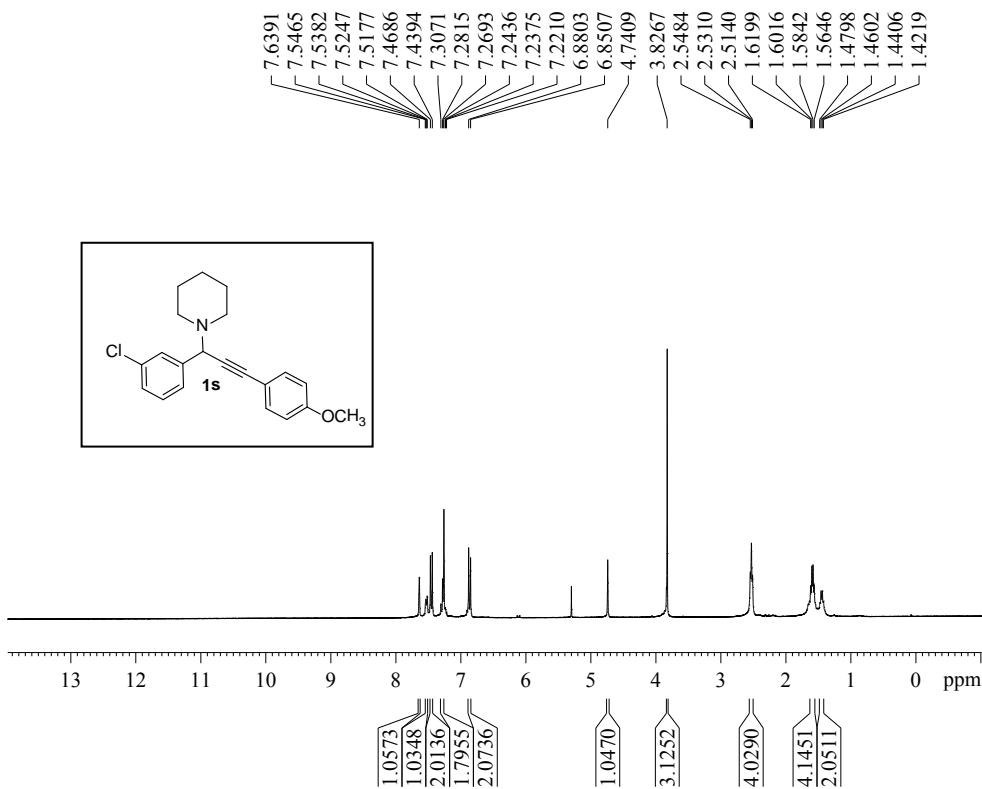

Current Data Parameters  
 NAME SNA 385 proton  
 EXPNO 1  
 PROCNO 1

F2 - Acquisition Parameters  
 Date\_ 20130403  
 Time 14.45  
 INSTRUM spect  
 PROBHD 5 mm Multinucl  
 PULPROG zg30  
 TD 32768  
 SOLVENT CDCl3  
 NS 20  
 DS 0  
 SWH 4496.403 Hz  
 FIDRES 0.137219 Hz  
 AQ 3.6438515 sec  
 RG 645.1  
 DW 111.200 usec  
 DE 6.50 usec  
 TE 297.2 K  
 D1 1.5000000 sec  
 MCREST 0.0000000 sec  
 MCWRK 0.0150000 sec

===== CHANNEL f1 =====  
 NUC1 1H  
 P1 10.60 usec  
 PL1 0.00 dB  
 SFO1 300.1319508 MHz

F2 - Processing parameters  
 SI 16384  
 SF 300.1300063 MHz  
 WDW EM  
 SSB 0  
 LB 0.10 Hz  
 GB 0  
 PC 1.00

1D NMR plot parameters  
 CX 20.00 cm  
 CY 0.00 cm  
 F1P 13.970 ppm  
 F1 4192.77 Hz  
 F2P -1.012 ppm  
 F2 -303.63 Hz  
 PPMCM 0.74908 ppm/cm  
 HZCM 224.82013 Hz/cm

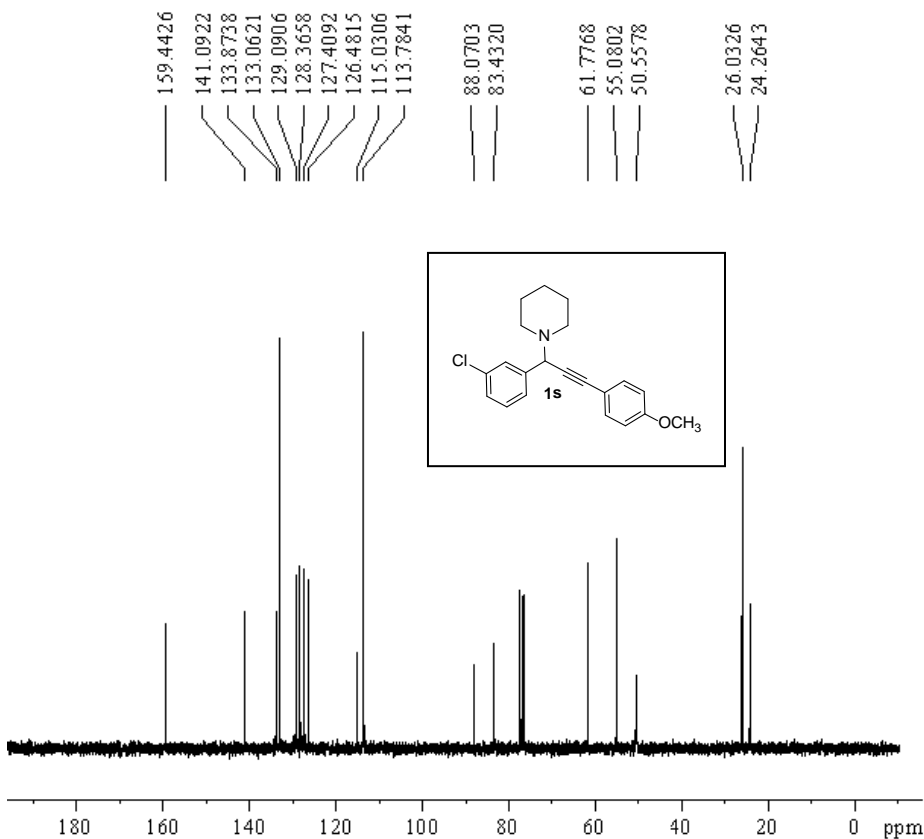

Current Data Parameters  
 NAME SNA 385 13C c  
 EXPNO 1  
 PROCNO 1

F2 - Acquisition Parameters  
 Date\_ 20130512  
 Time 19.55  
 INSTRUM spect  
 PROBHD 5 mm Multinucl  
 PULPROG zgpg30  
 ID 65536  
 SOLVENT CDCl3  
 NS 256  
 DS 0  
 SWH 18832.393 Hz  
 FIDRES 0.287360 Hz  
 AQ 1.7400308 sec  
 RG 5792.6  
 DW 26.550 usec  
 DE 6.50 usec  
 TE 300.2 K  
 D1 1.5000000 sec  
 d11 0.0300000 sec  
 DELTA 1.3999998 sec  
 MCREST 0.0000000 sec  
 MCWRK 0.0150000 sec

===== CHANNEL f1 ====  
 NUC1 13C  
 P1 11.10 usec  
 PL1 0.00 dB  
 SFO1 75.4763978 MHz

===== CHANNEL f2 ====  
 CPDPRG2 waltz16  
 NUC2 1H  
 PCPD2 90.00 usec  
 PL2 0.00 dB  
 PL12 18.80 dB  
 PL13 21.80 dB  
 SFO2 300.1313506 MHz

F2 - Processing parameters  
 SI 32768  
 SF 75.4677523 MHz  
 WDW EM  
 SSB 0  
 LB 1.00 Hz  
 GB 0  
 PC 1.00

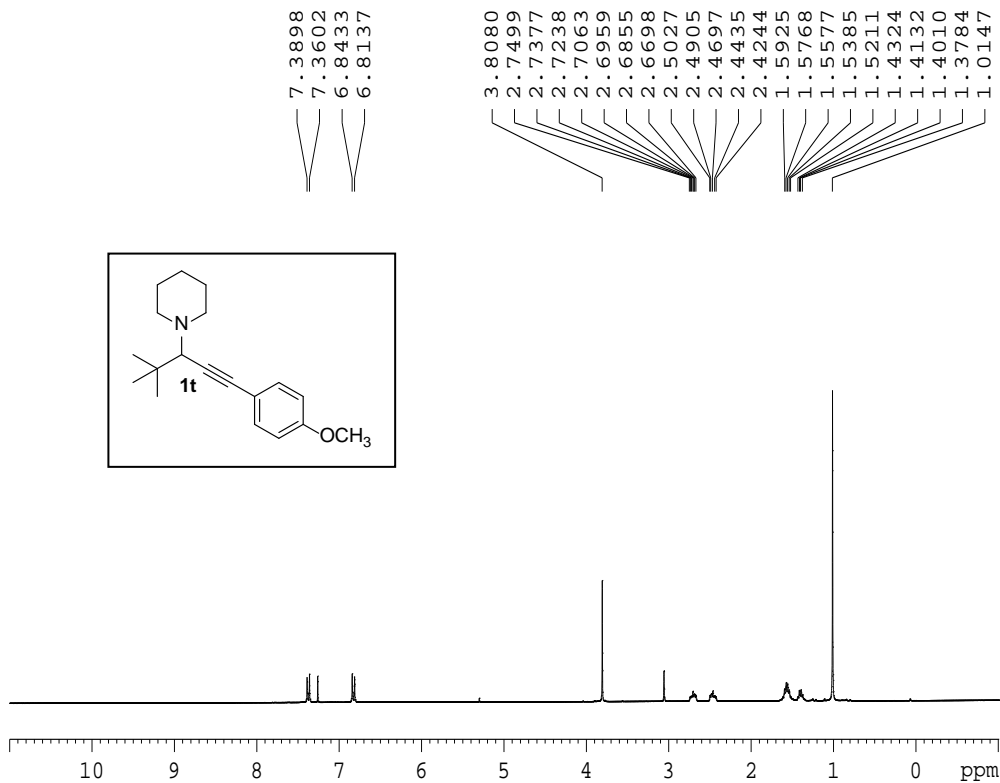

Current Data Parameters  
 NAME SNA 387 proton  
 EXPNO 1  
 PROCNO 1

F2 - Acquisition Parameters  
 Date\_ 20130403  
 Time 14.37  
 INSTRUM spect  
 PROBHD 5 mm Multinucl  
 PULPROG zg30  
 TD 32768  
 SOLVENT CDCl3  
 NS 20  
 DS 0  
 SWH 4496.403 Hz  
 FIDRES 0.137219 Hz  
 AQ 3.6438515 sec  
 RG 724.1  
 DW 111.200 usec  
 DE 6.50 usec  
 TE 297.2 K  
 DL 1.5000000 sec  
 MCREST 0.0000000 sec  
 MCWRK 0.0150000 sec

===== CHANNEL f1 =====  
 NUC1 1H  
 P1 10.60 usec  
 PL1 0.00 dB  
 SFO1 300.1319508 MHz

F2 - Processing parameters  
 SI 16384  
 SF 300.1300062 MHz  
 WDW EM  
 SSB 0  
 LB 0.10 Hz  
 GB 0  
 PC 1.00

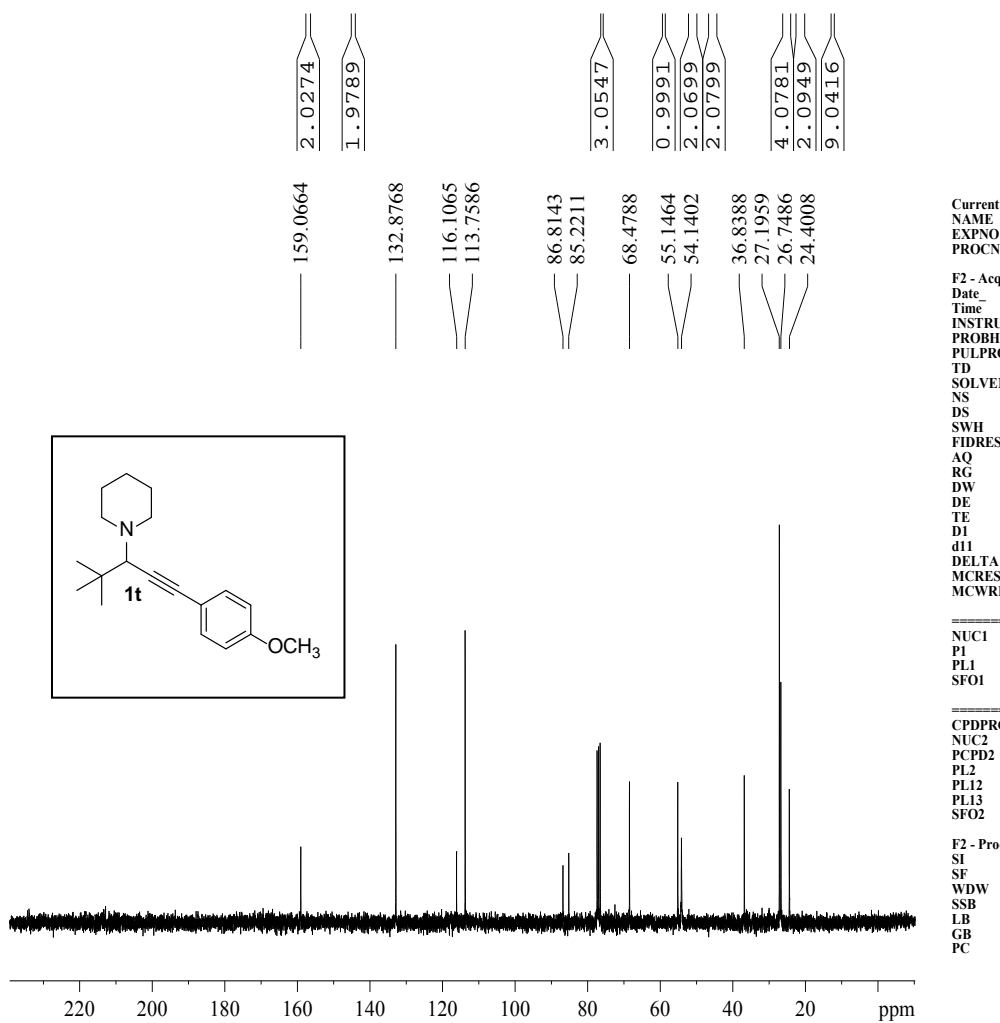

Current Data Parameters  
 NAME (CH3)3CCH2Phacetylene  
 EXPNO 130804  
 PROCNO 1

F2 - Acquisition Parameters  
 Date\_ 20130804  
 Time 17.36  
 INSTRUM spect  
 PROBHD 5 mm Multinucl  
 PULPROG zgpg30  
 TD 65536  
 SOLVENT CDCl3  
 NS 250  
 DS 0  
 SWH 18832.393 Hz  
 FIDRES 0.287360 Hz  
 AQ 1.7400308 sec  
 RG 18390.4  
 DW 26.550 usec  
 DE 6.50 usec  
 TE 302.2 K  
 D1 1.5000000 sec  
 d11 0.0300000 sec  
 DELTA 1.39999998 sec  
 MCREST 0.0000000 sec  
 MCWRK 0.0150000 sec

===== CHANNEL f1 =====  
 NUC1 13C  
 P1 11.10 usec  
 PL1 0.00 dB  
 SFO1 75.4763978 MHz

===== CHANNEL f2 =====  
 CPDPRG2 waltz16  
 NUC2 1H  
 PCPD2 90.00 usec  
 PL2 0.00 dB  
 PL12 18.80 dB  
 PL13 21.80 dB  
 SFO2 300.1313506 MHz

F2 - Processing parameters  
 SI 32768  
 SF 75.4677540 MHz  
 WDW EM  
 SSB 0  
 LB 1.00 Hz  
 GB 0  
 PC 1.00

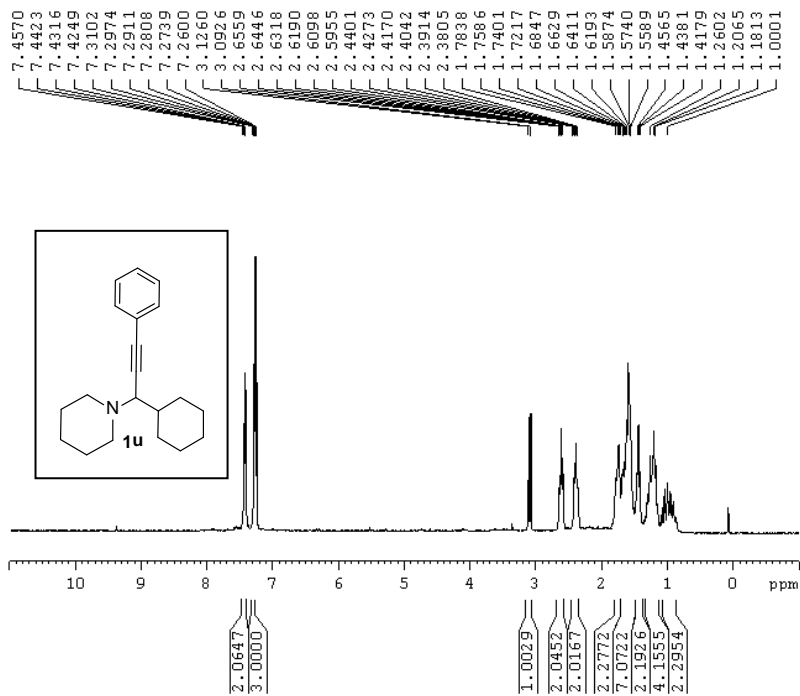

Current Data Parameters  
NAME SNA.339 H  
EXPNO 2  
PROCNO 1

F2 - Acquisition Parameters  
Date\_ 20130321  
Time 1418  
INSTRUM spect  
PROBHD 5 mm Multinuc  
PULPROG zg30  
TD 32768  
SOLVENT CDCl3  
NS 20  
DS 0  
SWH 4406.403 Hz  
FIDRES 0.127219 Hz  
AQ 3.6438515 sec  
RG 456.1  
DW 111.200 usec  
DE 6.50 usec  
TE 299.2 K  
D1 1.5000000 sec  
MCREST 0.0000000 sec  
MCWRK 0.0150000 sec

----- CHANNEL f1 -----  
NUC1 1H  
P1 10.60 usec  
PL1 0.00 dB  
SFO1 300.1319506 MHz

F2 - Processing parameters  
SI 16384  
SF 300.1300065 MHz  
WDW EM  
SSB 0  
LB 0.10 Hz  
GB 0  
PC 1.00

1D NMR plot parameters  
CX 20.00 cm  
CY 0.00 cm  
FIP 13.969 ppm  
FI 4192.50 Hz  
FZF -1.013 ppm  
FZ 303.90 Hz  
FZCM 0.74068 ppm/cm  
HZCM 224.82013 Hz/cm

131.6996  
128.1629  
127.5831  
123.8145

87.6935  
86.1570

64.4728

50.7897

39.6577

31.2797

30.6130

26.7864

26.2046

26.0906

24.5832

Current Data Parameters  
NAME SNA cycloaldehyde 13C  
EXPNO 2  
PROCNO 1

F2 - Acquisition Parameters  
Date 20130511  
Time 2.11  
INSTRUM spect  
PROBHD 5 mm Multinuc  
PULPROG zgpg30  
TD 65536  
SOLVENT CDCl3  
NS 1000  
DS 0  
SWH 18832.393 Hz  
FIDRES 0.287360 Hz  
AQ 1.7400308 sec  
RG 5792.6  
DW 26.550 usec  
DE 6.50 usec  
TE 299.2 K  
D1 1.5000000 sec  
d11 0.0300000 sec  
DELTA 1.3999998 sec  
MCREST 0.0000000 sec  
MCWRK 0.0150000 sec

===== CHANNEL f1 =====  
NUC1 13C  
P1 11.10 usec  
PL1 0.00 dB  
SFO1 75.4763978 MHz

===== CHANNEL f2 =====  
CPDPRG2 waltz16  
NUC2 1H  
PCPD2 90.00 usec  
PL2 0.00 dB  
PL12 18.80 dB  
PL13 21.80 dB  
SFO2 300.1313506 MHz

F2 - Processing parameters  
SI 32768  
SF 75.4677517 MHz  
WDW EM  
SSB 0  
LB 1.00 Hz  
GB 0  
PC 1.00

1D NMR plot parameters  
CX 20.00 cm  
CY 12.50 cm  
FIP 239.338 ppm  
FI 18062.30 Hz  
FZF 10.204 ppm  
FZ -770.09 Hz  
FZCM 12.47711 ppm/cm  
HZCM 941.61957 Hz/cm

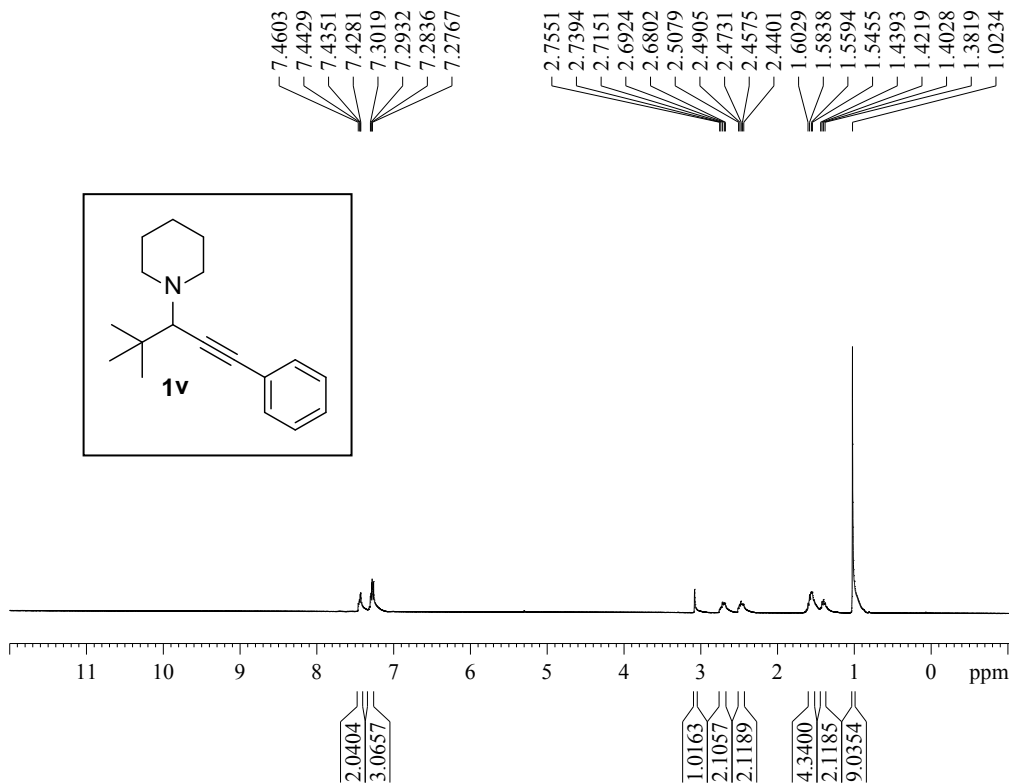

Current Data Parameters  
 NAME SNA 382.1 proton  
 EXPNO 1  
 PROCNO 1

F2 - Acquisition Parameters  
 Date\_ 20130326  
 Time 21.46  
 INSTRUM spect  
 PROBHD 5 mm Multinucl  
 PULPROG zg30  
 TD 32768  
 SOLVENT CDCl3  
 NS 20  
 DS 0  
 SWH 4496.403 Hz  
 FIDRES 0.137219 Hz  
 AQ 3.6438515 sec  
 RG 645.1  
 DW 111.200 usec  
 DE 6.50 usec  
 TE 297.2 K  
 D1 1.50000000 sec  
 MCREST 0.00000000 sec  
 MCWRK 0.01500000 sec

===== CHANNEL f1 =====  
 NUC1 1H  
 P1 10.60 usec  
 PL1 0.00 dB  
 SFO1 300.1319508 MHz

F2 - Processing parameters  
 SI 16384  
 SF 300.1300071 MHz  
 WDW EM  
 SSB 0  
 LB 0.10 Hz  
 GB 0  
 PC 1.00

ID NMR plot parameters  
 CX 20.00 cm  
 CY 0.00 cm  
 FIP 13.967 ppm  
 F1 4191.95 Hz  
 F2P -1.014 ppm  
 F2 -304.45 Hz  
 PPMCM 0.74908 ppm/cm  
 HZCM 224.82013 Hz/cm

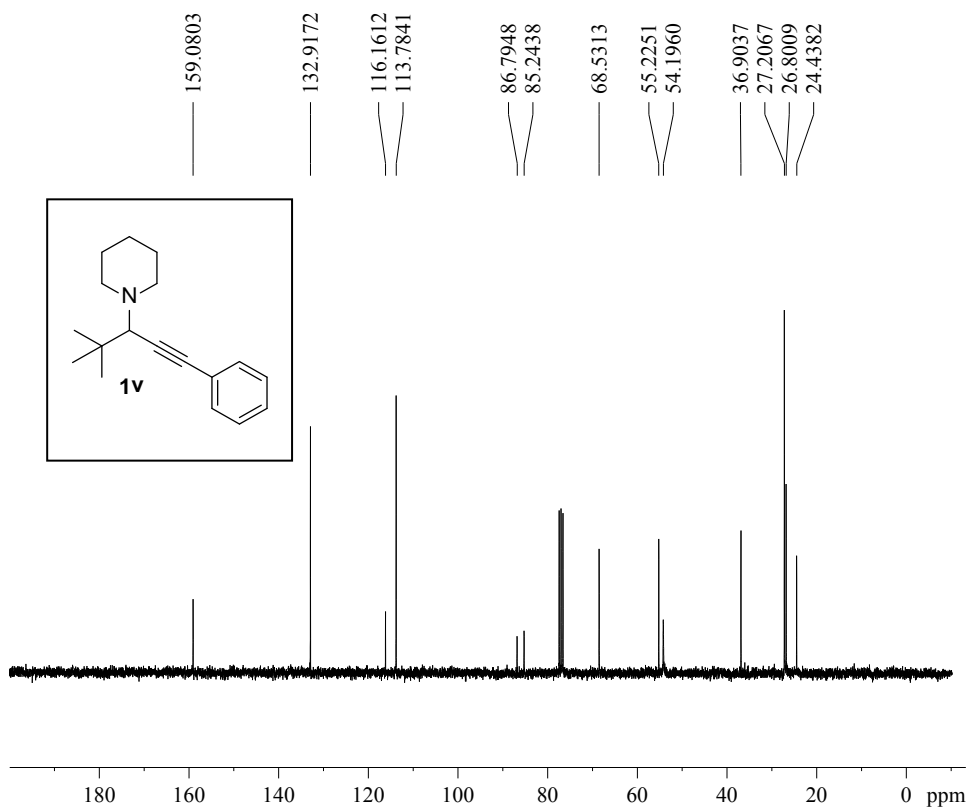

Current Data Parameters  
 NAME SNA 385 13C d  
 EXPNO 1  
 PROCNO 1

F2 - Acquisition Parameters  
 Date\_ 20130512  
 Time 20.13  
 INSTRUM spect  
 PROBHD 5 mm Multinucl  
 PULPROG zgpg30  
 TD 65536  
 SOLVENT CDCl3  
 NS 256  
 DS 0  
 SWH 18832.393 Hz  
 FIDRES 0.287360 Hz  
 AQ 1.7400308 sec  
 RG 5792.6  
 DW 26.550 usec  
 DE 6.50 usec  
 TE 300.2 K  
 D1 1.50000000 sec  
 d11 0.03000000 sec  
 DELTA 1.39999998 sec  
 MCREST 0.00000000 sec  
 MCWRK 0.01500000 sec

===== CHANNEL f1 =====  
 NUC1 13C  
 P1 11.10 usec  
 PL1 0.00 dB  
 SFO1 75.4763978 MHz

===== CHANNEL f2 =====  
 CPDPRG2 waltz16  
 NUC2 1H  
 PCPD2 90.00 usec  
 PL2 0.00 dB  
 PL12 18.80 dB  
 PL13 21.80 dB  
 SFO2 300.1313506 MHz

F2 - Processing parameters  
 SI 32768  
 SF 75.4677528 MHz  
 WDW EM  
 SSB 0  
 LB 1.00 Hz  
 GB 0  
 PC 1.00

ID NMR plot parameters  
 CX 20.00 cm  
 CY 12.50 cm  
 FIP 239.323 ppm  
 F1 18061.15 Hz  
 F2 -771.24 Hz  
 PPMCM 12.47711 ppm/cm  
 HZCM 941.61951 Hz/cm

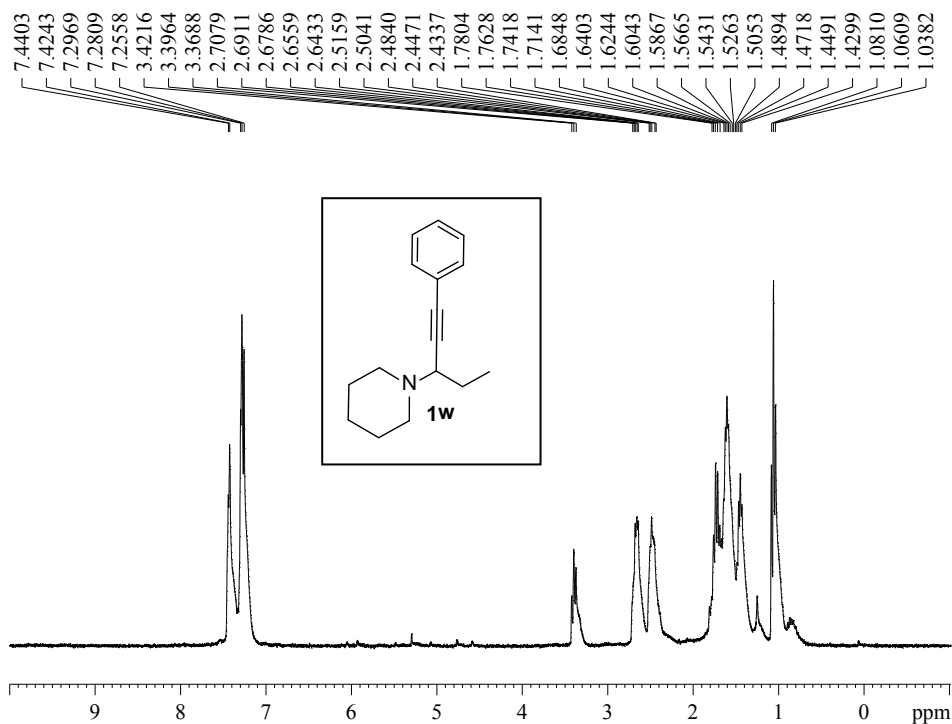

Current Data Parameters  
 NAME SNA 375 proton  
 EXPNO 1  
 PROCNO 1

F2 - Acquisition Parameters  
 Date\_ 20130326  
 Time 15.50  
 INSTRUM spect  
 PROBHD 5 mm Multinucl  
 PULPROG zg30  
 TD 32768  
 SOLVENT CDCl3  
 NS 20  
 DS 0  
 SWH 4496.403 Hz  
 FIDRES 0.137219 Hz  
 AQ 3.6438515 sec  
 RG 724.1  
 DW 111.200 usec  
 DE 6.50 usec  
 TE 297.2 K  
 DI 1.5000000 sec  
 MCREST 0.0000000 sec  
 MCWRK 0.01500000 sec

===== CHANNEL f1 =====  
 NUC1 1H  
 P1 10.60 usec  
 PL1 0.00 dB  
 SFO1 300.1319508 MHz

F2 - Processing parameters  
 SI 16384  
 SF 300.1300082 MHz  
 WDW EM  
 SSB 0  
 LB 0.10 Hz  
 GB 0  
 PC 1.00

1D NMR plot parameters  
 CX 20.00 cm  
 CY 0.00 cm  
 FIP 13.963 ppm  
 F1 4190.85 Hz  
 F2P -1.018 ppm  
 F2 -305.55 Hz  
 PPMCM 0.74908 ppm/cm  
 HZCM 224.82013 Hz/cm

2.0041  
3.0578

1.0128  
2.1605  
2.3652

2.5388  
4.4301  
2.3038  
3.0913

131.6435  
128.1212  
127.7299  
123.5717

87.8112  
85.7566

60.3182  
50.5343

26.5146  
26.0743  
24.5578  
11.4473

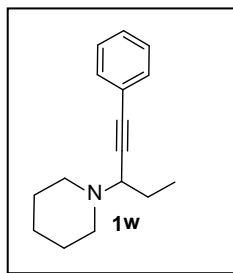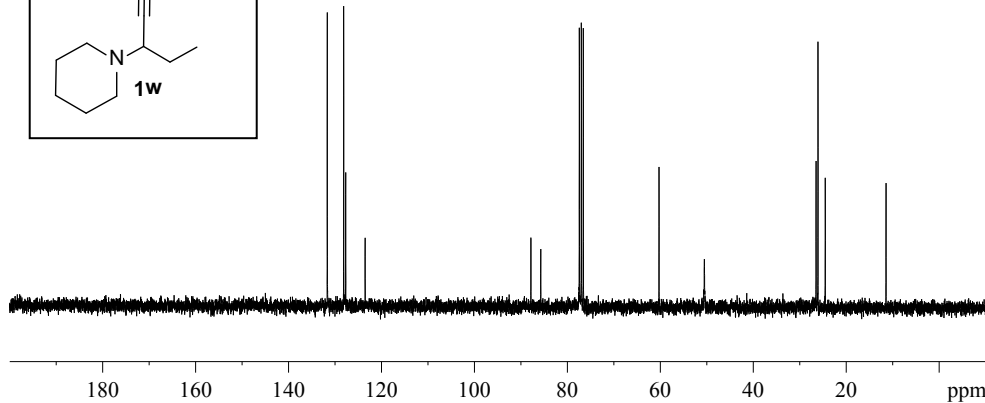

Current Data Parameters  
 NAME SNA propanal 13C  
 EXPNO 1  
 PROCNO 1

F2 - Acquisition Parameters  
 Date\_ 20130518  
 Time 16.37  
 INSTRUM spect  
 PROBHD 5 mm Multinucl  
 PULPROG zgpg30  
 TD 65536  
 SOLVENT CDCl3  
 NS 256  
 DS 0  
 SWH 18832.393 Hz  
 FIDRES 0.287360 Hz  
 AQ 1.7400308 sec  
 RG 16384  
 DW 26.550 usec  
 DE 6.50 usec  
 TE 301.2 K  
 DI 1.5000000 sec  
 dI1 0.0300000 sec  
 DELTA 1.39999998 sec  
 MCREST 0.0000000 sec  
 MCWRK 0.01500000 sec

===== CHANNEL f1 =====  
 NUC1 13C  
 P1 11.10 usec  
 PL1 0.00 dB  
 SFO1 75.4763978 MHz

===== CHANNEL f2 =====  
 CPDPRG2 waltz16  
 NUC2 1H  
 PCPD2 90.00 usec  
 PL2 0.00 dB  
 PL12 18.80 dB  
 PL13 21.80 dB  
 SFO2 300.1313506 MHz

F2 - Processing parameters  
 SI 32768  
 SF 75.4677540 MHz  
 WDW EM  
 SSB 0  
 LB 1.00 Hz  
 GB 0  
 PC 1.00

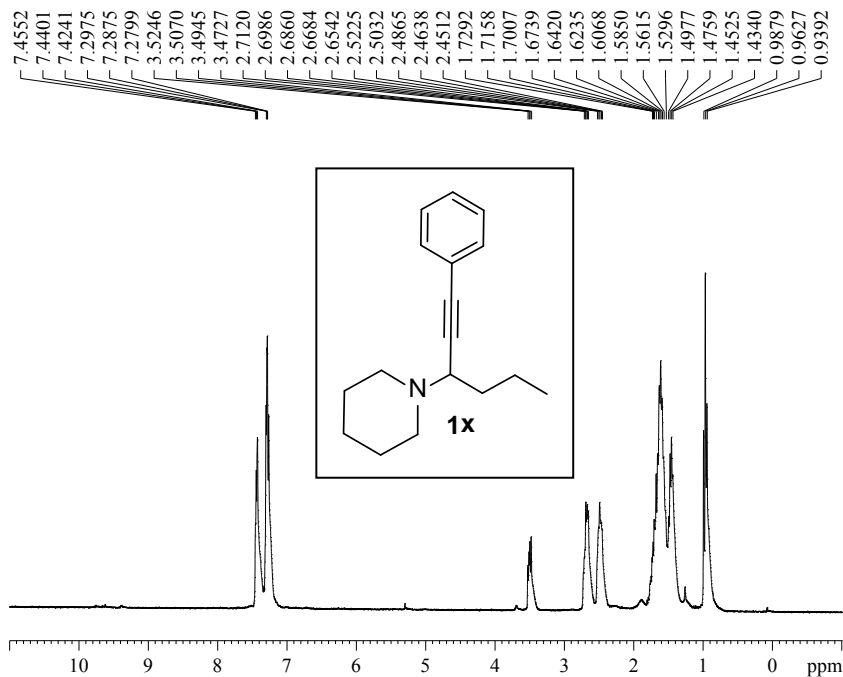

Current Data Parameters  
NAME SNA 377  
EXPNO 1  
PROCNO 1

F2 - Acquisition Parameters  
Date\_ 20130326  
Time 15:34  
INSTRUM spect  
PROBHD 5 mm Multinucl  
PULPROG zg30  
TD 32768  
SOLVENT CDCl3  
NS 20  
DS 0  
SWH 4496.403 Hz  
FIDRES 0.137219 Hz  
AQ 3.6438515 sec  
RG 456.1  
DW 111.200 usec  
DE 6.50 usec  
TE 297.2 K  
D1 1.50000000 sec  
MCREST 0.00000000 sec  
MCWRK 0.01500000 sec

===== CHANNEL f1 =====  
NUC1 1H  
P1 10.60 usec  
PL1 0.00 dB  
SFO1 300.1319508 MHz

F2 - Processing parameters  
SI 16384  
SF 300.1300054 MHz  
WDW EM  
SSB 0  
LB 0.10 Hz  
GB 0  
PC 1.00

1D NMR plot parameters  
CX 20.00 cm  
CY 0.00 cm  
F1P 13.973 ppm  
F1 4193.60 Hz  
F2P -1.009 ppm  
F2 -302.80 Hz  
PPMCM 0.74908 ppm/cm  
HZCM 224.82013 Hz/cm

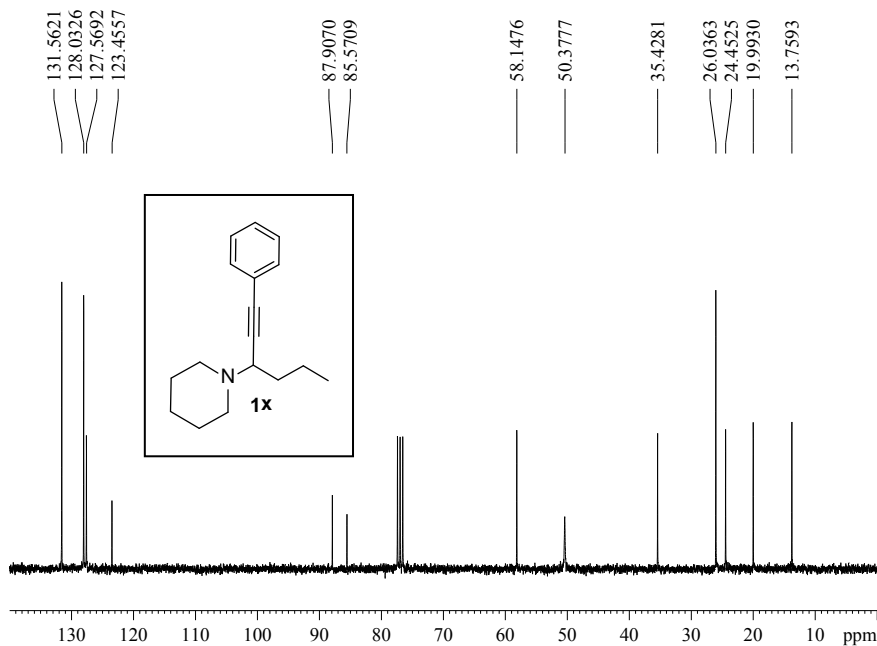

Current Data Parameters  
NAME SNA butanal 13C 13C  
EXPNO 1  
PROCNO 1

F2 - Acquisition Parameters  
Date\_ 20130518  
Time 16:18  
INSTRUM spect  
PROBHD 5 mm Multinucl  
PULPROG zgpg30  
TD 65536  
SOLVENT CDCl3  
NS 256  
DS 0  
SWH 18832.293 Hz  
FIDRES 0.287360 Hz  
AQ 1.7400308 sec  
RG 5792.6  
DW 26.550 usec  
DE 6.50 usec  
TE 301.2 K  
D1 1.50000000 sec  
d11 0.03000000 sec  
DELTA 1.39999998 sec  
MCREST 0.00000000 sec  
MCWRK 0.01500000 sec

===== CHANNEL f1 =====  
NUC1 13C  
P1 11.10 usec  
PL1 0.00 dB  
SFO1 75.4763978 MHz

===== CHANNEL f2 =====  
CPDPRG2 waltz16  
NUC2 1H  
PCPD2 90.00 usec  
PL2 0.00 dB  
PL12 18.80 dB  
PL13 21.80 dB  
SFO2 300.1313506 MHz

F2 - Processing parameters  
SI 32768  
SF 75.4677517 MHz  
WDW EM  
SSB 0  
LB 1.00 Hz  
GB 0  
PC 1.00

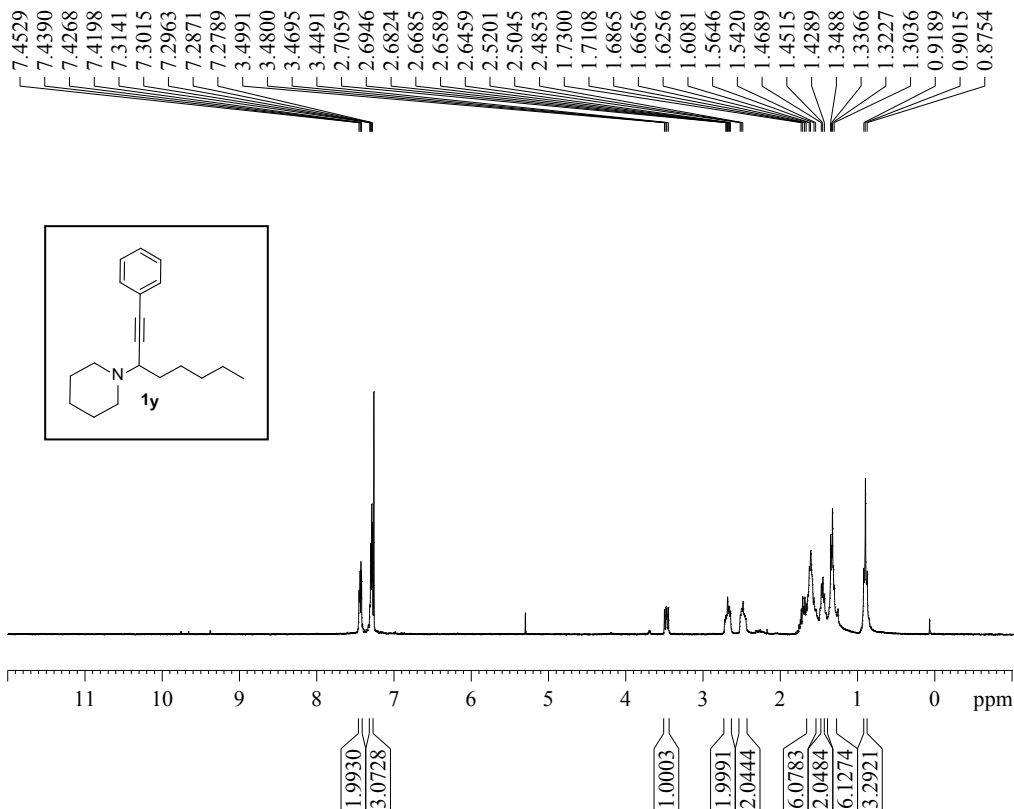

Current Data Parameters  
 NAME SNA 374 proton  
 EXPNO 3  
 PROCNO 1

F2 - Acquisition Parameters  
 Date\_ 20130321  
 Time 23.00  
 INSTRUM spect  
 PROBHD 5 mm Multinucl  
 PULPROG zg30  
 TD 32768  
 SOLVENT CDCl3  
 NS 20  
 DS 0  
 SWH 4496.403 Hz  
 FIDRES 0.137219 Hz  
 AQ 3.6438515 sec  
 RG 1024  
 DW 111.200 usec  
 DE 6.50 usec  
 TE 297.2 K  
 D1 1.50000000 sec  
 MCREST 0.00000000 sec  
 MCWRK 0.01500000 sec

===== CHANNEL f1 =====  
 NUC1 1H  
 P1 10.60 usec  
 PL1 0.00 dB  
 SFO1 300.1319508 MHz

F2 - Processing parameters  
 SI 16384  
 SF 300.1300065 MHz  
 WDW EM  
 SSB 0  
 LB 0.10 Hz  
 GB 0  
 PC 1.00

1D NMR plot parameters  
 CX 20.00 cm  
 CY 0.00 cm  
 FIP 13.969 ppm  
 F1 4192.50 Hz  
 F2P -1.013 ppm  
 F2 -303.90 Hz  
 PPMCM 0.74908 ppm/cm  
 HZCM 224.82013 Hz/cm

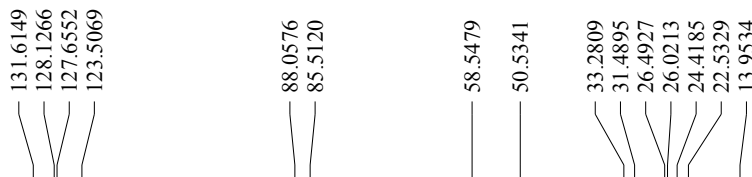

Current Data Parameters  
 NAME SNA hexanal 13C 13C  
 EXPNO 1  
 PROCNO 1

F2 - Acquisition Parameters  
 Date\_ 20130518  
 Time 15.58  
 INSTRUM spect  
 PROBHD 5 mm Multinucl  
 PULPROG zgpg30  
 TD 65536  
 SOLVENT CDCl3  
 NS 256  
 DS 0  
 SWH 18832.393 Hz  
 FIDRES 0.287360 Hz  
 AQ 1.7400308 sec  
 RG 5792.6  
 DW 26.550 usec  
 DE 6.50 usec  
 TE 301.2 K  
 D1 1.50000000 sec  
 d11 0.03000000 sec  
 DELTA 1.39999998 sec  
 MCREST 0.00000000 sec  
 MCWRK 0.01500000 sec

===== CHANNEL f1 =====  
 NUC1 13C  
 P1 11.10 usec  
 PL1 0.00 dB  
 SFO1 75.4763978 MHz

===== CHANNEL f2 =====  
 CPDPRG2 waltz16  
 NUC2 1H  
 PCPD2 90.00 usec  
 PL2 0.00 dB  
 PL12 18.80 dB  
 PL13 21.80 dB  
 SFO2 300.1313506 MHz

F2 - Processing parameters  
 SI 32768  
 SF 75.4677488 MHz  
 WDW EM  
 SSB 0  
 LB 1.00 Hz  
 GB 0  
 PC 1.00

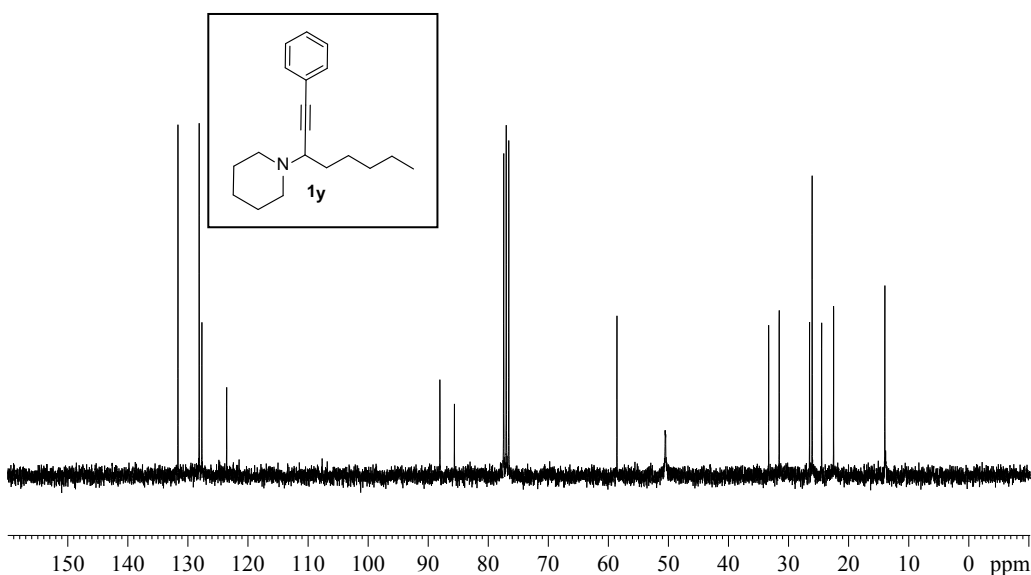



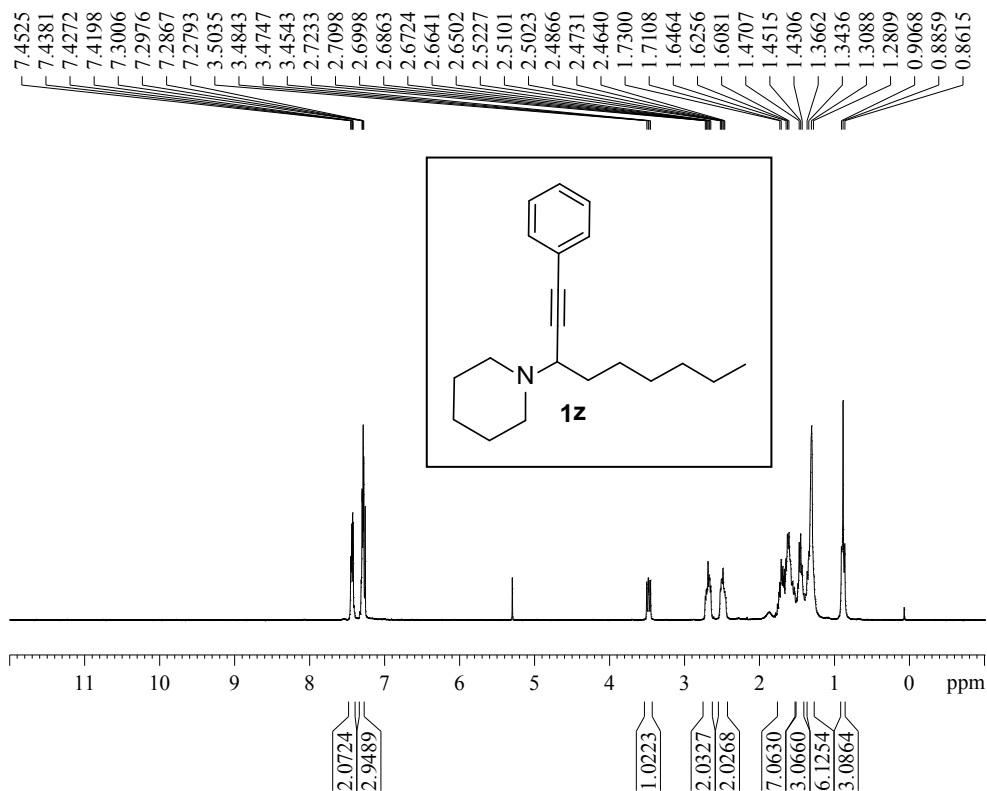

Current Data Parameters  
NAME SNA 371.1 proton  
EXPNO 1  
PROCNO 1

F2 - Acquisition Parameters  
Date\_ 20130320  
Time 15.54  
INSTRUM spect  
PROBHD 5 mm Multinucl  
PULPROG zg30  
TD 32768  
SOLVENT CDC13  
NS 8  
DS 0  
SWH 4496.403 Hz  
FIDRES 0.137219 Hz  
AQ 3.6438515 sec  
RG 512  
DW 111.200 usec  
DE 6.50 usec  
TE 298.2 K  
D1 1.50000000 sec  
MCREST 0.00000000 sec  
MCWRK 0.01500000 sec

===== CHANNEL f1 =====  
NUC1 1H  
P1 10.60 usec  
PL1 0.00 dB  
SFO1 300.1319508 MHz

F2 - Processing parameters  
SI 16384  
SF 300.1300074 MHz  
WDW EM  
SSB 0  
LB 0.10 Hz  
GB 0  
PC 1.00

1D NMR plot parameters  
CX 20.00 cm  
CY 0.00 cm  
FIP 13.966 ppm  
F1 4191.68 Hz  
F2P -4.015 ppm  
F2 -304.73 Hz  
PPMCM 0.74908 ppm/cm  
HZCM 224.82013 Hz/cm

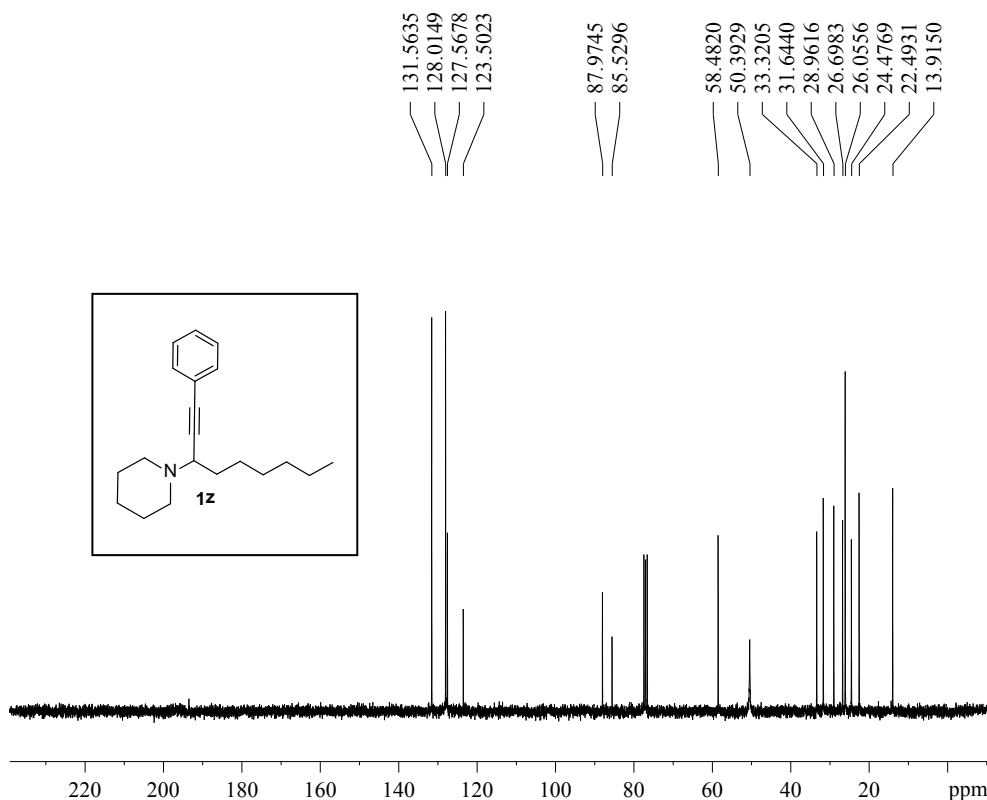

Current Data Parameters  
NAME SNA heptaldehyde 13C  
EXPNO 1  
PROCNO 1

F2 - Acquisition Parameters  
Date\_ 20130517  
Time 19.42  
INSTRUM spect  
PROBHD 5 mm Multinucl  
PULPROG zgpg30  
TD 65536  
SOLVENT CDC13  
NS 256  
DS 0  
SWH 18832.393 Hz  
FIDRES 0.287360 Hz  
AQ 1.7400308 sec  
RG 14596.5  
DW 26.550 usec  
DE 6.50 usec  
TE 301.2 K  
D1 1.50000000 sec  
d11 0.03000000 sec  
DELTA 1.39999998 sec  
MCREST 0.00000000 sec  
MCWRK 0.01500000 sec

===== CHANNEL f1 =====  
NUC1 13C  
P1 11.10 usec  
PL1 0.00 dB  
SFO1 75.4763978 MHz

===== CHANNEL f2 =====  
CPDPRG2 waltz16  
NUC2 1H  
PCPD2 90.00 usec  
PL2 0.00 dB  
PL12 18.80 dB  
PL13 21.80 dB  
SFO2 300.1313506 MHz

F2 - Processing parameters  
SI 32768  
SF 75.4677534 MHz  
WDW EM  
SSB 0  
LB 1.00 Hz  
GB 0  
PC 1.00

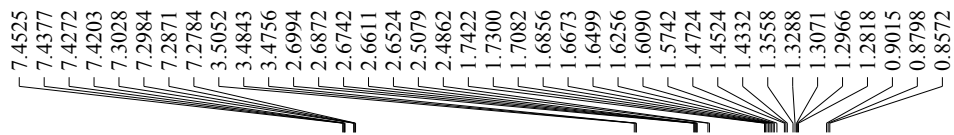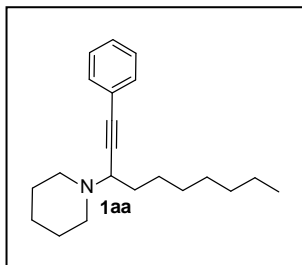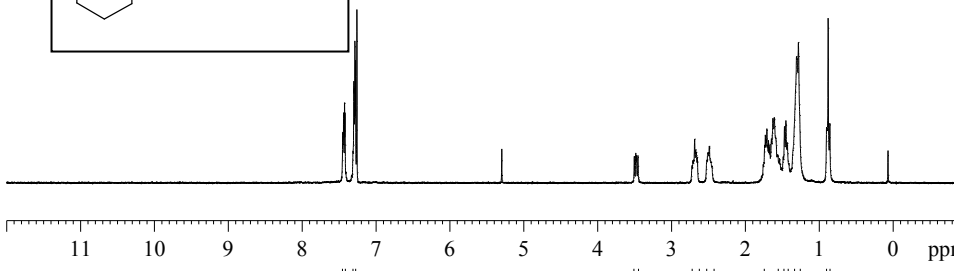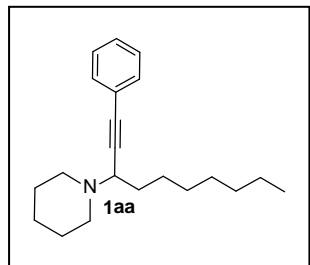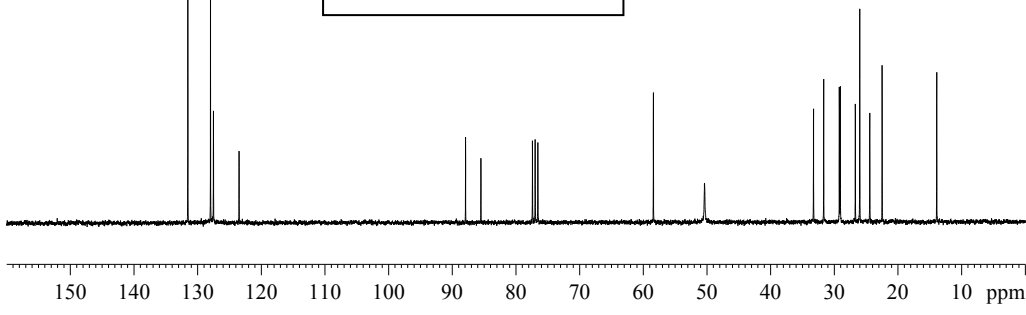

Current Data Parameters  
 NAME SNA 369 proton  
 EXPNO 1  
 PROCNO 1

F2 - Acquisition Parameters  
 Date\_ 20130320  
 Time 15.18  
 INSTRUM spect  
 PROBHD 5 mm Multinucl  
 PULPROG zg30  
 TD 32768  
 SOLVENT CDCl3  
 NS 8  
 DS 0  
 SWH 496.403 Hz  
 FIDRES 0.137219 Hz  
 AQ 3.6438515 sec  
 RG 812.7  
 DW 111.200 usec  
 DE 6.50 usec  
 TE 298.2 K  
 D1 1.50000000 sec  
 MCREST 0.00000000 sec  
 MCWRK 0.01500000 sec

===== CHANNEL f1 =====  
 NUC1 1H  
 P1 10.60 usec  
 PL1 0.00 dB  
 SFO1 300.1319508 MHz

F2 - Processing parameters  
 SI 16384  
 SF 300.1300109 MHz  
 WDW EM  
 SSB 0  
 LB 0.10 Hz  
 GB 0  
 PC 1.00

ID NMR plot parameters  
 CX 20.00 cm  
 CY 0.00 cm  
 FIP 13.954 ppm  
 F1 4188.11 Hz  
 F2P -1.027 ppm  
 F2 -308.29 Hz  
 PPMCM 0.74908 ppm/cm  
 HZCM 224.82013 Hz/cm

Current Data Parameters  
 NAME SNA acetaldehyde 13C 13C  
 EXPNO 1  
 PROCNO 1

F2 - Acquisition Parameters  
 Date\_ 20130518  
 Time 15.26  
 INSTRUM spect  
 PROBHD 5 mm Multinucl  
 PULPROG zgpg30  
 TD 65536  
 SOLVENT CDCl3  
 NS 256  
 DS 0  
 SWH 18832.393 Hz  
 FIDRES 0.287360 Hz  
 AQ 1.7400308 sec  
 RG 5792.6  
 DW 26.550 usec  
 DE 6.50 usec  
 TE 301.2 K  
 D1 1.50000000 sec  
 d11 0.03000000 sec  
 DELTA 1.39999998 sec  
 MCREST 0.00000000 sec  
 MCWRK 0.01500000 sec

===== CHANNEL f1 =====  
 NUC1 13C  
 P1 11.10 usec  
 PL1 0.00 dB  
 SFO1 75.4763978 MHz

===== CHANNEL f2 =====  
 CPDPRG2 waltz16  
 NUC2 1H  
 PCPD2 90.00 usec  
 PL2 0.00 dB  
 PL12 18.80 dB  
 PL13 21.80 dB  
 SFO2 300.1313506 MHz

F2 - Processing parameters  
 SI 32768  
 SF 75.4677534 MHz  
 WDW EM  
 SSB 0  
 LB 1.00 Hz  
 GB 0  
 PC 1.00

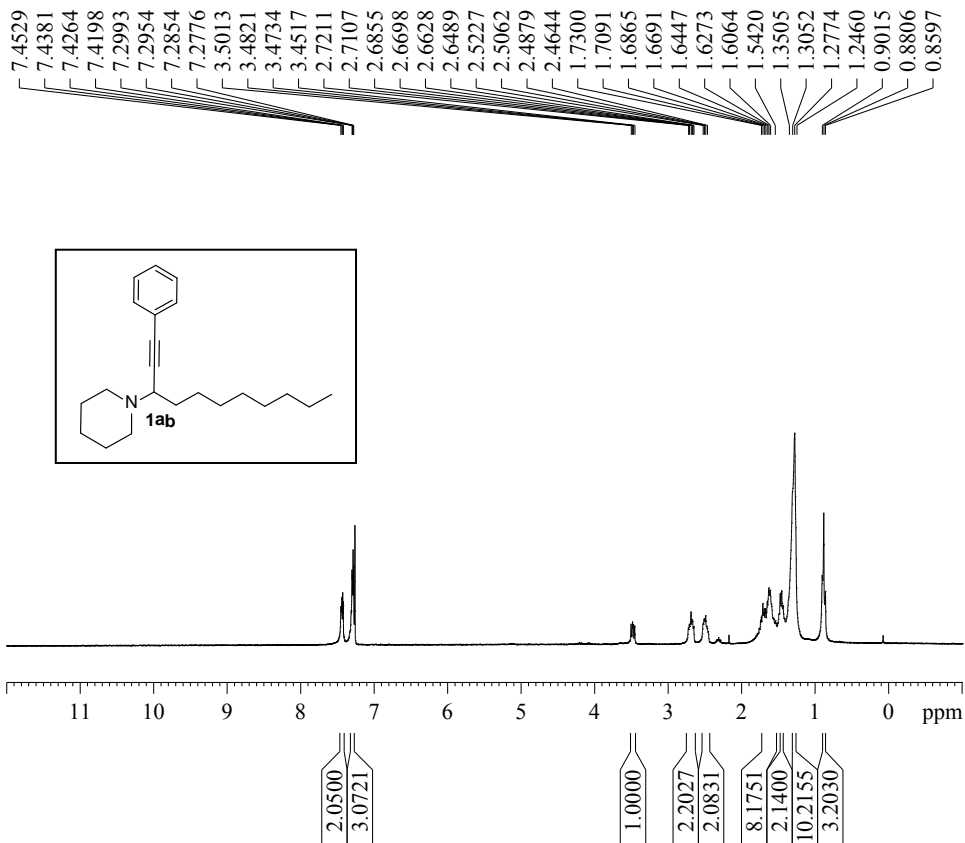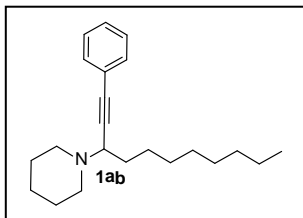

Current Data Parameters  
NAME SNA (CH2)7n H5agst  
EXPNO 1  
PROCNO 2

F2 - Acquisition Parameters  
Date\_ 20130805  
Time 11.22  
INSTRUM spect  
PROBHD 5 mm Multinucl  
PULPROG zg30  
TD 32768  
SOLVENT CDCl3  
NS 8  
DS 0  
SWH 4496.403 Hz  
FIDRES 0.137219 Hz  
AQ 3.6438515 sec  
RG 574.7  
DW 111.200 usec  
DE 6.50 usec  
TE 301.2 K  
D1 1.50000000 sec  
MCREST 0.00000000 sec  
MCWRK 0.01500000 sec

===== CHANNEL f1 =====  
NUC1 1H  
P1 10.60 usec  
PL1 0.00 dB  
SFO1 300.1319508 MHz

F2 - Processing parameters  
SI 16384  
SF 300.1300063 MHz  
WDW EM  
SSB 0  
LB 0.10 Hz  
GB 0  
PC 1.00

1D NMR plot parameters  
CX 20.00 cm  
CY 0.00 cm  
F1P 13.970 ppm  
F1 4192.77 Hz  
F2P -1.012 ppm  
F2 -303.63 Hz  
PPMCM 0.74908 ppm/cm  
HZCM 224.82013 Hz/cm

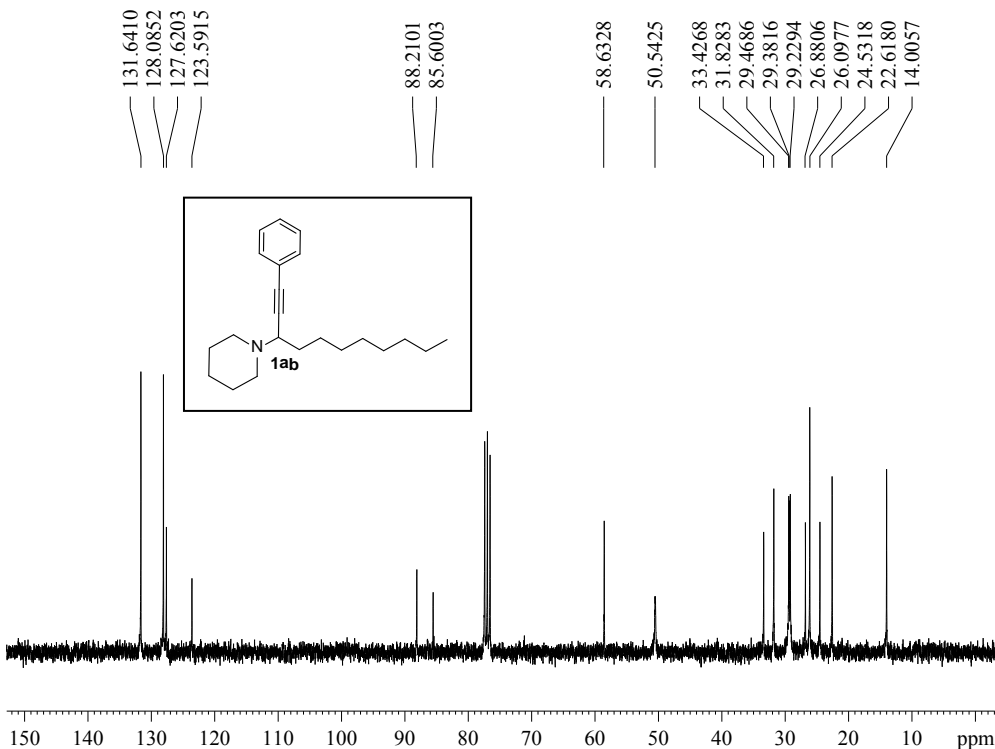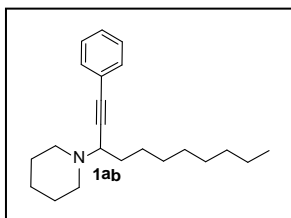

Current Data Parameters  
NAME SNA CH3(CH2)7 13C 13C  
EXPNO 1  
PROCNO 1

F2 - Acquisition Parameters  
Date\_ 20130518  
Time 14.44  
INSTRUM spect  
PROBHD 5 mm Multinucl  
PULPROG zgpg30  
TD 65536  
SOLVENT CDCl3  
NS 256  
DS 0  
SWH 18832.393 Hz  
FIDRES 0.287360 Hz  
AQ 1.7400308 sec  
RG 5792.6  
DW 26.550 usec  
DE 6.50 usec  
TE 301.2 K  
D1 1.50000000 sec  
d11 0.03000000 sec  
DELTA 1.39999998 sec  
MCREST 0.00000000 sec  
MCWRK 0.01500000 sec

===== CHANNEL f1 =====  
NUC1 13C  
P1 11.10 usec  
PL1 0.00 dB  
SFO1 75.4763978 MHz

===== CHANNEL f2 =====  
CPDPRG2 waltz16  
NUC2 1H  
PCPD2 90.00 usec  
PL2 0.00 dB  
PL12 18.80 dB  
PL13 21.80 dB  
SFO2 300.1313506 MHz

F2 - Processing parameters  
SI 32768  
SF 75.4677523 MHz  
WDW EM  
SSB 0  
LB 1.00 Hz  
GB 0  
PC 1.00

7.4538  
7.4394  
7.4294  
7.4216  
7.3132  
7.3002  
7.2967  
7.2871  
7.2793  
3.4969  
3.4782  
3.4678  
3.4469  
2.7077  
2.6972  
2.6833  
2.6702  
2.6607  
2.5193  
2.5014  
2.4836  
1.7126  
1.6847  
1.6290  
1.6116  
1.5768  
1.5525  
1.4759  
1.4550  
1.4341  
1.3610  
1.2984  
1.2670  
1.2392  
0.8981  
0.8737  
0.8528

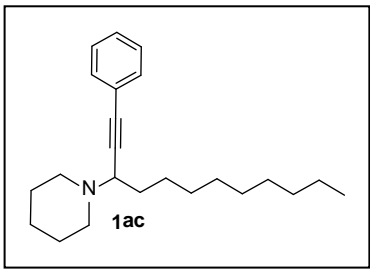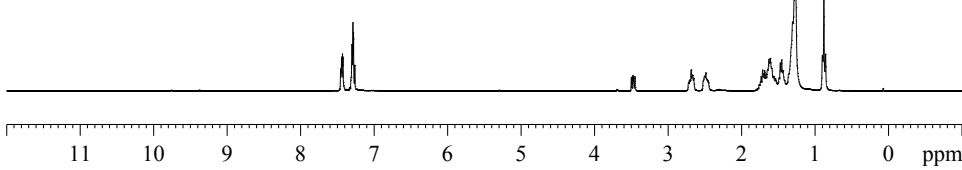

2.0557  
3.0047  
1.0003  
2.0262  
2.0364  
6.2251  
2.3438  
14.4288  
3.0228

131.6706  
128.1049  
127.6121  
123.5536

88.0703  
85.5772

58.5589

33.3815  
31.8523  
29.5078  
29.3592  
29.2577  
26.8443  
26.1196  
24.5252  
22.6409  
14.0599

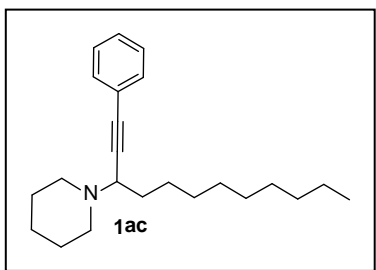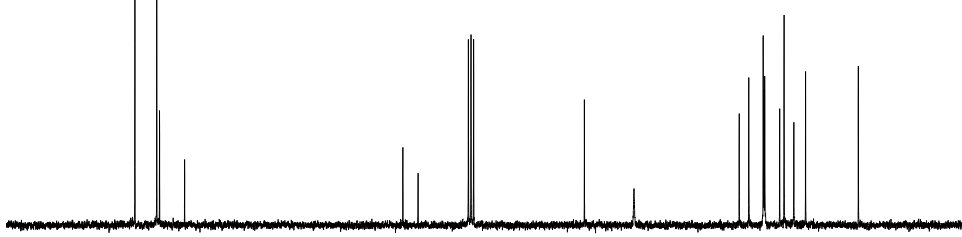

131.6706  
128.1049  
127.6121  
123.5536  
88.0703  
85.5772  
58.5589  
33.3815  
31.8523  
29.5078  
29.3592  
29.2577  
26.8443  
26.1196  
24.5252  
22.6409  
14.0599

Current Data Parameters  
NAME SNA 373 proton  
EXPNO 3  
PROCNO 1

F2 - Acquisition Parameters  
Date\_ 20130321  
Time 22.48  
INSTRUM spect  
PROBHD 5 mm Multinucl  
PULPROG zg30  
TD 32768  
SOLVENT CDC13  
NS 20  
DS 0  
SWH 4496.403 Hz  
FIDRES 0.137219 Hz  
AQ 3.6438515 sec  
RG 287.4  
DW 111.200 usec  
DE 6.50 usec  
TE 297.2 K  
D1 1.50000000 sec  
MCREST 0.00000000 sec  
MCWRK 0.01500000 sec

==== CHANNEL f1 =====  
NUC1 1H  
P1 10.60 usec  
PL1 0.00 dB  
SFO1 300.1319508 MHz

F2 - Processing parameters  
SI 16384  
SF 300.1300065 MHz  
WDW EM  
SSB 0  
LB 0.10 Hz  
GB 0  
PC 1.00

1D NMR plot parameters  
CX 20.00 cm  
CY 0.00 cm  
FIP 13969 ppm  
F1 4192.50 Hz  
F2P -1.013 ppm  
F2 -303.90 Hz  
PPMCM 0.74908 ppm/cm  
HZCM 224.82013 Hz/cm

Current Data Parameters  
NAME SNA decyl 13C  
EXPNO 1  
PROCNO 1

F2 - Acquisition Parameters  
Date\_ 20130518  
Time 13.47  
INSTRUM spect  
PROBHD 5 mm Multinucl  
PULPROG zgpg30  
TD 65536  
SOLVENT CDC13  
NS 256  
DS 0  
SWH 18832.393 Hz  
FIDRES 0.287360 Hz  
AQ 1.7400308 sec  
RG 5792.6  
DW 26.550 usec  
DE 6.50 usec  
TE 301.2 K  
D1 1.50000000 sec  
d11 0.03000000 sec  
DELTA 1.39999998 sec  
MCREST 0.00000000 sec  
MCWRK 0.01500000 sec

==== CHANNEL f1 =====  
NUC1 13C  
P1 11.10 usec  
PL1 0.00 dB  
SFO1 75.4763978 MHz

==== CHANNEL f2 =====  
CPDPRG2 waltz16  
NUC2 1H  
PCPD2 90.00 usec  
PL2 0.00 dB  
PL12 18.80 dB  
PL13 21.80 dB  
SFO2 300.1313506 MHz

F2 - Processing parameters  
SI 32768  
SF 75.4677543 MHz  
WDW EM  
SSB 0  
LB 1.00 Hz  
GB 0  
PC 1.00

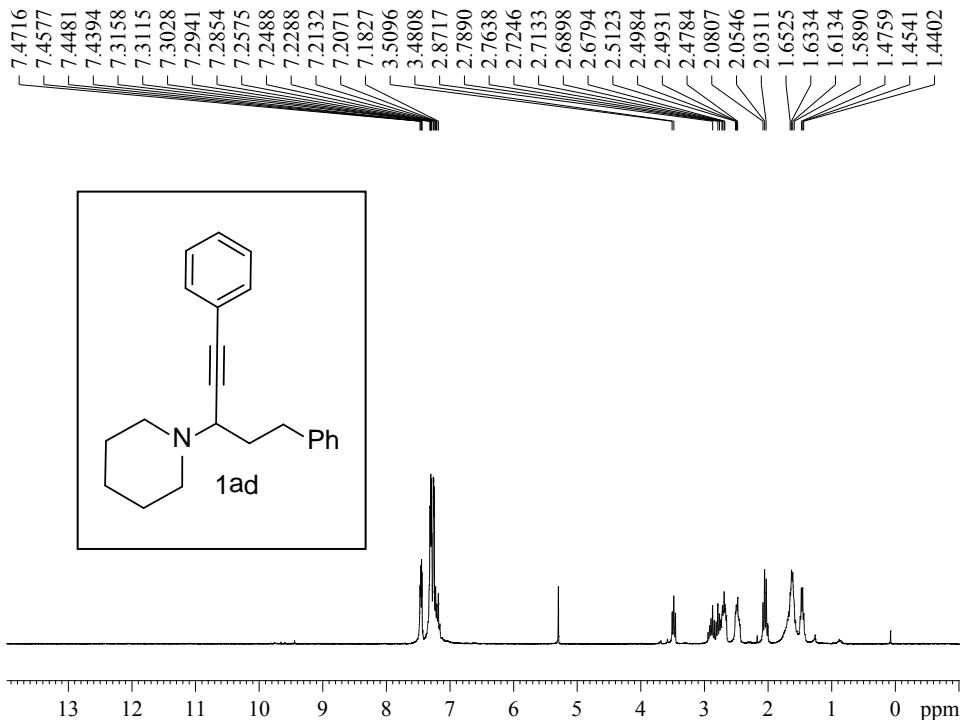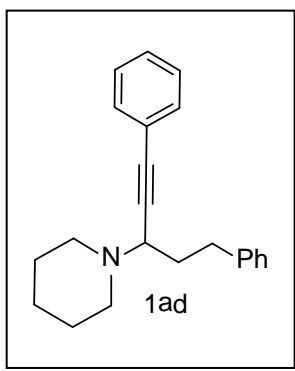

Current Data Parameters  
 NAME SNA 371 proton new  
 EXPNO 1  
 PROCNO 1

F2 - Acquisition Parameters  
 Date 20130320  
 Time 16.03  
 INSTRUM spect  
 PROBHD 5 mm Multinucl  
 PULPROG zg30  
 TD 32768  
 SOLVENT CDCl3  
 NS 8  
 DS 0  
 SWH 4496.403 Hz  
 FIDRES 0.137219 Hz  
 AQ 3.6438515 sec  
 RG 574.7  
 DW 111.200 usec  
 DE 6.50 usec  
 TE 298.2 K  
 D1 1.50000000 sec  
 MCREST 0.00000000 sec  
 MCWRK 0.01500000 sec

==== CHANNEL f1 =====  
 NUC1 1H  
 P1 10.60 usec  
 PL1 0.00 dB  
 SFO1 300.1319508 MHz

F2 - Processing parameters  
 SI 16384  
 SF 300.1300067 MHz  
 WDW EM  
 SSB 0  
 LB 0.10 Hz  
 GB 0  
 PC 1.00

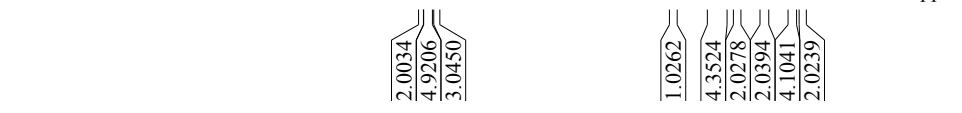

141.4764  
 131.4750  
 128.3441  
 128.0542  
 127.9527  
 127.5541  
 125.5683  
 123.2492

87.4760  
 85.8816

57.2544

50.2389

34.7875

32.6133

25.9602

Current Data Parameters  
 NAME SNA Ph(CH2)2 13C 13C  
 EXPNO 1  
 PROCNO 1

F2 - Acquisition Parameters  
 Date 20130518  
 Time 15.04  
 INSTRUM spect  
 PROBHD 5 mm Multinucl  
 PULPROG zgpg30  
 TD 65536  
 SOLVENT CDCl3  
 NS 256  
 DS 0  
 SWH 18832.393 Hz  
 FIDRES 0.287360 Hz  
 AQ 1.7400308 sec  
 RG 5792.6  
 DW 26.550 usec  
 DE 6.50 usec  
 TE 301.2 K  
 D1 1.50000000 sec  
 d11 0.03000000 sec  
 DELTA 1.39999998 sec  
 MCREST 0.00000000 sec  
 MCWRK 0.01500000 sec

==== CHANNEL f1 =====  
 NUC1 13C  
 P1 11.10 usec  
 PL1 0.00 dB  
 SFO1 75.4763978 MHz

==== CHANNEL f2 =====  
 CPDPRG2 waltz16  
 NUC2 1H  
 FCPD2 90.00 usec  
 PL2 0.00 dB  
 PL12 18.80 dB  
 PL13 21.80 dB  
 SFO2 300.1313506 MHz

F2 - Processing parameters  
 SI 32768  
 SF 75.4677500 MHz  
 WDW EM  
 SSB 0  
 LB 1.00 Hz  
 GB 0  
 PC 1.00

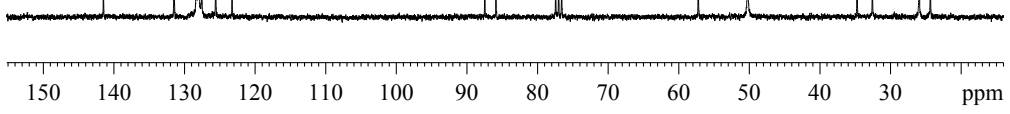

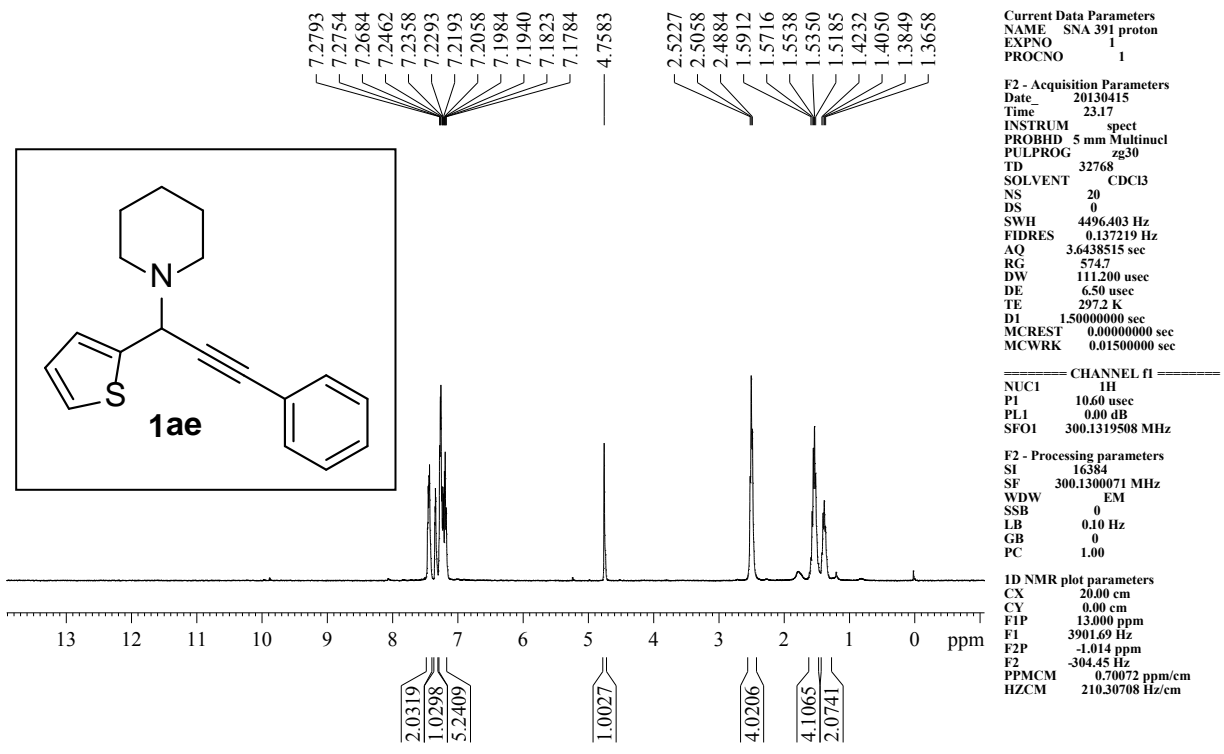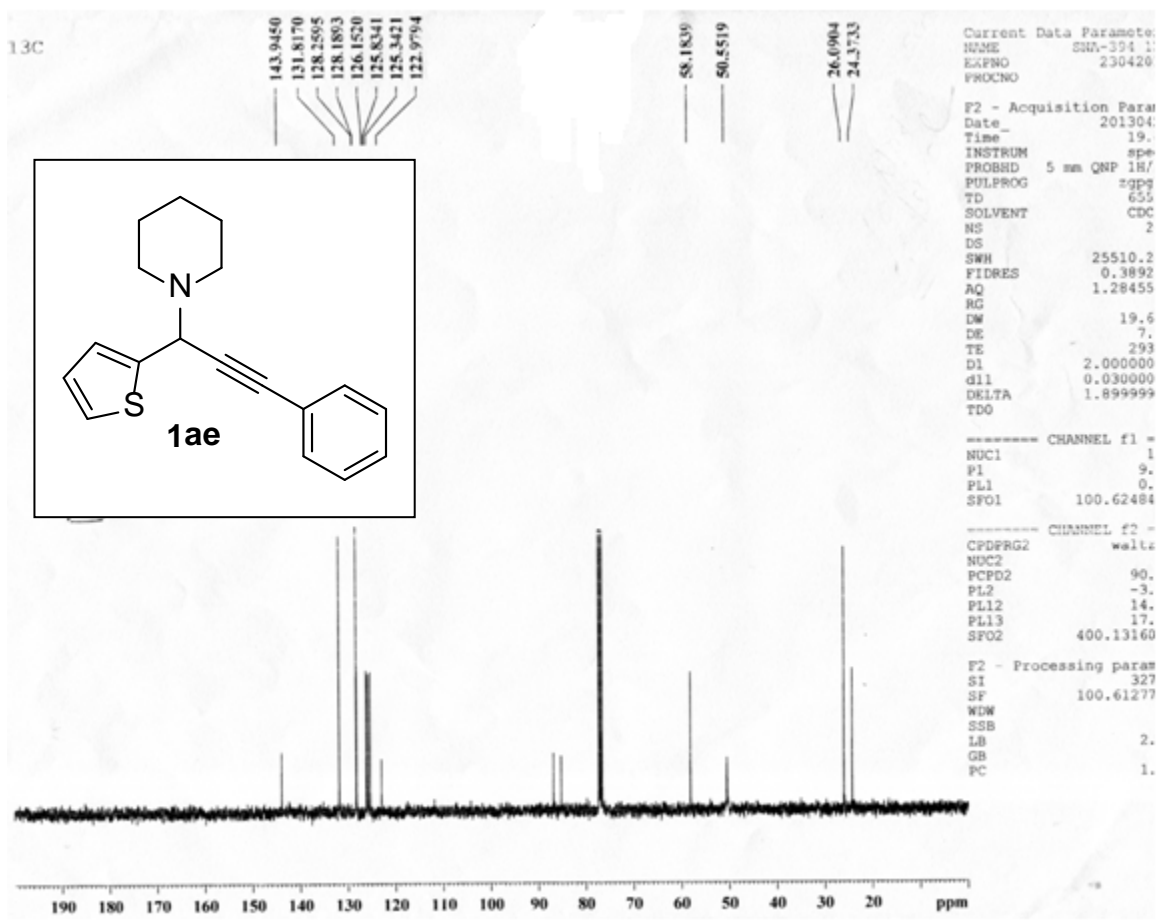

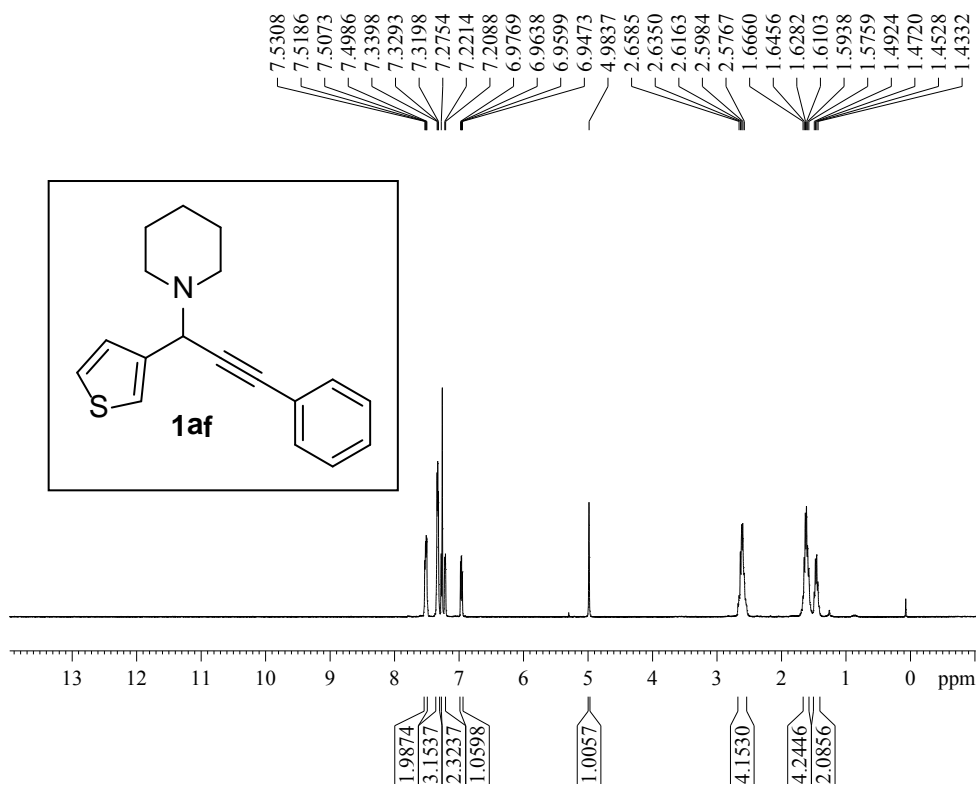

Current Data Parameters  
 NAME SNA 394 proton  
 EXPNO 1  
 PROCNO 1

F2 - Acquisition Parameters  
 Date\_ 20130423  
 Time 12.25  
 INSTRUM spect  
 PROBHD 5 mm Multinucl  
 PULPROG zg30  
 TD 32768  
 SOLVENT CDCl3  
 NS 20  
 DS 0  
 SWH 4496.403 Hz  
 FIDRES 0.137219 Hz  
 AQ 3.6438515 sec  
 RG 812.7  
 DW 111.200 usec  
 DE 6.50 usec  
 TE 297.2 K  
 D1 1.5000000 sec  
 MCREST 0.0000000 sec  
 MCWRK 0.0150000 sec

===== CHANNEL f1 =====  
 NUC1 1H  
 P1 10.60 usec  
 PL1 0.00 dB  
 SFO1 300.1319508 MHz

F2 - Processing parameters  
 SI 16364  
 SF 300.1300065 MHz  
 WDW EM  
 SSB 0  
 LB 0.10 Hz  
 GB 0  
 PC 1.00

1D NMR plot parameters  
 CX 20.00 cm  
 CY 0.00 cm  
 F1P 13.969 ppm  
 F1 4192.50 Hz  
 F2P -1.013 ppm  
 F2 -303.90 Hz  
 PPMCM 0.74908 ppm/cm  
 HZCM 224.82013 Hz/cm

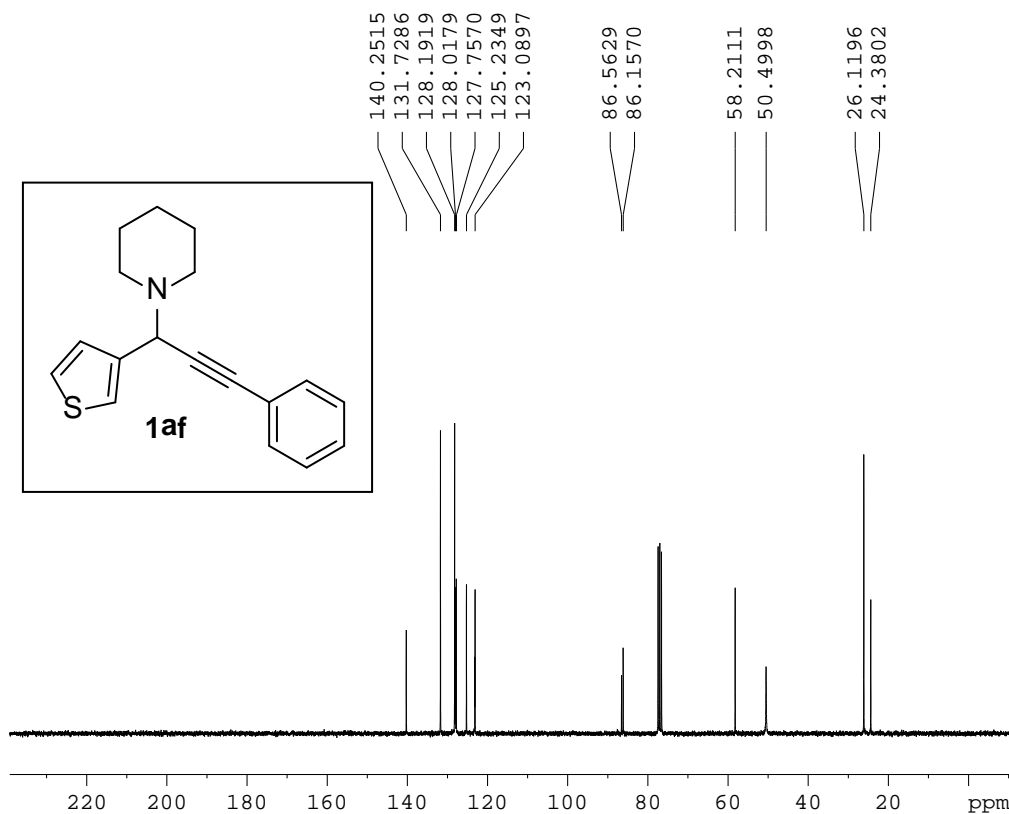

Current Data Parameters  
 NAME SNA 391 C13  
 EXPNO 1  
 PROCNO 1

F2 - Acquisition Parameters  
 Date\_ 20130416  
 Time 0.19  
 INSTRUM spect  
 PROBHD 5 mm Multinucl  
 PULPROG zgpg30  
 TD 65536  
 SOLVENT CDCl3  
 NS 1000  
 DS 0  
 SWH 18832.393 Hz  
 FIDRES 0.287360 Hz  
 AQ 1.7400308 sec  
 RG 14596.5  
 DW 26.550 usec  
 DE 6.50 usec  
 TE 297.2 K  
 D1 1.5000000 sec  
 d11 0.0300000 sec  
 DELTA 1.3999998 sec  
 MCREST 0.0000000 sec  
 MCWRK 0.0150000 sec

===== CHANNEL f1 =====  
 NUC1 13C  
 P1 11.10 usec  
 PL1 0.00 dB  
 SFO1 75.4763978 MHz

===== CHANNEL f2 =====  
 CPDPRG2 waltz16  
 NUC2 1H  
 PCPD2 90.00 usec  
 PL2 0.00 dB  
 PL12 18.80 dB  
 PL13 21.80 dB  
 SFO2 300.1313506 MHz

F2 - Processing parameters  
 SI 32768  
 SF 75.4677614 MHz  
 WDW EM  
 SSB 0  
 LB 1.00 Hz  
 GB 0  
 PC 1.00

1D NMR plot parameters  
 CX 20.00 cm  
 CY 12.50 cm  
 F1P 239.209 ppm  
 F1 18052.53 Hz  
 F2P -10.334 ppm  
 F2 -779.86 Hz  
 PPMCM 12.47711 ppm/cm  
 HZCM 941.61951 Hz/cm

<sup>1</sup>H, <sup>13</sup>C, Spectra of fused triazoles [2a-2t]

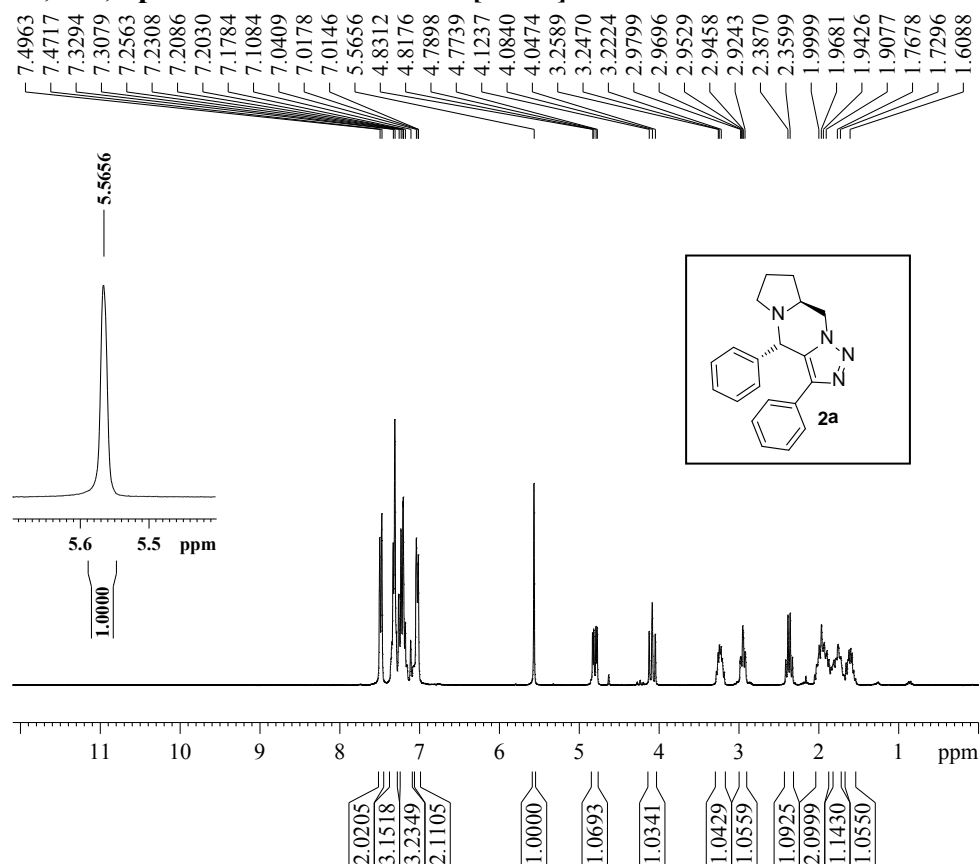

Current Data Parameters  
 NAME SNA T  
 EXPNO 2  
 PROCNO 1  
 F2 - Acquisition Parameters  
 Date 20130510  
 Time 23.31  
 INSTRUM spect  
 PROBHD 5 mm Multinucl  
 PULPROG zg30  
 TD 32768  
 SOLVENT CDCl3  
 NS 4  
 DS 0  
 SWH 4496.403 Hz  
 FIDRES 0.137219 Hz  
 AQ 3.6438515 sec  
 RG 256  
 DW 111.200 usec  
 DE 6.50 usec  
 TE 298.2 K  
 DI 1.50000000 sec  
 MCREST 0.00000000 sec  
 MCWRK 0.01500000 sec

===== CHANNEL f1 =====  
 NUC1 1H  
 P1 10.60 usec  
 PL1 0.00 dB  
 SFO1 300.1319508 MHz

F2 - Processing parameters  
 SI 16384  
 SF 300.1300057 MHz  
 WDW EM  
 SSB 0  
 LB 0.10 Hz  
 GB 0  
 PC 1.00

ID NMR plot parameters  
 CX 20.00 cm  
 CY 0.00 cm  
 FIP 13.972 ppm  
 F1 4193.32 Hz  
 F2 -1.010 ppm  
 F2 -303.08 Hz  
 PPMCM 0.74908 ppm/cm  
 HZCM 224.82014 Hz/cm

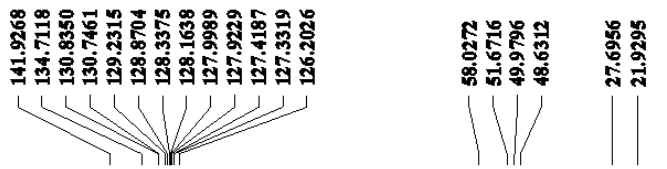

Current Data Parameters  
 NAME sld ben T 13C ta1a  
 EXPNO 1  
 PROCNO 1

F2 - Acquisition Parameters  
 Date 20131020  
 Time 23.07  
 INSTRUM spect  
 PROBHD 5 mm Multinucl  
 PULPROG zgpg30  
 TD 65536  
 SOLVENT CDCl3  
 NS 192  
 DS 0  
 SWH 18832.393 Hz  
 FIDRES 0.287360 Hz  
 AQ 1.7400308 sec  
 RG 5792.6  
 DW 26.550 usec  
 DE 6.50 usec  
 TE 302.2 K  
 DI 1.50000000 sec  
 d11 0.03000000 sec  
 DELTA 1.39999998 sec  
 MCREST 0.00000000 sec  
 MCWRK 0.01500000 sec

===== CHANNEL f1 =====  
 NUC1 13C  
 P1 11.10 usec  
 PL1 0.00 dB  
 SFO1 75.4763978 MHz

===== CHANNEL f2 =====  
 CPDPRG2 waltz16  
 NUC2 1H  
 PCPD2 90.00 usec  
 PL2 0.00 dB  
 PL12 18.80 dB  
 PL13 21.80 dB  
 SFO2 300.1313506 MHz

F2 - Processing parameters  
 SI 32768  
 SF 75.4677614 MHz  
 WDW EM  
 SSB 0  
 LB 1.00 Hz  
 GB 0  
 PC 1.00



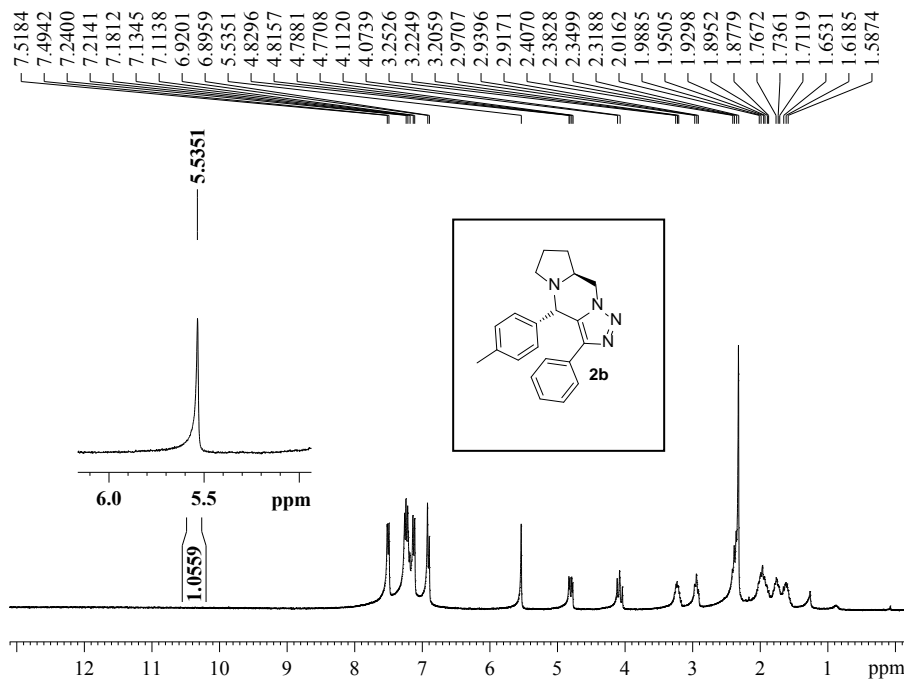

Current Data Parameters  
 NAME skl p ch3 taflo  
 EXPNO 1  
 PROCNO 1

F2 - Acquisition Parameters  
 Date 20131020  
 Time 22.31  
 INSTRUM spect  
 PROBHD 5 mm Multinucl  
 PULPROG zg30  
 TD 32768  
 SOLVENT CDCl3  
 NS 8  
 DS 0  
 SWH 4496.403 Hz  
 FIDRES 0.137219 Hz  
 AQ 3.6438515 sec  
 RG 512  
 DW 111.200 usec  
 DE 6.50 usec  
 TE 302.2 K  
 D1 1.5000000 sec  
 MCREST 0.0000000 sec  
 MCWRK 0.0150000 sec

==== CHANNEL f1 =====  
 NUC1 1H  
 P1 10.60 usec  
 PL1 0.00 dB  
 SFO1 300.1319508 MHz

F2 - Processing parameters  
 SI 16384  
 SF 300.1300057 MHz  
 WDW EM  
 SSB 0  
 LB 0.10 Hz  
 GB 0  
 PC 1.00

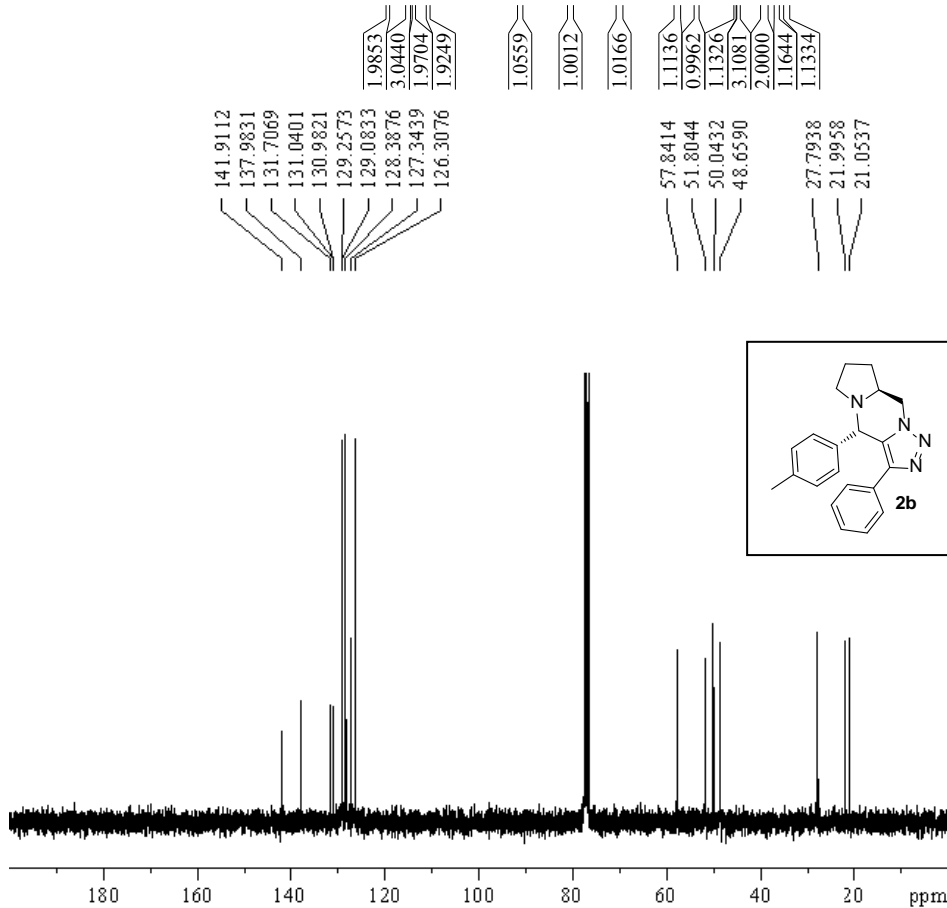

Current Data Parameters  
 NAME SNA 18 13C  
 EXPNO 2  
 PROCNO 1

F2 - Acquisition Parameters  
 Date 20130511  
 Time 0.46  
 INSTRUM spect  
 PROBHD 5mm Multinucl  
 PULPROG zgpg30  
 TD 65536  
 SOLVENT CDCl3  
 NS 1000  
 DS 0  
 SWH 18832.203 Hz  
 FIDRES 0.287560 Hz  
 AQ 1.740308 sec  
 RG 322.6  
 DW 26.550 usec  
 DE 6.50 usec  
 TE 300.2 K  
 D1 1.5000000 sec  
 d11 0.0300000 sec  
 DELTA 1.3999998 sec  
 MCREST 0.0000000 sec  
 MCWRK 0.0150000 sec

==== CHANNEL f1 =====  
 NUC1 13C  
 P1 11.10 usec  
 PL1 0.00 dB  
 SFO1 75.4763078 MHz

==== CHANNEL f2 =====  
 CPDPRG2 waltz16  
 NUC2 1H  
 PCPD2 90.00 usec  
 PL2 0.00 dB  
 PL12 18.80 dB  
 PL13 21.80 dB  
 SFO2 300.1313006 MHz

F2 - Processing parameters  
 SI 32768  
 SF 754677.222 MHz  
 WDW EM  
 SSB 0  
 LB 1.00 Hz  
 GB 0  
 PC 1.00

1D NMR plot parameters  
 CX 20.00 cm  
 CY 12.50 cm  
 FID 239.323 ppm  
 F1 1806.115 Hz  
 F2 -10.219 ppm  
 F2 -771.24 Hz  
 FPMCM 124.771 ppm/cm  
 HZCM 941.61931 Hz/cm

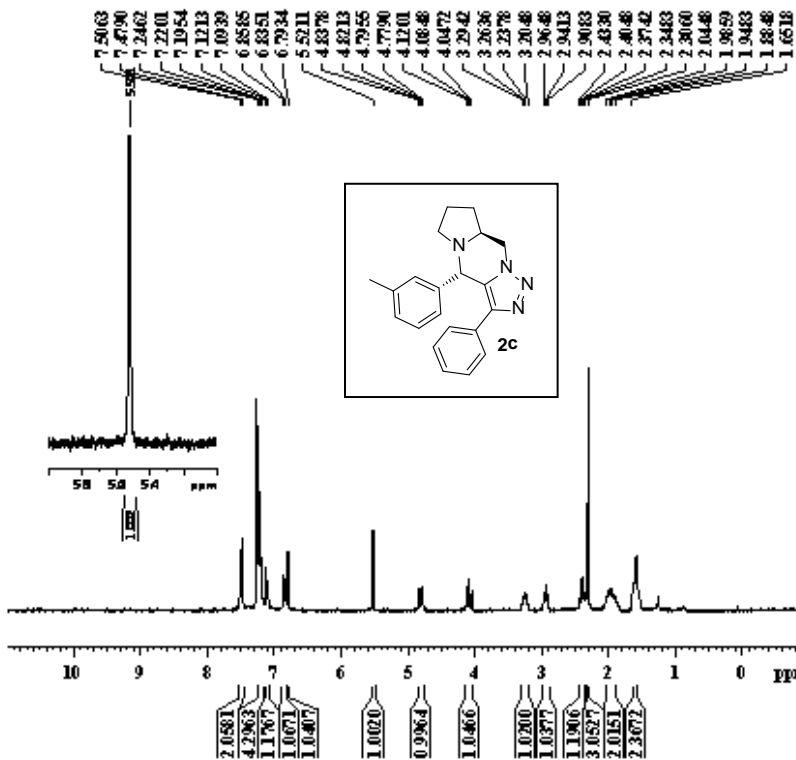

Current Data Parameters  
 NAME sblmch3.taflo  
 EXPN0 1  
 PRO CNO 1

F2 - Acquisition Parameters  
 Date 20131020  
 Time 22.27  
 INSTRUM spect  
 PROBHD 5mm Multinuc  
 PULPROG zg30  
 TD 32768  
 SOLVENT CDCl3  
 NS 8  
 DS 0  
 SWH 4486.403 Hz  
 FIDRES 0.137219 Hz  
 AQ 3.6438515 sec  
 RG 72.41  
 DW 111.200 usec  
 DE 6.50 usec  
 TE 302.2 K  
 DI 150000000 sec  
 MCREST 0.0000000 sec  
 MCWREK 0.0150000 sec

==== CHANNEL f1 =====  
 NUC1 1H  
 P1 10.60 usec  
 PL1 0.00 dB  
 SF01 300.1319508 MHz

F2 - Processing parameters  
 SI 16384  
 SF 300.1300059 MHz  
 WDW EM  
 SSB 0  
 LB 0.10 Hz  
 GB 0  
 FC 1.00

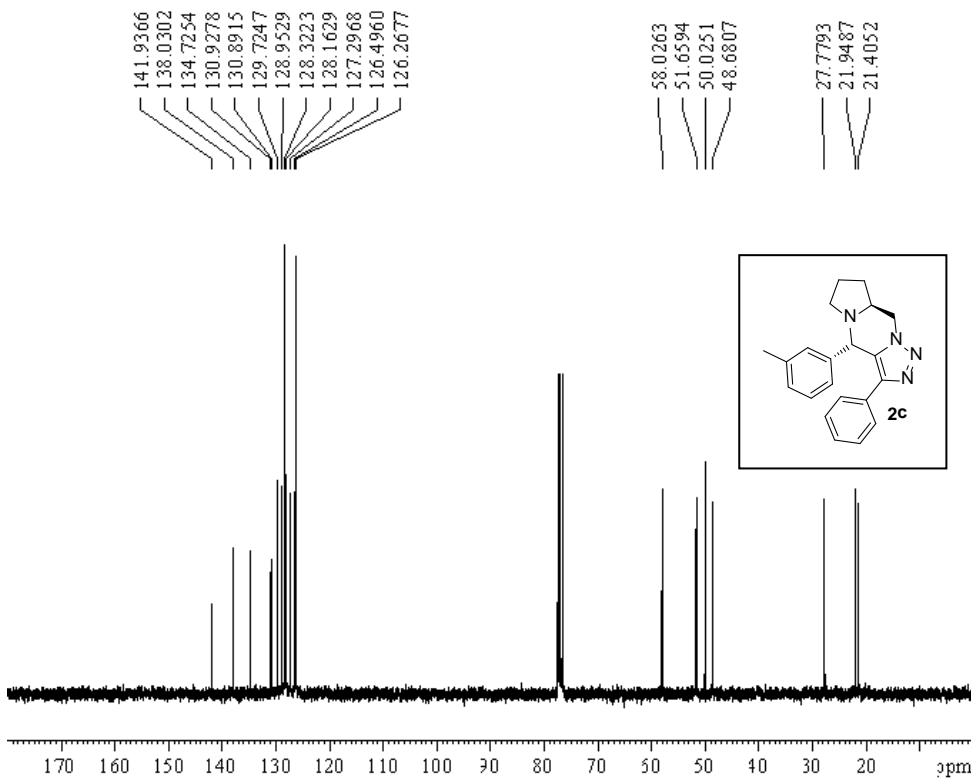

Current Data Parameters  
 NAME SNAAL7 C13  
 EXPN0 1  
 PRO CNO 1

F2 - Acquisition Parameters  
 Date 20130808  
 Time 4.01  
 INSTRUM spect  
 PROBHD 5mm Multinuc  
 PULPROG zgpg30  
 TD 66536  
 SOLVENT CDCl3  
 NS 1000  
 DS 0  
 SWH 18322.393 Hz  
 FIDRES 0.287360 Hz  
 AQ 1.7400308 sec  
 RG 18396.4  
 DW 26.550 usec  
 DE 6.50 usec  
 TE 300.2 K  
 DI 150000000 sec  
 d11 0.0300000 sec  
 DELTA 1.3999998 sec  
 MCREST 0.0000000 sec  
 MCWREK 0.0150000 sec

==== CHANNEL f1 =====  
 NUC1 13C  
 P1 11.10 usec  
 PL1 0.00 dB  
 SF01 75.4763978 MHz

==== CHANNEL f2 =====  
 CDFRC2 waltz16  
 NUC2 1H  
 P CDF2 90.00 usec  
 PL2 0.00 dB  
 PL12 18.80 dB  
 PL13 21.80 dB  
 SF02 300.131806 MHz

F2 - Processing parameters  
 SI 32768  
 SF 75.4675551 MHz  
 WDW BH  
 SSB 0  
 LB 1.00 Hz  
 GB 0  
 FC 1.00

1D NMR plot parameters  
 CX 20.00 cm  
 CY 12.50 cm  
 FID 239.232 ppm  
 F1 18458.85 Hz  
 F2 -773.54 Hz  
 F2CM 12.47711 ppm/cm  
 WZ FM 8.0 619.0 15.5 cm

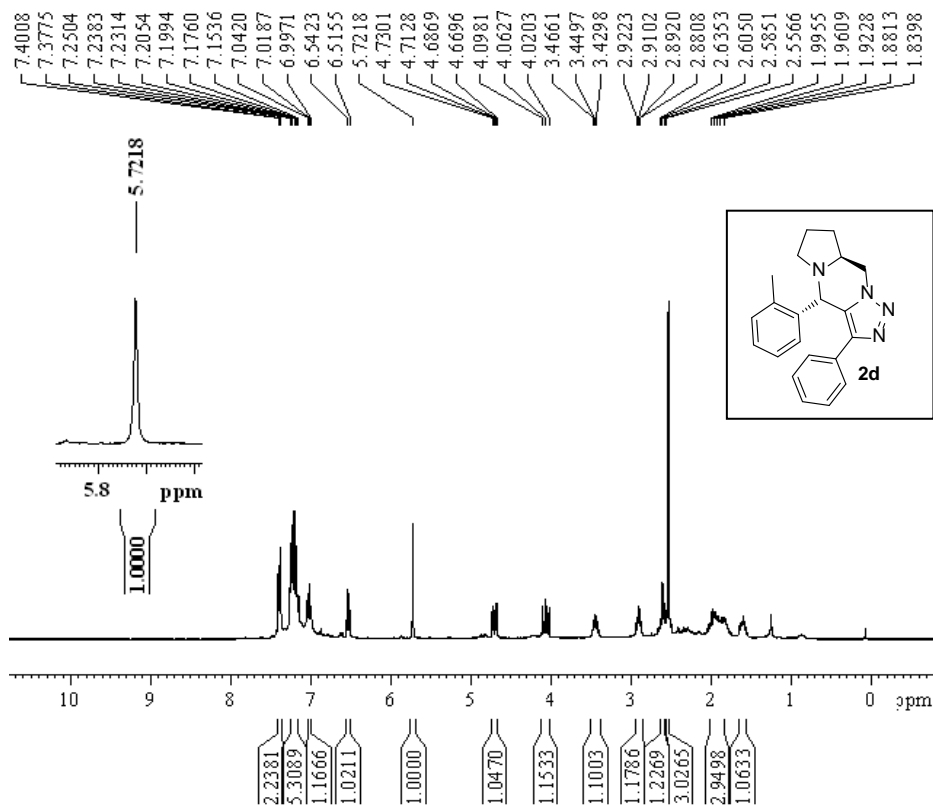

Current Data Parameters  
 NAME SNA A.20.113C  
 EXPNO 1  
 PROCNO 1

F2 - Acquisition Parameters  
 Date\_ 20130510  
 Time 15.37  
 INSTRUM spect  
 PROBHD 5 mm Multiview1  
 PULPROG zg30  
 TD 32768  
 SOLVENT CD CB  
 NS 5  
 DS 0  
 SWH 4496.403 Hz  
 FIDRES 0.137219 Hz  
 AQ 3.6438515 sec  
 RG 256  
 DW 111.200 usec  
 DE 6.50 usec  
 TE 298.2 K  
 D1 1.5000000 sec  
 MCREST 0.0000000 sec  
 MCWRTK 0.0150000 sec

==== CHANNEL f1 =====  
 NUC1 1H  
 P1 10.60 usec  
 PL1 0.00 dB  
 SFO1 300.1319508 MHz

F2 - Processing parameters  
 SI 16384  
 SF 300.1300089 MHz  
 WDW EM  
 SSB 0  
 LB 0.10 Hz  
 GB 0  
 PC 1.00

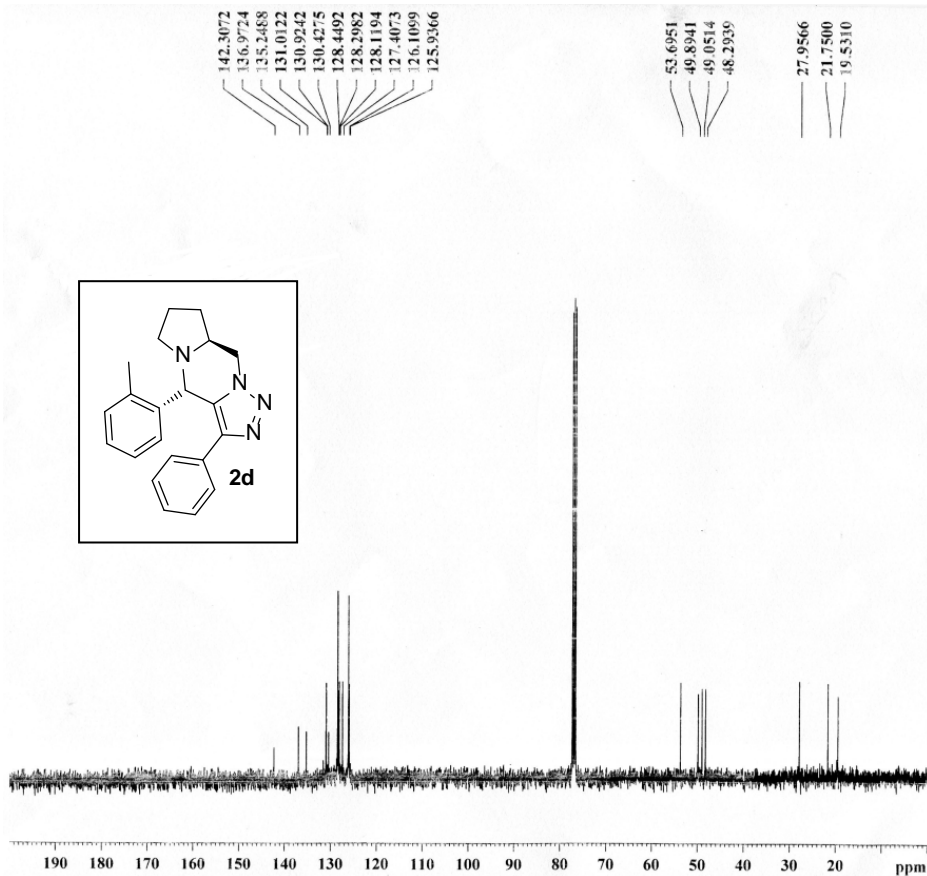

Current Data Parameters  
 NAME SNA-20.13C  
 EXPNO 10052013  
 PROCNO 1

F2 - Acquisition Parame  
 Date\_ 20130510  
 Time\_ 19.42  
 INSTRUM spect  
 PROBHD 5 mm QNP 1H/13  
 PULPROG zgpg30  
 TD 65536  
 SOLVENT CDCl3  
 NS 250  
 DS 0  
 SWH 25510.203  
 FIDRES 0.389255  
 AQ 1.2845556  
 RG 4  
 DW 19.600  
 DE 7.00  
 TE 295.0  
 D1 2.0000000  
 d11 0.0300000  
 DELTA 1.8999999  
 TD0 1

==== CHANNEL f1 ===  
 NUC1 13C  
 P1 9.80  
 PL1 0.00  
 SFO1 100.6248425

==== CHANNEL f2 ===  
 CPDPRG2 waltz16  
 NUC2 1H  
 PCPD2 90.00  
 PL2 -3.00  
 PL12 14.00  
 PL13 17.00  
 SFO2 400.1316005

F2 - Processing paramet  
 SI 32768  
 SF 100.6127767  
 WDW EM  
 SSB 0  
 LB 2.00  
 GB 0  
 PC 1.00

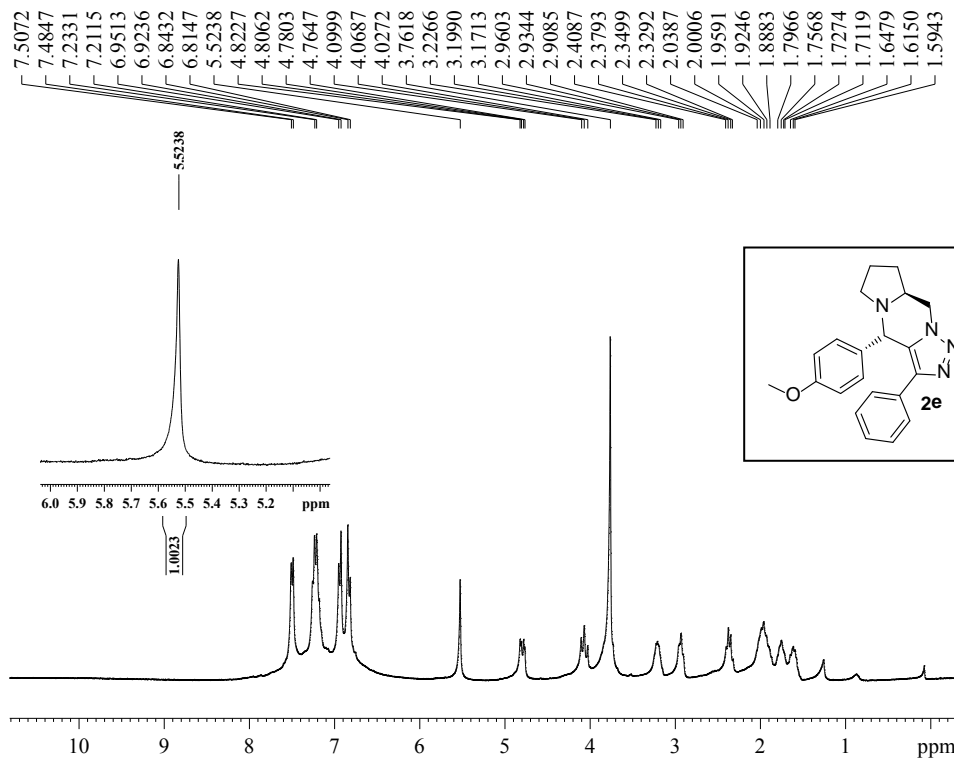

Current Data Parameters  
 NAME skl p-0ch3 tafto  
 EXPNO 1  
 PROCNO 1

F2 - Acquisition Parameters  
 Date 20131020  
 Time 22:37  
 INSTRUM spect  
 PROBHD 5 mm Multinucl  
 PULPROG zg30  
 TD 32768  
 SOLVENT CDCl3  
 NS 8  
 DS 0  
 SWH 496.403 Hz  
 FIDRES 0.137219 Hz  
 AQ 3.6438515 sec  
 RG 228.1  
 DW 111.200 usec  
 DE 6.50 usec  
 TE 302.2 K  
 D1 1.50000000 sec  
 MCREST 0.00000000 sec  
 MCWRK 0.01500000 sec

CHANNEL f1  
 NUC1 1H  
 P1 10.60 usec  
 PL1 0.00 dB  
 SFO1 300.1319508 MHz

F2 - Processing parameters  
 SI 16384  
 SF 300.1300046 MHz  
 WDW EM  
 SSB 0  
 LB 0.10 Hz  
 GB 0  
 PC 1.00

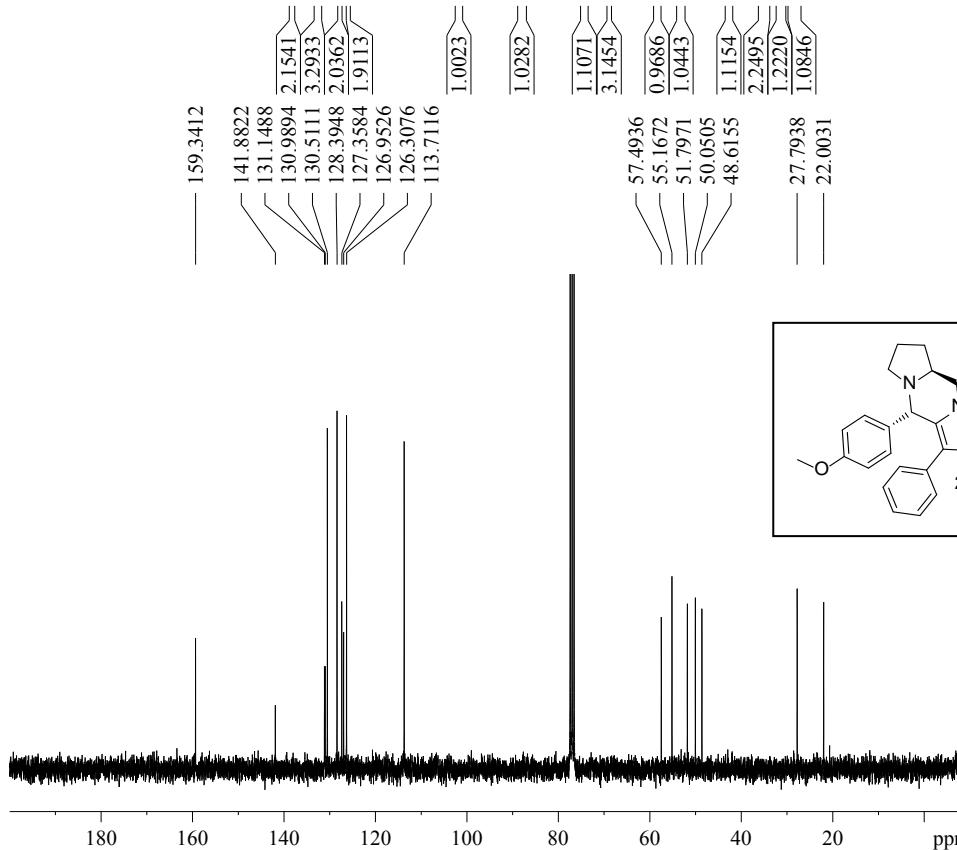

Current Data Parameters  
 NAME SNA A24 C13  
 EXPNO 1  
 PROCNO 1

F2 - Acquisition Parameters  
 Date 20130508  
 Time 2:00  
 INSTRUM spect  
 PROBHD 5 mm Multinucl  
 PULPROG zgpg30  
 TD 65536  
 SOLVENT CDCl3  
 NS 1000  
 DS 0  
 SWH 18832.393 Hz  
 FIDRES 0.287360 Hz  
 AQ 1.7400308 sec  
 RG 5792.6  
 DW 26.550 usec  
 DE 6.50 usec  
 TE 300.2 K  
 D1 1.50000000 sec  
 d11 0.03000000 sec  
 DELTA 1.39999998 sec  
 MCREST 0.00000000 sec  
 MCWRK 0.01500000 sec

CHANNEL f1  
 NUC1 13C  
 P1 11.10 usec  
 PL1 0.00 dB  
 SFO1 75.4763978 MHz

CHANNEL f2  
 CPDPRG2 waltz16  
 NUC2 1H  
 PCPD2 90.00 usec  
 PL2 0.00 dB  
 PL12 18.80 dB  
 PL13 21.80 dB  
 SFO2 300.1313506 MHz

F2 - Processing parameters  
 SI 32768  
 SF 75.4677523 MHz  
 WDW EM  
 SSB 0  
 LB 1.00 Hz  
 GB 0  
 PC 1.00

1D NMR plot parameters  
 CX 20.00 cm  
 CY 12.50 cm  
 FIP 220.000 ppm  
 F1 16602.90 Hz  
 F2P 0.000 ppm  
 F2 0.00 Hz  
 PPMCM 11.00000 ppm/cm  
 HZCM 830.14520 Hz/cm

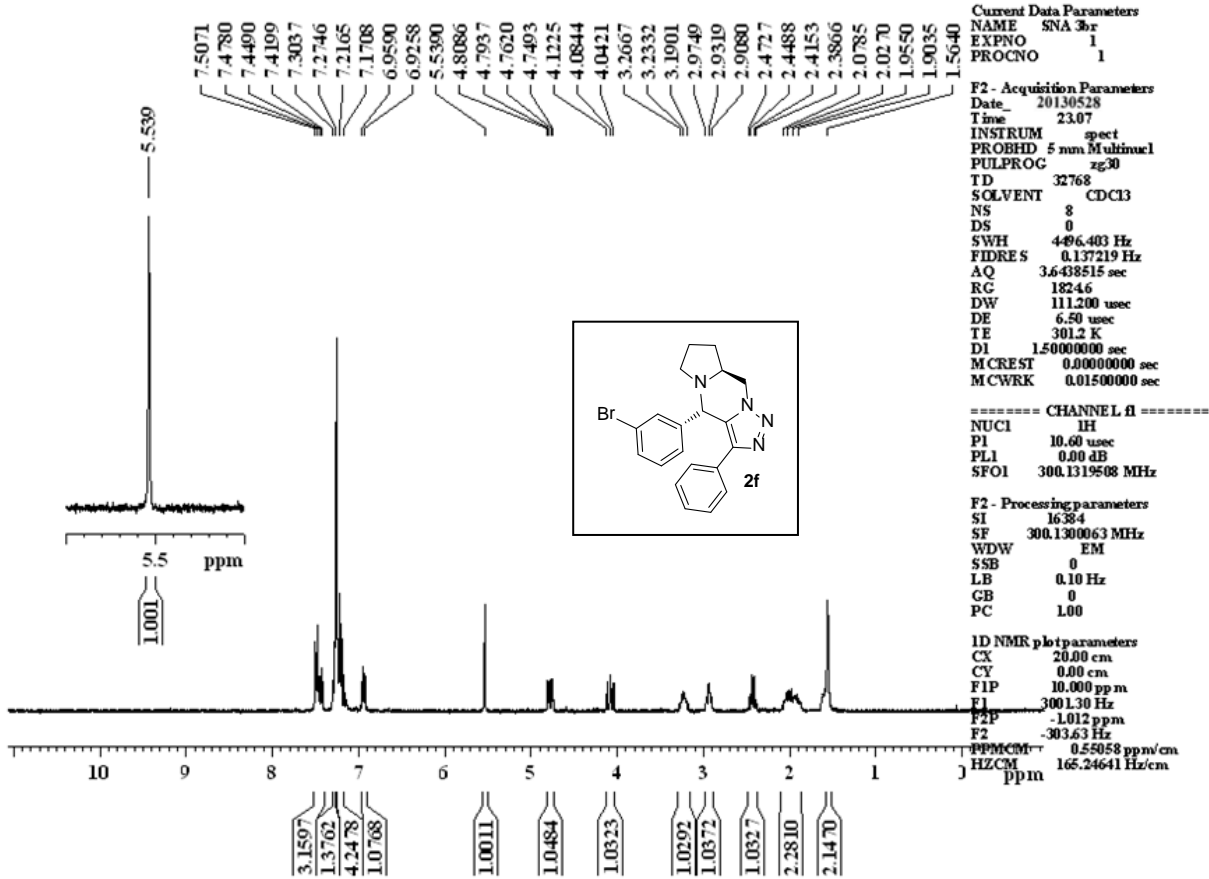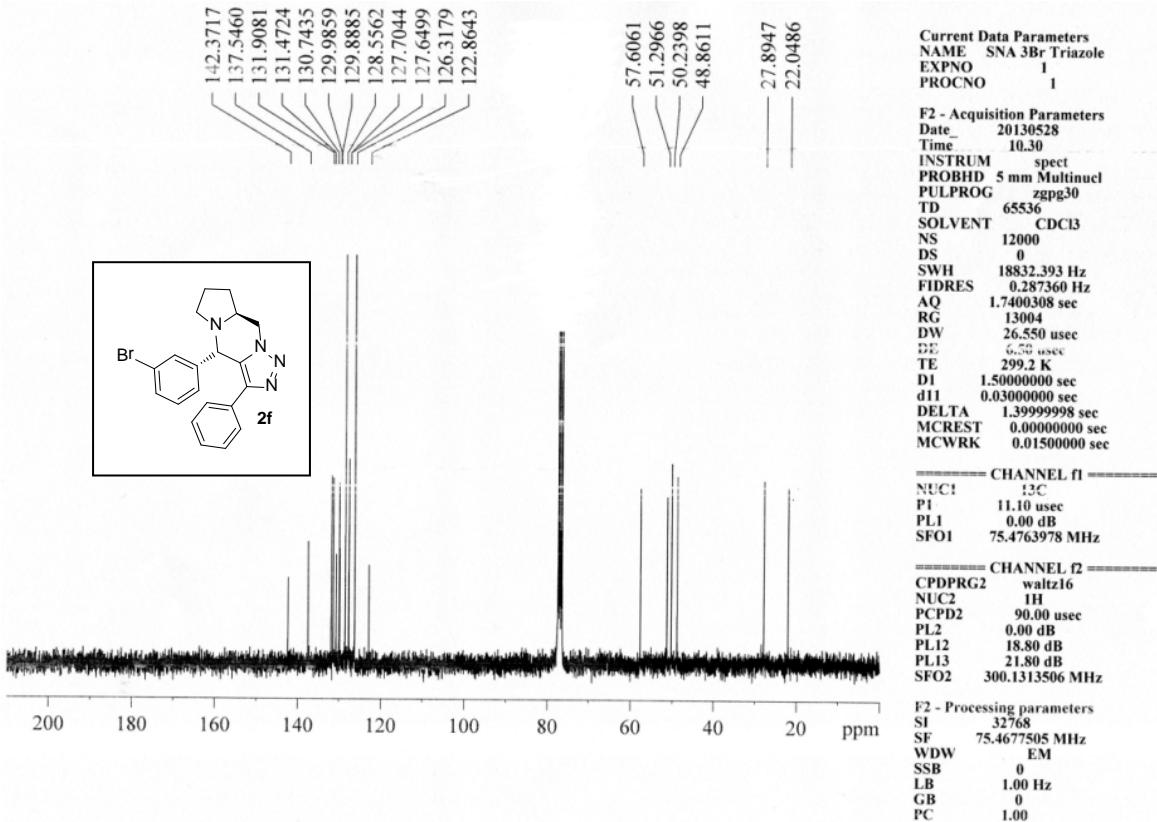

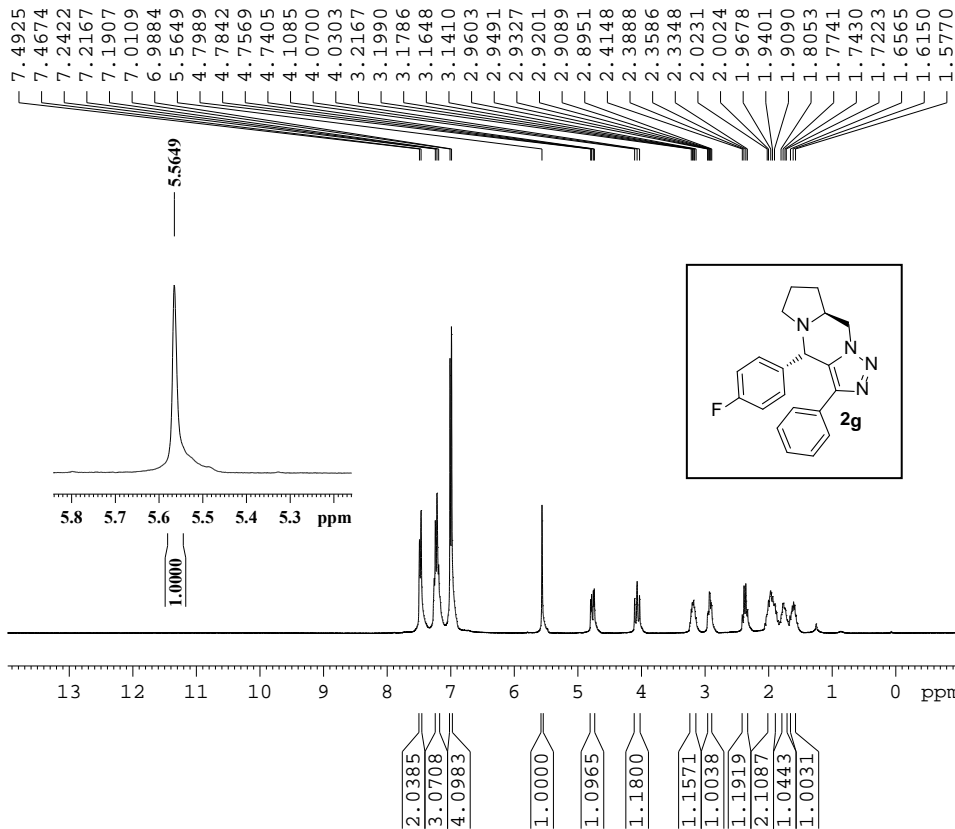

Current Data Parameters  
 NAME skl 4 ftaflo  
 EXPNO 1  
 PROCNO 1

F2 - Acquisition Parameters  
 Date\_ 20131020  
 Time 20.26  
 INSTRUM spect  
 PROBHD 5 mm Multinucl  
 PULPROG zg30  
 TD 32768  
 SOLVENT CDCl3  
 NS 8  
 DS 0  
 SWH 496.403 Hz  
 FIDRES 0.137219 Hz  
 AQ 3.6438515 sec  
 RG 256  
 DW 111.200 usec  
 DE 6.50 usec  
 TE 301.2 K  
 D1 1.50000000 sec  
 MCREST 0.00000000 sec  
 MCWRK 0.01500000 sec

CHANNEL f1  
 NUC1 1H  
 P1 10.60 usec  
 PL1 0.00 dB  
 SFO1 300.1319508 MHz

F2 - Processing parameters  
 SI 16384  
 SF 300.1300068 MHz  
 WDW EM  
 SSB 0  
 LB 0.10 Hz  
 GB 0  
 PC 1.00

1D NMR plot parameters  
 CX 20.00 cm  
 CY 0.00 cm  
 F1P 13.968 ppm  
 F1 4192.23 Hz  
 F2P -1.013 ppm  
 F2 -304.18 Hz  
 PPMCM 0.74908 ppm/cm  
 HZCM 224.82013 Hz/cm

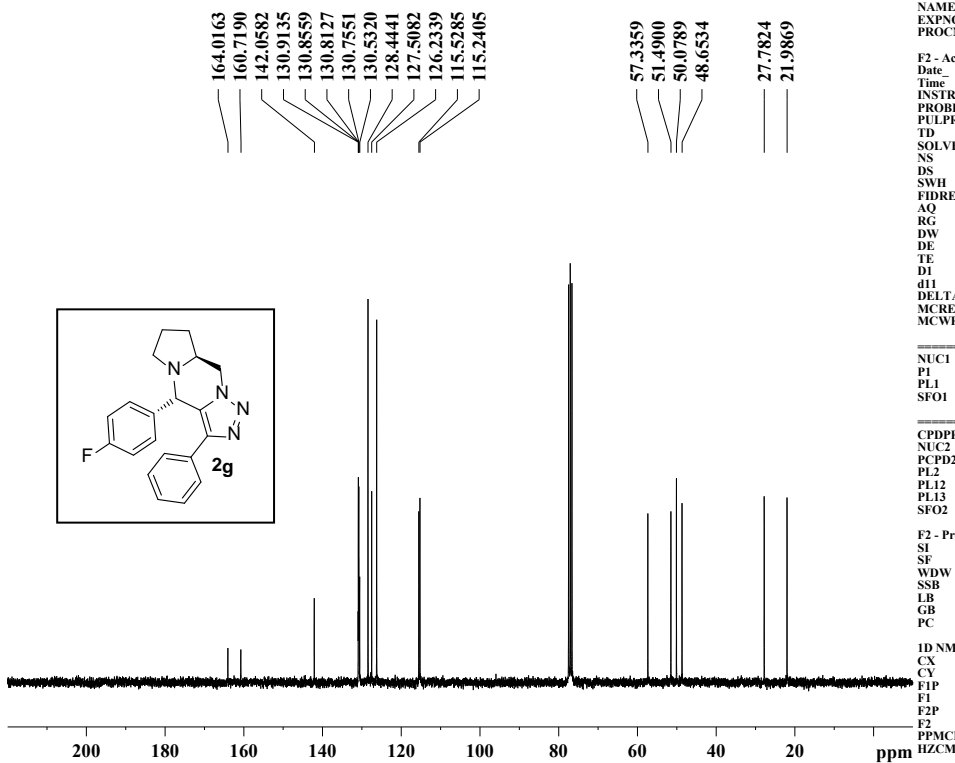

Current Data Parameters  
 NAME SNA A23 C13  
 EXPNO 1  
 PROCNO 1

F2 - Acquisition Parameters  
 Date\_ 20130508  
 Time 3.00  
 INSTRUM spect  
 PROBHD 5 mm Multinucl  
 PULPROG zgpg30  
 TD 65536  
 SOLVENT CDCl3  
 NS 1000  
 DS 0  
 SWH 18832.393 Hz  
 FIDRES 0.287360 Hz  
 AQ 1.7400308 sec  
 RG 5792.6  
 DW 26.550 usec  
 DE 6.50 usec  
 TE 300.2 K  
 D1 1.50000000 sec  
 d11 0.03000000 sec  
 DELTA 1.39999998 sec  
 MCREST 0.00000000 sec  
 MCWRK 0.01500000 sec

CHANNEL f1  
 NUC1 13C  
 P1 11.10 usec  
 PL1 0.00 dB  
 SFO1 75.4763978 MHz

CHANNEL f2  
 CPDPRG2 waltz16  
 NUC2 1H  
 PCPD2 90.00 usec  
 PL2 0.00 dB  
 PL12 18.80 dB  
 PL13 21.80 dB  
 SFO2 300.1313506 MHz

F2 - Processing parameters  
 SI 32768  
 SF 75.4677551 MHz  
 WDW EM  
 SSB 0  
 LB 1.00 Hz  
 GB 0  
 PC 1.00

1D NMR plot parameters  
 CX 20.00 cm  
 CY 12.50 cm  
 F1P 239.292 ppm  
 F1 18058.85 Hz  
 F2P -10.250 ppm  
 F2 -773.54 Hz  
 PPMCM 14.7711 ppm/cm  
 HZCM 941.61969 Hz/cm

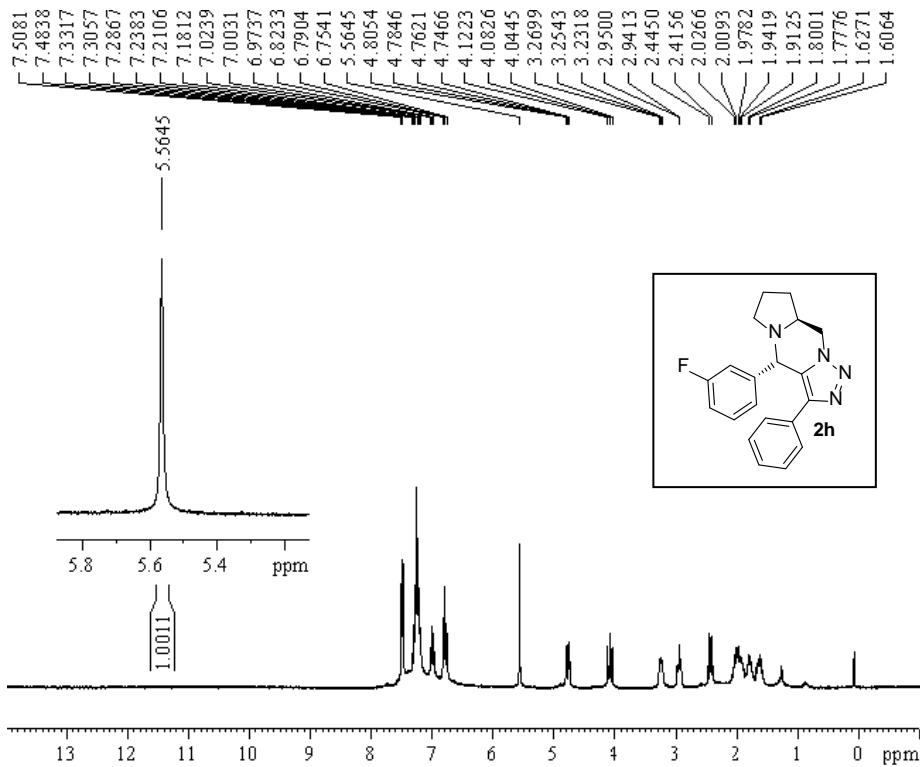

Current Data Parameters  
NAME sld3 f infb  
EXPNO 1  
PROCNO 1

F2 - Acquisition Parameters  
Date\_ 20131020  
Time 18.59  
INSTRUM spect  
PROBHD 5 mm Multinucl  
PULPROG zg30  
TD 32768  
SOLVENT CDCB  
NS 8  
DS 0  
SWH 4496.403 Hz  
FIDRES 0.137219 Hz  
AQ 3.6438515 sec  
RG 574.7  
DW 111.200 usec  
DE 6.50 usec  
TE 301.2 K  
D1 1.5000000 sec  
MCREST 0.0000000 sec  
MCWRK 0.0150000 sec

==== CHANNEL f1 =====  
NUC1 1H  
P1 10.60 usec  
PL1 0.00 dB  
SFO1 300.1319508 MHz

F2 - Processing parameters  
SI 16384  
SF 300.1300057 MHz  
WDW EM  
SSB 0  
LB 0.10 Hz  
GB 0  
PC 1.00

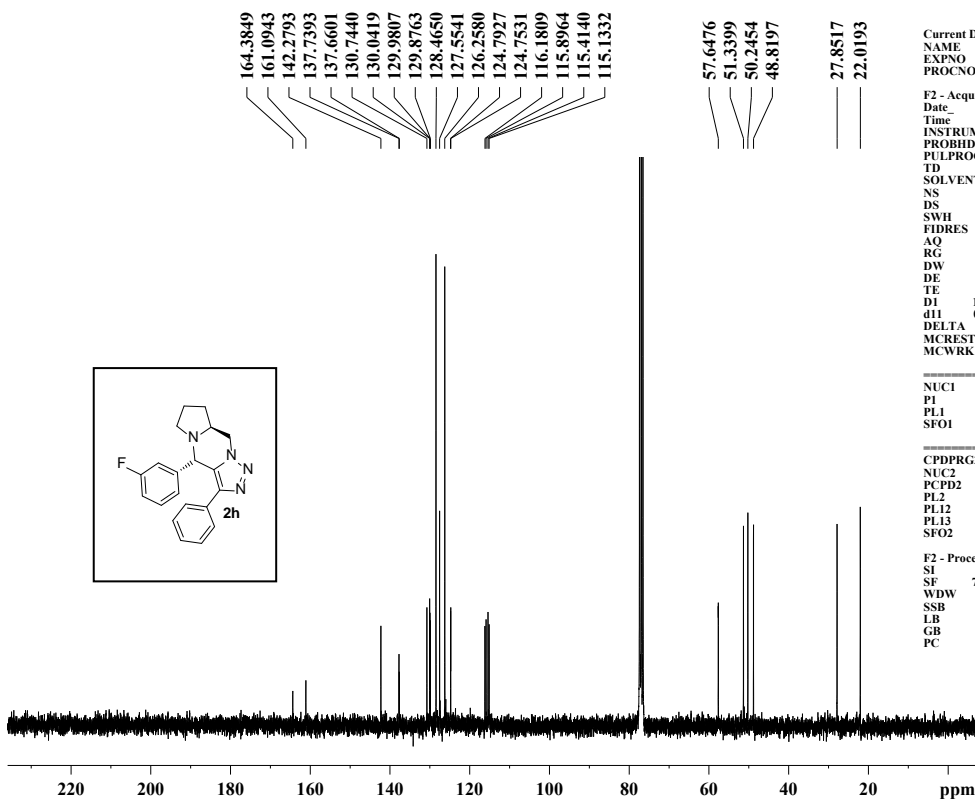

Current Data Parameters  
NAME 3f triazole  
EXPNO 1  
PROCNO 1

F2 - Acquisition Parameters  
Date\_ 20130708  
Time 9.23  
INSTRUM spect  
PROBHD 5 mm Multinucl  
PULPROG zgpg30  
TD 65536  
SOLVENT CDCl3  
NS 10707  
DS 0  
SWH 18832.393 Hz  
FIDRES 0.287360 Hz  
AQ 1.7400308 sec  
RG 18390.4  
DW 26.550 usec  
DE 6.50 usec  
TE 300.2 K  
D1 1.5000000 sec  
d11 0.0300000 sec  
DELTA 1.3999999 sec  
MCREST 0.0000000 sec  
MCWRK 0.0150000 sec

==== CHANNEL f1 =====  
NUC1 13C  
P1 11.10 usec  
PL1 0.00 dB  
SFO1 75.4763978 MHz

==== CHANNEL f2 =====  
CPDPRG2 waltz16  
NUC2 1H  
PCPD2 90.00 usec  
PL2 0.00 dB  
PL12 18.80 dB  
PL13 21.80 dB  
SFO2 300.1313506 MHz

F2 - Processing parameters  
SI 32768  
SF 75.4677534 MHz  
WDW EM  
SSB 0  
LB 1.00 Hz  
GB 0  
PC 1.00

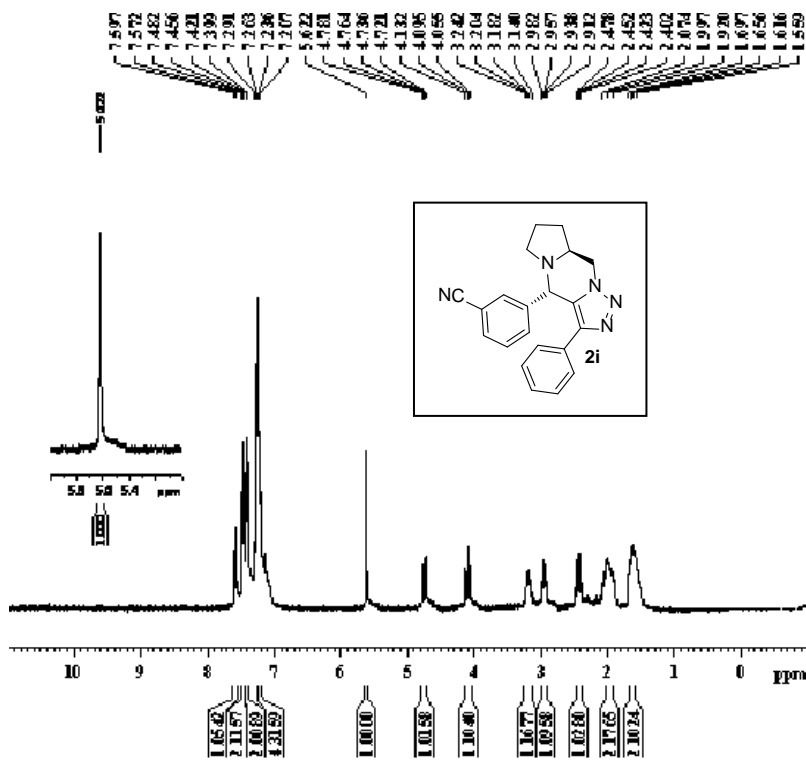

Current Data Parameters  
 NAME sld3en.talks  
 EXPNO 1  
 PROCNO 1

F2 - Acquisition Parameters  
 Date\_ 20131020  
 Time 22:41  
 INSTRUM spect  
 PROBHD 5 mm Multinucl  
 PULPROG zg30  
 TD 32768  
 SOLVENT CDCB  
 NS 8  
 DS 0  
 SWH 4496.003 Hz  
 FIDRES 0.137219 Hz  
 AQ 3.6419514 sec  
 RG 574.7  
 DW 111.200 usec  
 DE 6.50 usec  
 TE 301.2 K  
 D1 1.50000000 sec  
 MCREST 0.00000000 sec  
 MCWVK 0.01500000 sec

----- CHANNEL f1 -----  
 NUC1 1H  
 P1 10.60 usec  
 PL1 0.00 dB  
 SF01 300.1319508 MHz

F2 - Processing parameters  
 SI 16394  
 SF 300.1300076 MHz  
 WDW EM  
 SSB 0  
 LB 0.10 Hz  
 GB 0  
 PC 1.00

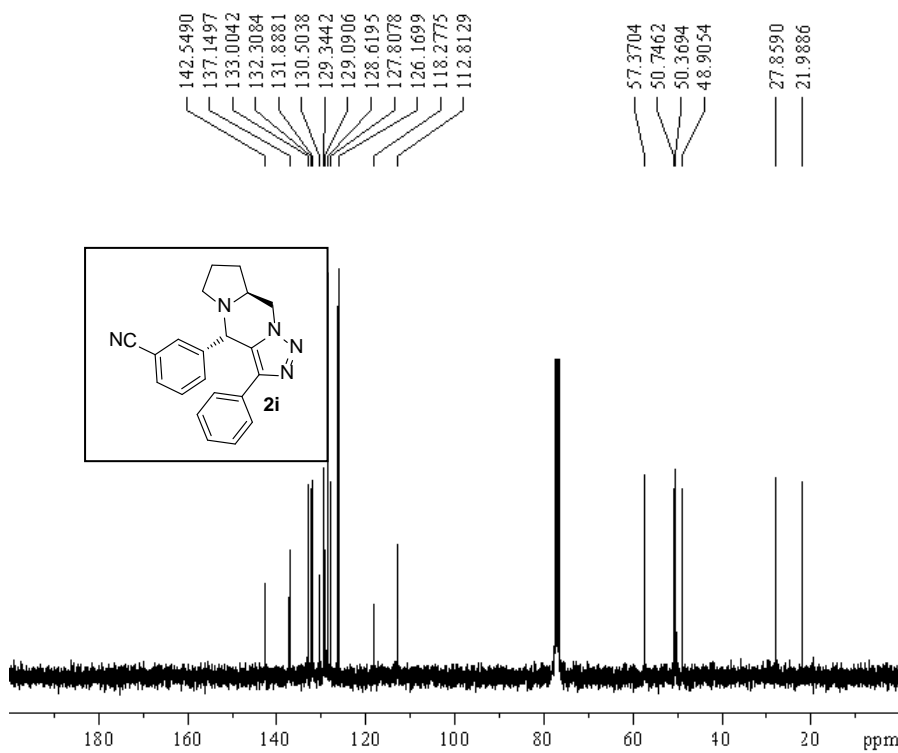

Current Data Parameters  
 NAME 3 cynotriazole 13C  
 EXPNO 1  
 PROCNO 1

F2 - Acquisition Parameters  
 Date\_ 20130716  
 Time 9:34  
 INSTRUM spect  
 PROBHD 5 mm Multinucl  
 PULPROG zgpg30  
 TD 65536  
 SOLVENT CDCB  
 NS 11377  
 DS 0  
 SWH 18832.393 Hz  
 FIDRES 0.287360 Hz  
 AQ 1.7400308 sec  
 RG 5792.6  
 DW 26.550 usec  
 DE 6.50 usec  
 TE 301.2 K  
 D1 1.50000000 sec  
 d11 0.03000000 sec  
 DELTA 1.39999998 sec  
 MCREST 0.00000000 sec  
 MCWVK 0.01500000 sec

----- CHANNEL f1 -----  
 NUC1 13C  
 P1 11.10 usec  
 PL1 0.00 dB  
 SF01 75.4763978 MHz

----- CHANNEL f2 -----  
 CPDPRG2 waltz16  
 NUC2 1H  
 PCPD2 90.00 usec  
 PL2 0.00 dB  
 PL12 18.80 dB  
 PL13 21.80 dB  
 SF02 300.1313506 MHz

F2 - Processing parameters  
 SI 32768  
 SF 75.4677517 MHz  
 WDW EM  
 SSB 0  
 LB 1.00 Hz  
 GB 0  
 PC 1.00



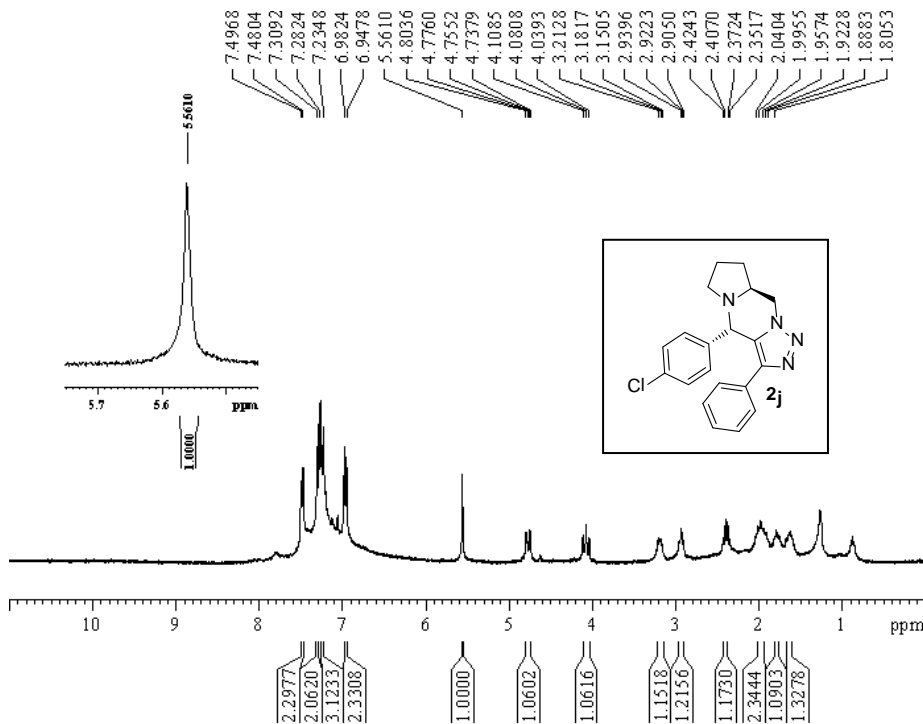

Current Data Parameters  
 NAME s141414f6  
 EXPNO 1  
 PROCNO 1

F2 - Acquisition Parameters  
 Date\_ 20131020  
 Time 20:33  
 INSTRUM spect  
 PROBHD 5 mm Multinucl  
 PULPROG zg30  
 TD 32768  
 SOLVENT CDCl3  
 NS 8  
 DS 0  
 SWH 4496.403 Hz  
 FIDRES 0.137219 Hz  
 AQ 3.6438515 sec  
 RG 512  
 DW 111.200 usec  
 DE 6.50 usec  
 TE 301.2 K  
 D1 1.5000000 sec  
 MCREST 0.0000000 sec  
 MCWRK 0.01500000 sec

==== CHANNEL f1 =====  
 NUC1 1H  
 P1 10.60 usec  
 PL1 0.00 dB  
 SFO1 300.1319508 MHz

F2 - Processing parameters  
 SI 16384  
 SF 300.1300657 MHz  
 WDW EM  
 SSB 0  
 LB 0.10 Hz  
 GB 0  
 PC 1.00

1D NMR plot parameters  
 CX 20.00 cm  
 CY 0.00 cm  
 FIP 13.972 ppm  
 F1 4193.22 Hz  
 F2 -1.010 ppm  
 FZ -303.08 Hz  
 PPMCM 0.74908 ppm/cm  
 HZCM 22482013 Hz/cm

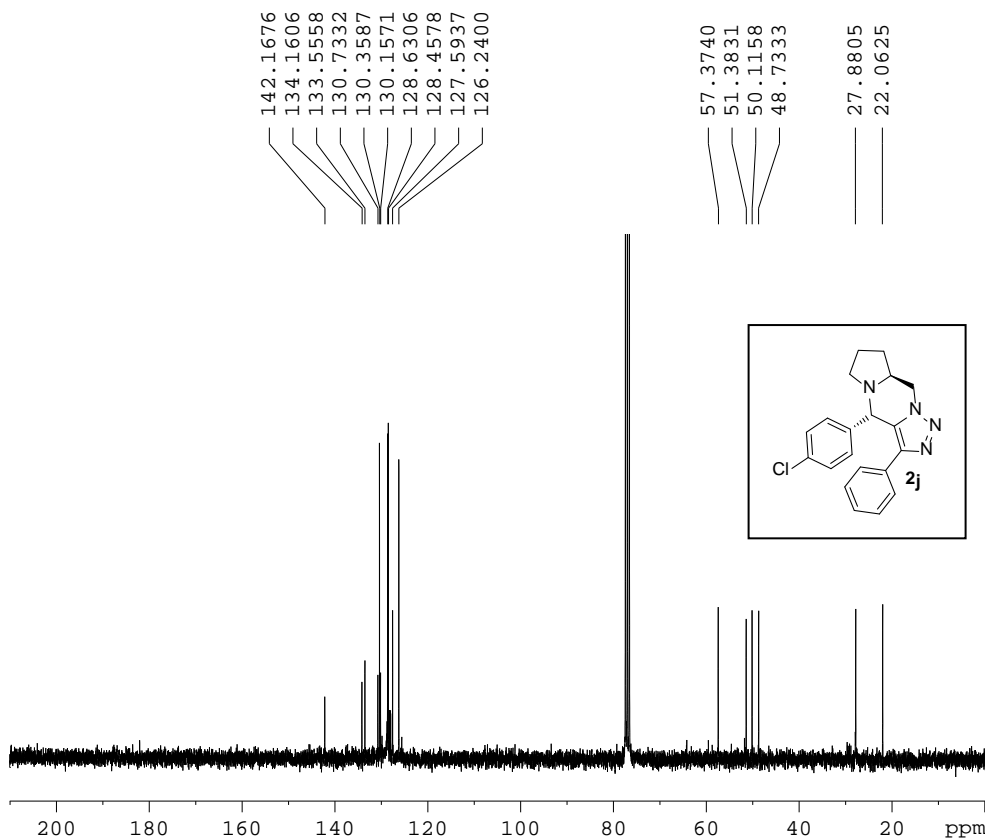

Current Data Parameters  
 NAME SNA del T C13  
 EXPNO 1  
 PROCNO 1

F2 - Acquisition Parameters  
 Date\_ 20130507  
 Time 4:49  
 INSTRUM spect  
 PROBHD 5 mm Multinucl  
 PULPROG zgpg30  
 TD 65536  
 SOLVENT CDCl3  
 NS 1000  
 DS 0  
 SWH 18832.393 Hz  
 FIDRES 0.287360 Hz  
 AQ 1.7400308 sec  
 RG 5792.6  
 DW 26.550 usec  
 DE 6.50 usec  
 TE 300.2 K  
 D1 1.5000000 sec  
 dH1 0.0300000 sec  
 DELTA 1.3999998 sec  
 MCREST 0.0000000 sec  
 MCWRK 0.01500000 sec

==== CHANNEL f1 =====  
 NUC1 13C  
 P1 11.10 usec  
 PL1 0.00 dB  
 SFO1 75.4763978 MHz

==== CHANNEL f2 =====  
 CPDPRG2 waltz16  
 NUC2 1H  
 PCPD2 90.00 usec  
 PL2 0.00 dB  
 PL12 18.80 dB  
 PL13 21.80 dB  
 SFO2 300.1313506 MHz

F2 - Processing parameters  
 SI 32768  
 SF 75.4677523 MHz  
 WDW EM  
 SSB 0  
 LB 1.00 Hz  
 GB 0  
 PC 1.00

1D NMR plot parameters  
 CX 20.00 cm  
 CY 12.50 cm  
 FIP 240.000 ppm  
 F1 18112.26 Hz  
 F2P 0.000 ppm  
 FZ 0.00 Hz  
 PPMCM 12.00000 ppm/cm  
 HZCM 905.61298 Hz/cm

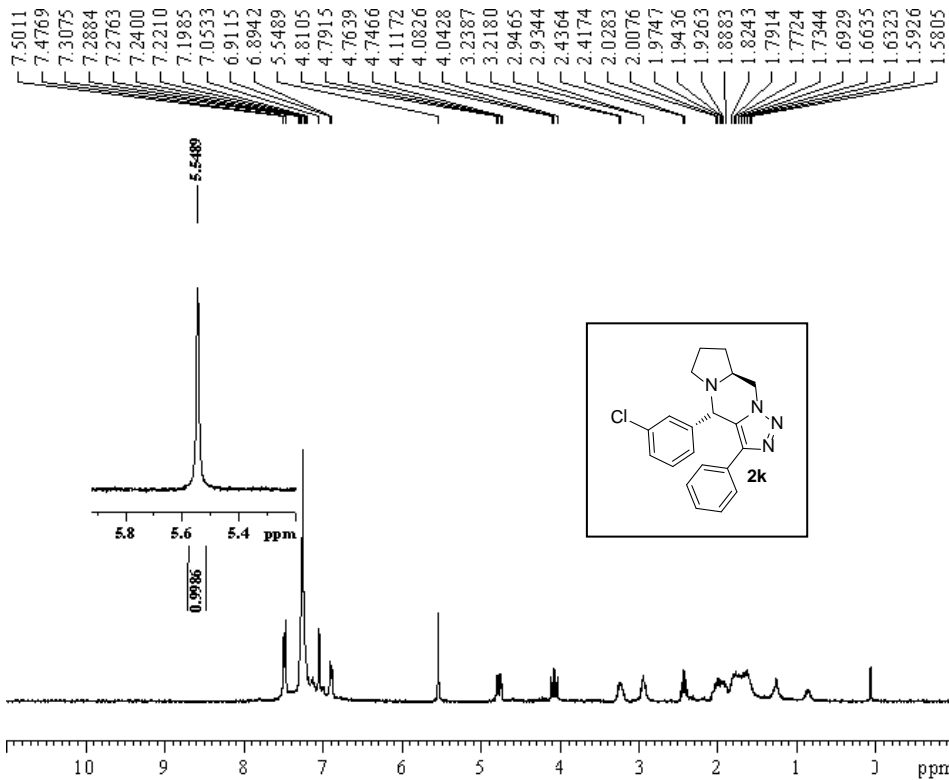

Current Data Parameters  
 NAME SNA383-cl-triazole  
 EXPNO 2  
 PROCNO 1

F2 - Acquisition Parameters  
 Date\_ 20130531  
 Time 16.48  
 INSTRUM spect  
 PROBHD 5 mm Multinucl  
 PULPROG zg30  
 TD 32768  
 SOLVENT CDCl3  
 NS 8  
 DS 0  
 SWH 4496.403 Hz  
 FIDRES 0.137219 Hz  
 AQ 3.6438515 sec  
 RC 724.1  
 DW 111.200 usec  
 DE 6.50 usec  
 TE 300.2 K  
 DI 1.5000000 sec  
 MCREST 0.0000000 sec  
 MCWRR 0.0150000 sec

===== CHANNEL f1 =====  
 NUC1 1H  
 P1 10.60 usec  
 PL1 0.00 dB  
 SFO1 300.1319508 MHz

F2 - Processing parameters  
 SI 16384  
 SF 300.130057 MHz  
 WDW EM  
 SSB 0  
 LB 0.10 Hz  
 GB 0  
 PC 1.00

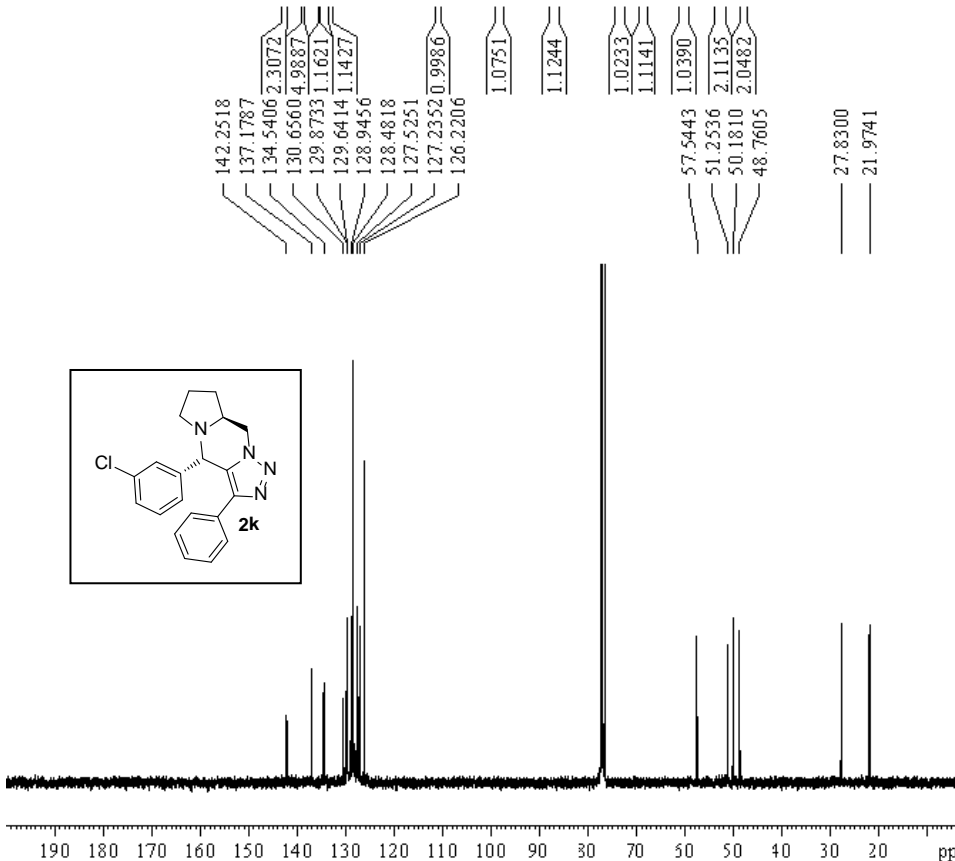

Current Data Parameters  
 NAME SNA383-TCB  
 EXPNO 1  
 PROCNO 1

F2 - Acquisition Parameters  
 Date\_ 20130507  
 Time 3.41  
 INSTRUM spect  
 PROBHD 5 mm Multinucl  
 PULPROG zgpg30  
 TD 65536  
 SOLVENT CDCl3  
 NS 1000  
 DS 0  
 SWH 18832.393 Hz  
 FIDRES 0.287360 Hz  
 AQ 1.7400388 sec  
 RC 16384  
 DW 26.550 usec  
 DE 6.50 usec  
 TE 300.2 K  
 DI 1.5000000 sec  
 d11 0.0300000 sec  
 DELTA 1.2999998 sec  
 MCREST 0.0000000 sec  
 MCWRR 0.0150000 sec

===== CHANNEL f1 =====  
 NUC1 13C  
 P1 11.10 usec  
 PL1 0.00 dB  
 SFO1 75.4763976 MHz

===== CHANNEL f2 =====  
 CENERG2 vsHz16  
 NUC2 1H  
 F CFB2 90.00 usec  
 PL2 0.00 dB  
 PL12 18.00 dB  
 PL13 21.00 dB  
 SFO2 300.1313806 MHz

F2 - Processing parameters  
 SI 32768  
 SF 75.4677534 MHz  
 WDW EM  
 SSB 0  
 LB 1.00 Hz  
 GB 0  
 FC 1.00

1D NMR plot parameters  
 CX 20.00 cm  
 CY 12.50 cm  
 FID 240.000 ppm  
 F1 16112.26 Hz  
 F2 1.00 ppm  
 F2 75.47 Hz  
 FFCM 12.0500 ppm/cm  
 HZ CM 909.38635 Hz/cm

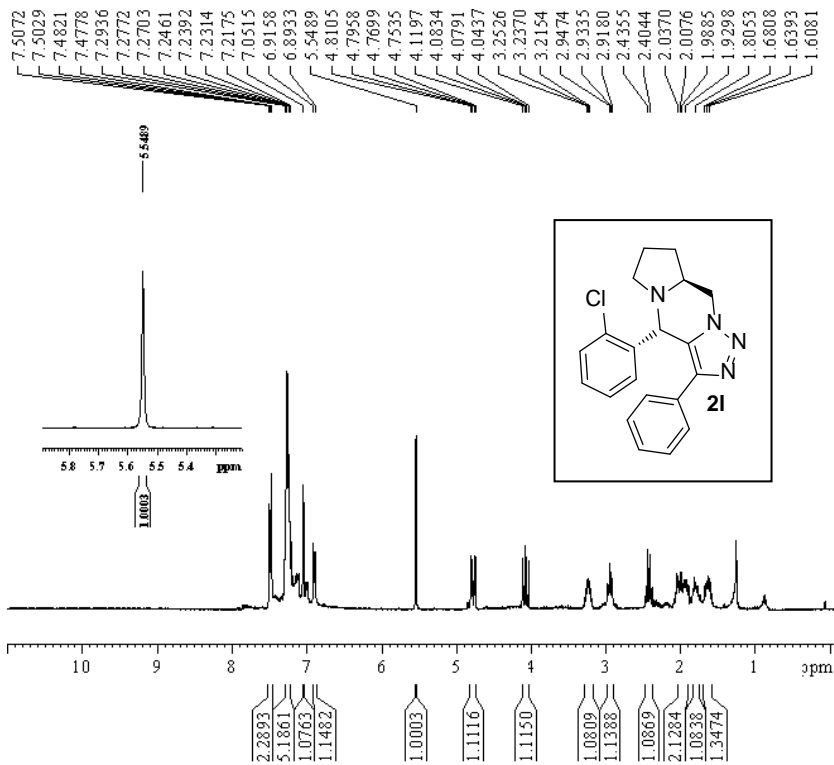

Current Data Parameters  
 NAME SIA 389 proton  
 EXPNO 2  
 PROCNO 1

F2 - Acquisition Parameters  
 Date\_ 20130403  
 Time 18.46  
 INSTRUM spect  
 PRORHD 5 mm Multinuc1  
 PULPROG zg30  
 TD 32768  
 SOLVENT CDCl3  
 NS 20  
 DS 0  
 SWH 4496.403 Hz  
 FIDRES 0.137219 Hz  
 AQ 3.6438515 sec  
 RG 645.1  
 DW 111.200 usec  
 DE 6.50 usec  
 TE 297.2 K  
 D1 1.50000000 sec  
 MCREST 0.00000000 sec  
 MCWRE 0.00500000 sec

===== CHANNEL f1 =====  
 NUC1 1H  
 P1 10.00 usec  
 PL1 0.00 dB  
 SFO1 300.1319508 MHz

F2 - Processing parameters  
 SI 16384  
 SF 300.1300063 MHz  
 WDW EM  
 SSB 0  
 LB 0.10 Hz  
 GB 0  
 PC 1.00

1D NMR plot parameters  
 CX 20.00 cm  
 CY 0.00 cm  
 CXP 13.970 ppm  
 FL 4192.77 Hz  
 F2P -1.012 ppm  
 F2 -303.63 Hz  
 PPM CM 0.74968 ppm/cm  
 HZ CM 224.62014 Hz/cm

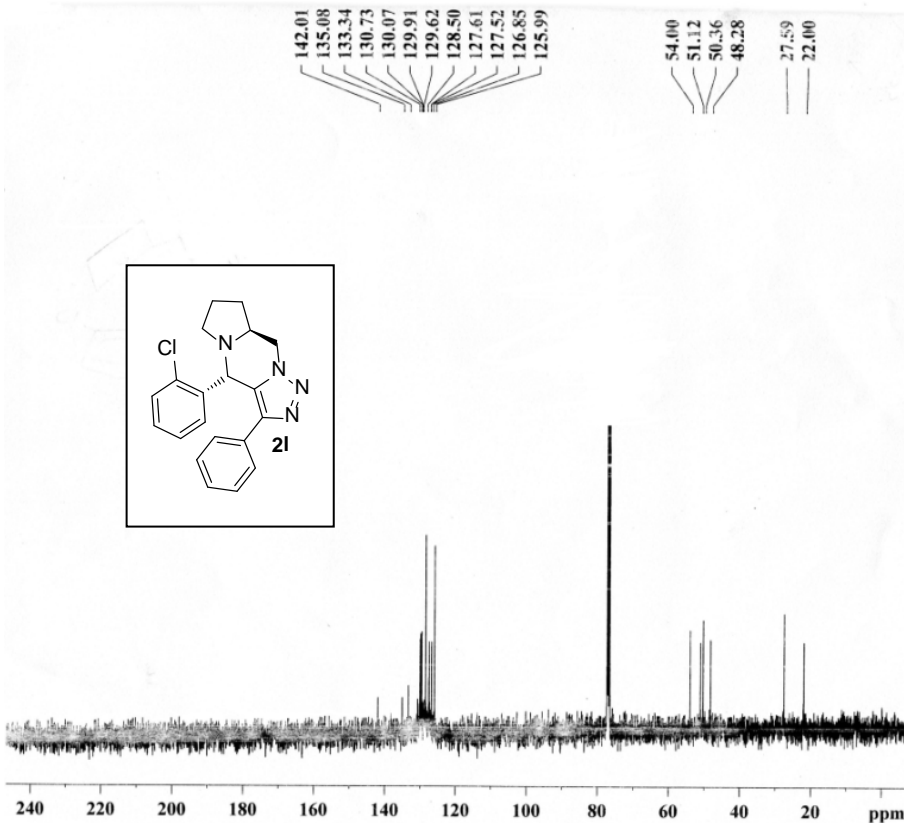

Current Data Parameters  
 NAME 2Cl-triazole  
 EXPNO 1  
 PROCNO 1

F2 - Acquisition Parameters  
 Date\_ 20130507  
 Time 21.11  
 INSTRUM spect  
 PRORHD 5 mm QNP 1H/13  
 PULPROG zgpg30  
 TD 65536  
 SOLVENT CDCl3  
 NS 500  
 DS 0  
 SWH 25510.203 Hz  
 FIDRES 0.389255 Hz  
 AQ 1.2845556 sec  
 RG 4  
 DW 19.600 usec  
 DE 7.00 usec  
 TE 298.2 K  
 D1 2.00000000 sec  
 d11 0.03000000 sec  
 DELTA 1.89999998 sec  
 TDO 1

===== CHANNEL f1 =====  
 NUC1 13C  
 P1 9.00 usec  
 PL1 0.00 dB  
 SFO1 100.6248425 MHz

===== CHANNEL f2 =====  
 CPDPRG2 waltz16  
 NUC2 1H  
 PCTD2 90.00 usec  
 PL2 -3.00 dB  
 PL12 14.00 dB  
 PL13 17.00 dB  
 SFO2 400.1316003 MHz

F2 - Processing parameters  
 SI 100.6127690 MHz  
 WDW EM  
 SSB 0  
 LB 2.00 Hz  
 GB 0  
 PC 1.00

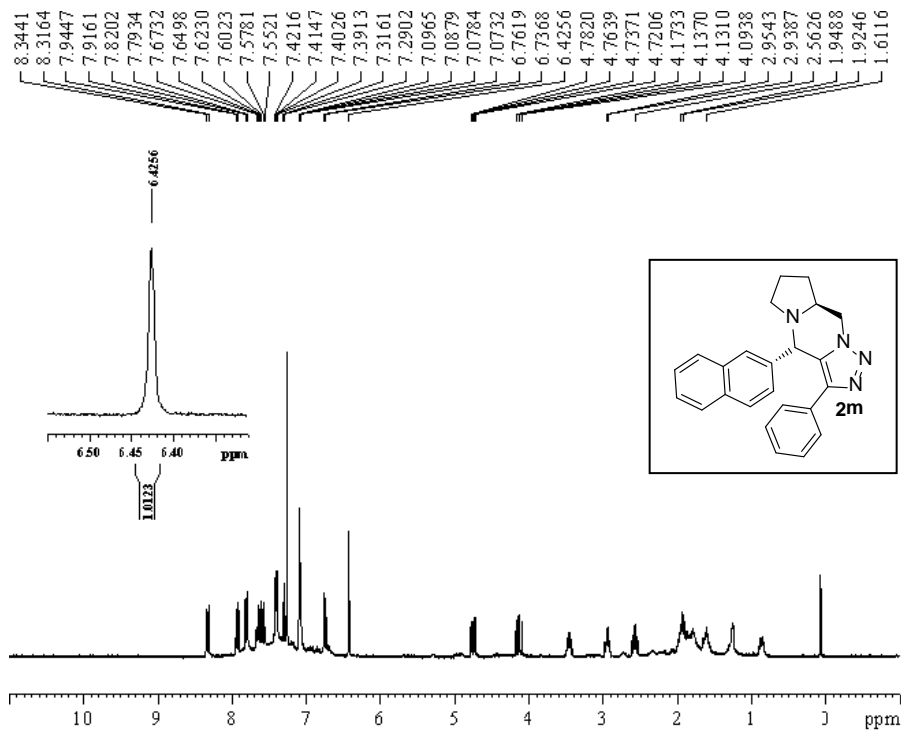

Current Data Parameters  
 NAME SNA A3 5  
 EXPNO 1  
 PROCNO 1

F2 - Acquisition Parameters  
 Date\_ 20130426  
 Time 20.26  
 INSTRUM spect  
 PROBHD 5mm Multinucl  
 PULPROG zg30  
 TD 32768  
 SOLVENT CDCl3  
 NS 8  
 DS 0  
 SWH 4496.403 Hz  
 FIDRES 0.137219 Hz  
 AQ 3.6438515 sec  
 RG 645.1  
 DW 111.200 usec  
 DE 6.50 usec  
 TE 297.2 K  
 D1 1.50000000 sec  
 MCREST 0.00000000 sec  
 MCWVK 0.01500000 sec

==== CHANNEL f1 =====  
 NUC1 1H  
 PL 10.60 usec  
 PL1 0.00 dB  
 SFO1 300.1319508 MHz

F2 - Processing parameters  
 SI 16384  
 SF 300.1300057 MHz  
 WDW EM  
 SSB 0  
 LB 0.10 Hz  
 GB 0  
 PC 1.00

1D NMR plot parameters  
 CX 20.00 cm  
 CY 0.00 cm  
 FIP 13.972 ppm  
 FI 4193.32 Hz  
 F2P -1.010 ppm  
 F2 -303.08 Hz  
 F2MCM 0.74908 ppm/cm  
 HZCM 224.82013 Hz/cm

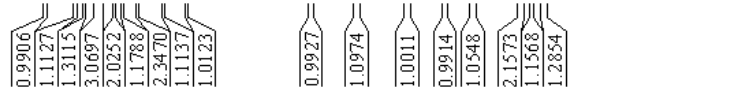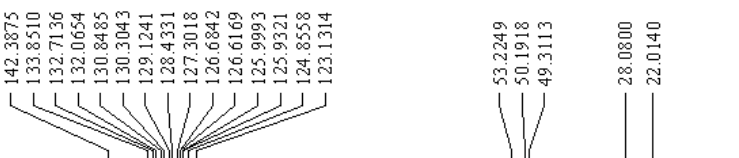

Current Data Parameters  
 NAME SNA 3naphthiazole  
 EXPNO 1  
 PROCNO 1

F2 - Acquisition Parameters  
 Date\_ 20130723  
 Time 10.29  
 INSTRUM spect  
 PROBHD 5mm Multinucl  
 PULPROG zgpg30  
 TD 65536  
 SOLVENT CDCl3  
 NS 11873  
 DS 0  
 SWH 18832.393 Hz  
 FIDRES 0.287360 Hz  
 AQ 1.7400308 sec  
 RG 5792.6  
 DW 26.550 usec  
 DE 6.50 usec  
 TE 300.2 K  
 D1 1.50000000 sec  
 d11 0.03000000 sec  
 DELTA 1.39999998 sec  
 MCREST 0.00000000 sec  
 MCWVK 0.01500000 sec

==== CHANNEL f1 =====  
 NUC1 13C  
 PL 11.10 usec  
 PL1 0.00 dB  
 SFO1 75.4763978 MHz

==== CHANNEL f2 =====  
 CPDPRG2 waltz16  
 NUC2 1H  
 PCPD2 90.00 usec  
 PL2 0.00 dB  
 PL12 18.80 dB  
 PL13 21.80 dB  
 SFO2 300.1313506 MHz

F2 - Processing parameters  
 SI 32768  
 SF 75.4677528 MHz  
 WDW EM  
 SSB 0  
 LB 1.00 Hz  
 GB 0  
 PC 1.00

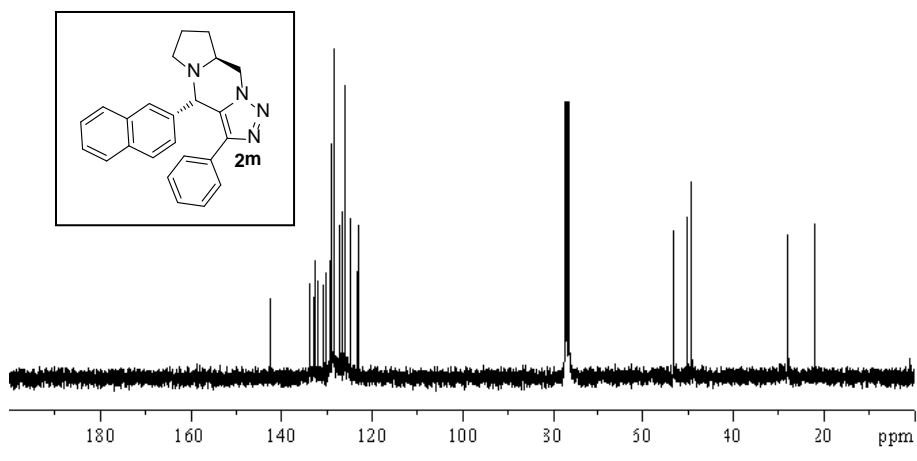

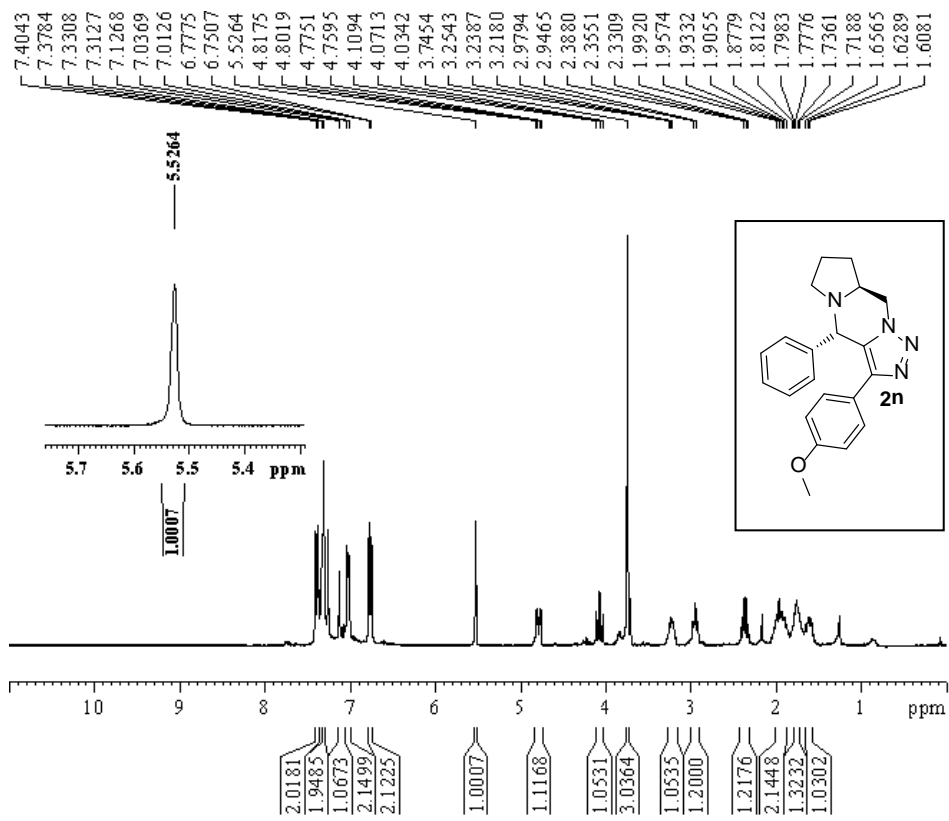

Current Data Parameters  
 NAME SNA 399 O CH3 pyacety  
 EXPNO 2  
 PROCNO 1

F2 - Acquisition Parameters  
 Date\_ 20130529  
 Time 21.45  
 INSTRUM spect  
 PROBHID 5mm Multinuc1  
 PULPROG zg30  
 TD 32768  
 SOLVENT CDCl3  
 NS 8  
 DS 0  
 SWH 4496.403 Hz  
 FIDRES 0.137219 Hz  
 AQ 3.6438515 sec  
 RG 512  
 DW 111.200 usec  
 DE 6.50 usec  
 TE 300.2 K  
 D1 1.5000000 sec  
 MCREST 0.0000000 sec  
 MCWRK 0.01500000 sec

===== CHANNEL f1 =====  
 NUC1 1H  
 P1 10.60 usec  
 PL1 0.00 dB  
 SFO1 300.1319508 MHz

F2 - Processing parameters  
 SI 16384  
 SF 300.1300057 MHz  
 WDW EM  
 SSB 0  
 LB 0.10 Hz  
 GB 0  
 PC 1.00

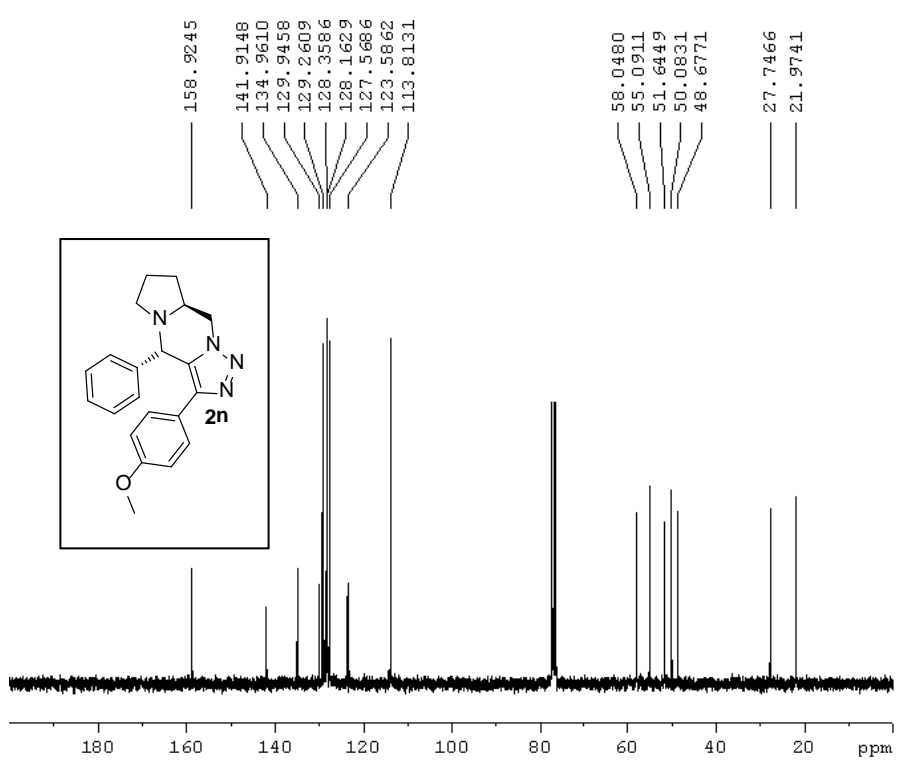

Current Data Parameters  
 NAME SNA 378 CB  
 EXPNO 1  
 PROCNO 1

F2 - Acquisition Parameters  
 Date\_ 20130507  
 Time 2.28  
 INSTRUM spect  
 PROBHID 5mm Multinuc1  
 PULPROG zgpg30  
 TD 65536  
 SOLVENT CDCl3  
 NS 1000  
 DS 0  
 SWH 18822.289 Hz  
 FIDRES 0.237550 Hz  
 AQ 1.7400208 sec  
 RG 10321.3  
 DW 265.30 usec  
 DE 6.50 usec  
 TE 300.2 K  
 D1 1.5000000 sec  
 d11 0.0300000 sec  
 DELTA 1.3999998 sec  
 MCREST 0.0000000 sec  
 MCWRK 0.01500000 sec

===== CHANNEL f1 =====  
 NUC1 13C  
 P1 11.10 usec  
 PL1 0.00 dB  
 SFO1 75.4762978 MHz

===== CHANNEL f2 =====  
 CHDRG2 waLz16  
 NUC2 1H  
 PPRG2 90.00 usec  
 PL2 0.00 dB  
 PL12 18.80 dB  
 PL13 21.80 dB  
 SFO2 300.1315306 MHz

F2 - Processing parameters  
 SI 32768  
 SF 75.4677328 MHz  
 WDW EM  
 SSB 0  
 LB 1.00 Hz  
 GB 0  
 PC 1.00

ID NMR p1 parameters  
 CX 20.00 cm  
 CY 12.30 cm  
 FID 240.000 ppm  
 F1 18112.26 Hz  
 F2 -1000 ppm  
 F3 -75.47 Hz  
 F4CM 12.05100 ppm/cm  
 HEZCM 9093865 Hz/cm

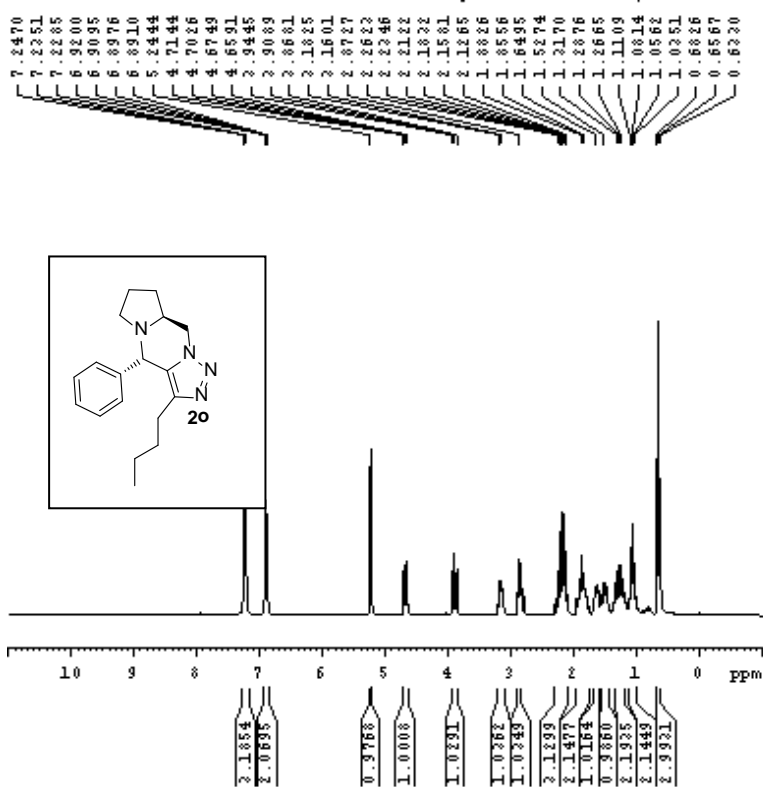

Current Data Parameters  
 NAME SNA hexyne  
 EXPNO 1  
 PROCNO 1

F2 - Acquisition Parameters  
 Date\_ 20130612  
 Time 15.25  
 INSTRUM spect  
 PROBHD 5mm Multisud  
 PULPROG zg30  
 TD 32768  
 SOLVENT CDCl3  
 NS 12  
 DS 0  
 SWH 4496.403 Hz  
 FIDRES 0.137219 Hz  
 AQ 3.6438515 sec  
 RG 362  
 DW 111.200 usec  
 DE 6.50 usec  
 TE 300.2 K  
 D1 1.5000000 sec  
 MCREST 0.0000000 sec  
 MCWRK 0.0150000 sec

----- CHANNEL f1 -----  
 NUC1 1H  
 P1 10.60 usec  
 PL1 0.00 dB  
 SFO1 300.1319508 MHz

F2 - Processing parameters  
 SI 16384  
 SF 300.1300071 MHz  
 WDW EM  
 SSB 0  
 LB 0.10 Hz  
 GB 0  
 PC 1.00

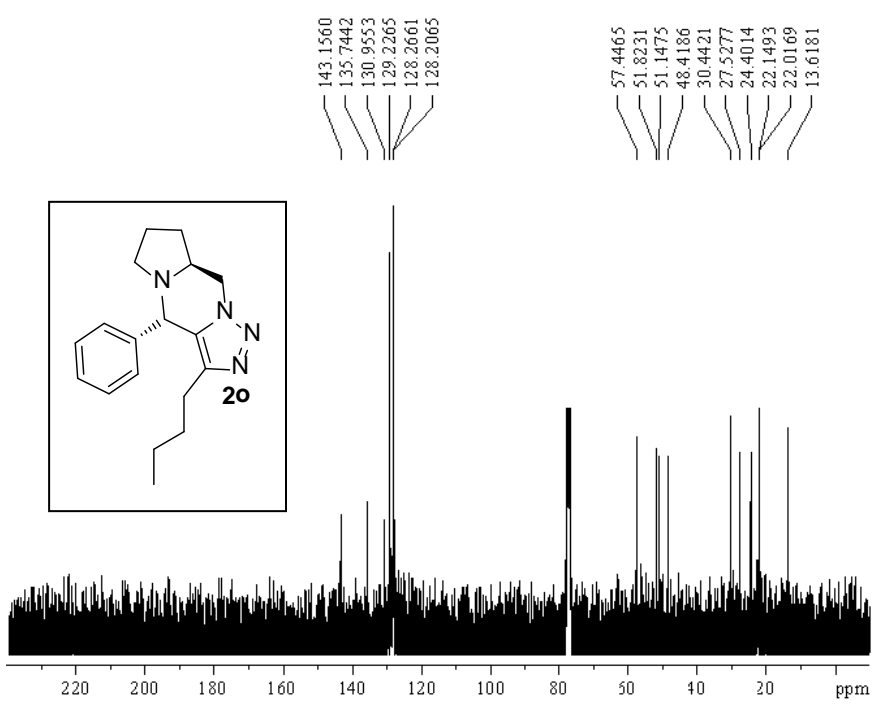

Current Data Parameters  
 NAME SNA 26 13C  
 EXPNO 1  
 PROCNO 1

F2 - Acquisition Parameters  
 Date\_ 20130618  
 Time 10.18  
 INSTRUM spect  
 PROBHD 5mm Multisud  
 PULPROG zgpg30  
 TD 65536  
 SOLVENT CDCl3  
 NS 12000  
 DS 0  
 SWH 18832.399 Hz  
 FIDRES 0.277860 Hz  
 AQ 1.7408348 sec  
 RG 10321.3  
 DW 26.550 usec  
 DE 6.50 usec  
 TE 300.2 K  
 D1 1.5000000 sec  
 D11 0.0300000 sec  
 DELTA 1.3999998 sec  
 MCREST 0.0000000 sec  
 MCWRK 0.0150000 sec

----- CHANNEL f1 -----  
 NUC1 13C  
 P1 11.10 usec  
 PL1 0.00 dB  
 SFO1 75.4763978 MHz

----- CHANNEL f2 -----  
 CTDPRG2 vzbz16  
 NUC2 1H  
 PCTD2 90.00 usec  
 PL2 0.00 dB  
 PL12 18.80 dB  
 PL13 21.80 dB  
 SFO2 300.1312806 MHz

F2 - Processing parameters  
 SI 32768  
 SF 75.4677500 MHz  
 WDW EM  
 SSB 0  
 LB 1.00 Hz  
 GB 0  
 PC 1.00

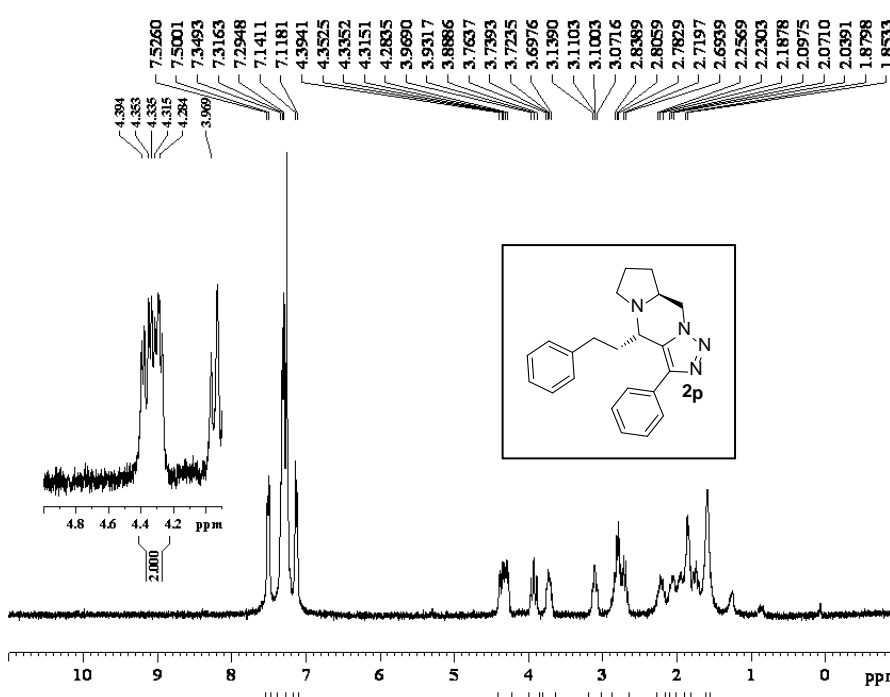

Current Data Parameters  
 NAME SNA378  
 EXPNO 1  
 PROCNO 1

F2 - Acquisition Parameters  
 Date 20130307  
 Time 21.25  
 INSTRUM spect  
 PROBHD 5 mm Multinucl  
 PULPROG zg30  
 TD 32768  
 SOLVENT CDCl3  
 NS 8  
 DS 0  
 SWH 4496.403 Hz  
 FIDRES 0.137219 Hz  
 AQ 3.6438515 sec  
 RG 1448.2  
 DW 111.200 usec  
 DE 6.50 usec  
 TE 298.2 K  
 D1 1.5000000 sec  
 MCREST 0.0000000 sec  
 MCWRK 0.0150000 sec

===== CHANNEL f1 =====  
 NUC1 1H  
 P1 10.60 usec  
 PL1 0.00 dB  
 SFO1 300.1319508 MHz

F2 - Processing parameters  
 SI 16384  
 SF 300.1300076 MHz  
 WDW EM  
 SSB 0  
 LB 0.10 Hz  
 GB 0  
 PC 1.00

ID NMR plot parameters  
 CX 20.00 cm  
 CY 0.00 cm  
 F1P 10.000 ppm  
 F1 3001.30 Hz  
 F2P -1.016 ppm  
 F2 -305.00 Hz  
 PPMCM 0.55081 ppm/cm  
 HZCM 165.31503 Hz/cm

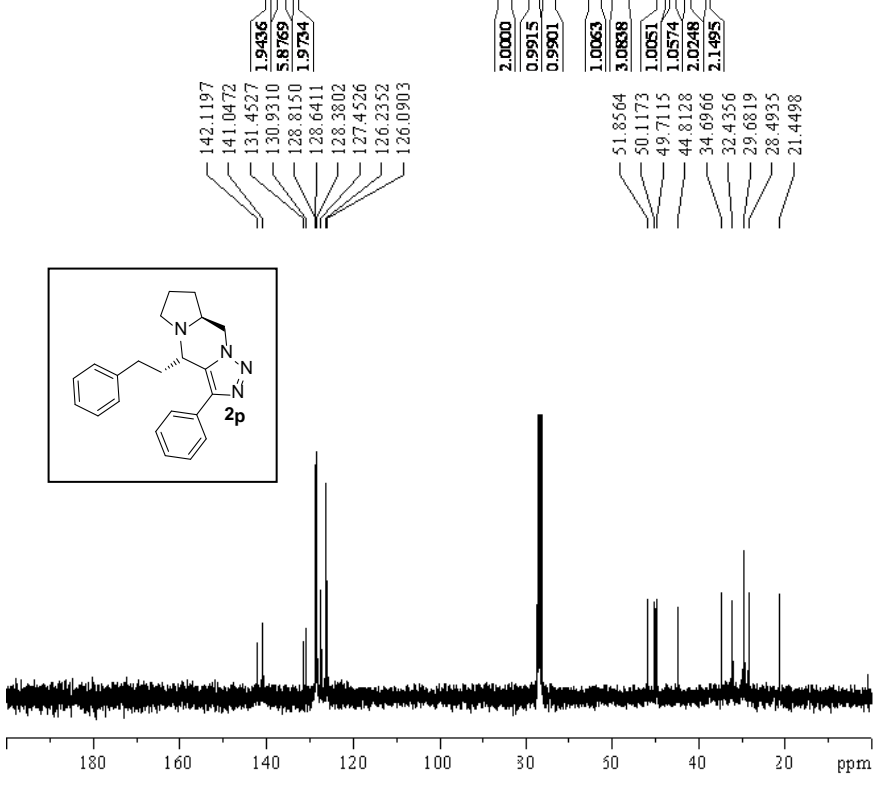

Current Data Parameters  
 NAME SNA Decenam.13 C  
 EXPNO 1  
 PROCNO 2

F2 - Acquisition Parameters  
 Date 20130707  
 Time 10.02  
 INSTRUM spect  
 PROBHD 5 mm Multinucl  
 PULPROG zgpg30  
 TD 65536  
 SOLVENT CDCl3  
 NS 8046  
 DS 0  
 SWH 18832.393 Hz  
 FIDRES 0.287260 Hz  
 AQ 1.7400308 sec  
 RG 3792.6  
 DW 26.500 usec  
 DE 6.50 usec  
 TE 300.2 K  
 D1 1.5000000 sec  
 d11 0.0300000 sec  
 DELTA 1.39999998 sec  
 MCREST 0.0000000 sec  
 MCWRK 0.0150000 sec

===== CHANNEL f1 =====  
 NUC1 13C  
 P1 11.10 usec  
 PL1 0.00 dB  
 SFO1 75.4763978 MHz

===== CHANNEL f2 =====  
 CPDPRG2 waltz16  
 NUC2 1H  
 PCPD2 90.00 usec  
 PL2 0.00 dB  
 PL12 18.80 dB  
 PL13 21.80 dB  
 SFO2 300.1313806 MHz

F2 - Processing parameters  
 SI 32768  
 SF 75.4677546 MHz  
 WDW EM  
 SSB 0  
 LB 1.00 Hz  
 GB 0  
 PC 1.00

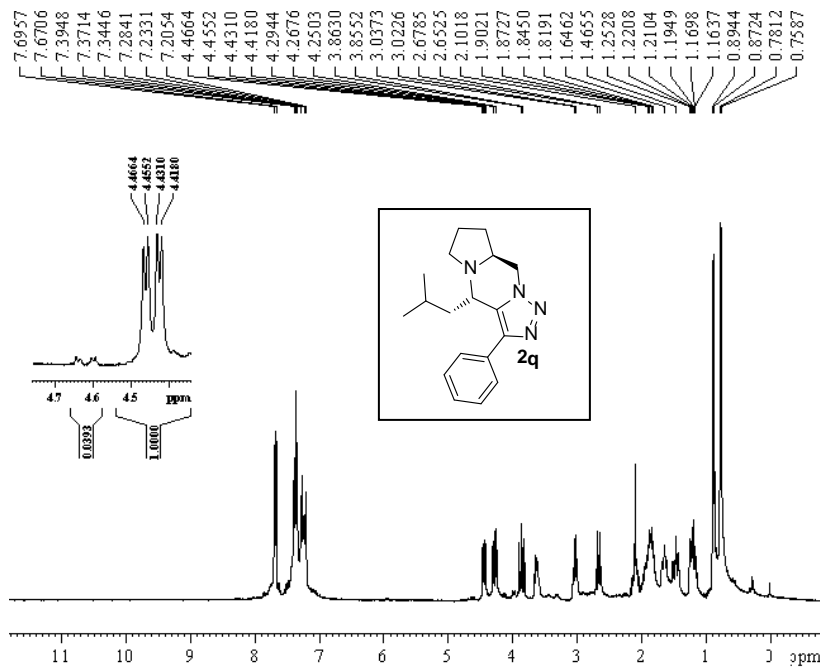

Current Data Parameters  
 NAME SNA A07 2 proton  
 EXPNO 1  
 PROCNO 1

F2 - Acquisition Parameters  
 Date\_ 20130507  
 Time 16.54  
 INSTRUM spect  
 PROBHD 5mm Multinuc1  
 PULPROG zg30  
 TD 32768  
 SOLVENT CDCl3  
 NS 8  
 DS 0  
 SWH 4496.403 Hz  
 FIDRES 0.137219 Hz  
 AQ 3.6438515 sec  
 RG 203.2  
 DW 111.200 usec  
 DE 6.50 usec  
 TE 300.2 K  
 D1 1.5000000 sec  
 MCREST 0.0000000 sec  
 MCWRC 0.0150000 sec

==== CHANNEL f1 =====  
 NUC1 1H  
 P1 10.60 usec  
 PL1 0.00 dB  
 SFO1 300.1313508 MHz

F2 - Processing parameters  
 SI 16384  
 SF 300.1300076 MHz  
 WDW EM  
 SSB 0  
 LB 0.10 Hz  
 GB 0  
 PC 1.00

1D NMR plot parameters  
 CX 20.00 cm  
 CY 0.00 cm  
 FFP 13.965 ppm  
 F1 4191.40 Hz  
 F2 -1.016 ppm  
 FZ -305.00 Hz  
 PPMCM 0.74008 ppm/cm  
 HZCM 224.82013 Hz/cm

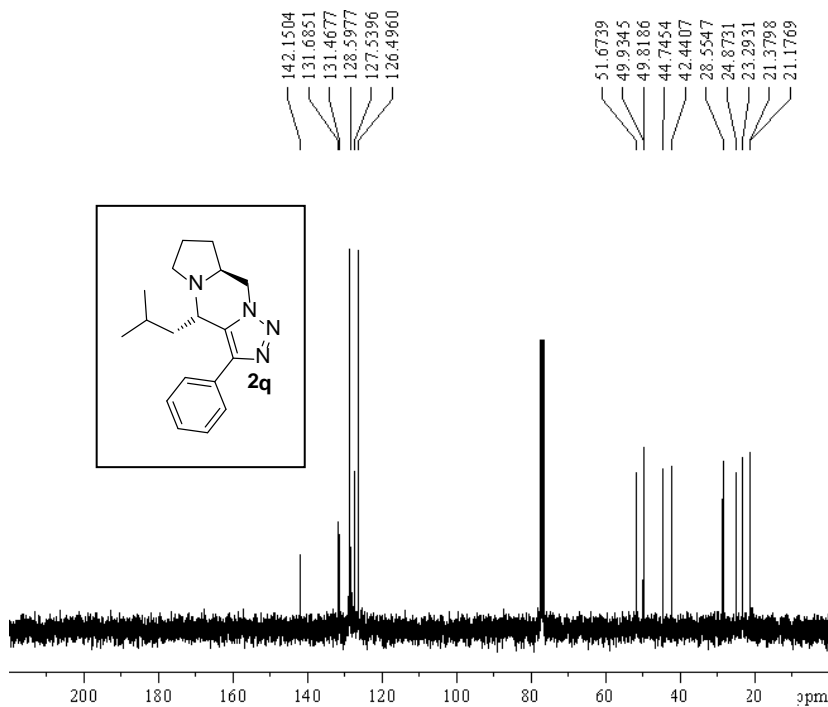

Current Data Parameters  
 NAME SNA A071 C13  
 EXPNO 1  
 PROCNO 1

F2 - Acquisition Parameters  
 Date\_ 20130507  
 Time 13.54  
 INSTRUM spect  
 PROBHD 5mm Multinuc1  
 PULPROG zgpg30  
 TD 65536  
 SOLVENT CDCl3  
 NS 945  
 DS 0  
 SWH 1832.303 Hz  
 FIDRES 0.267360 Hz  
 AQ 1.7500308 sec  
 RG 5792.6  
 DW 26.550 usec  
 DE 6.50 usec  
 TE 300.2 K  
 D1 1.5000000 sec  
 d11 0.0300000 sec  
 DELTA 1.3999998 sec  
 MCREST 0.0000000 sec  
 MCWRC 0.0150000 sec

==== CHANNEL f1 =====  
 NUC1 13C  
 P1 11.10 usec  
 PL1 0.00 dB  
 SFO1 75.4763976 MHz

==== CHANNEL f2 =====  
 NUC2 1H  
 P2 90.00 usec  
 PL2 0.00 dB  
 PL12 18.00 dB  
 PL13 21.00 dB  
 SFO2 300.1313506 MHz

F2 - Processing parameters  
 SI 22780  
 SF 75.4675334 MHz  
 WDW EM  
 SSB 0  
 LB 1.00 Hz  
 GB 0  
 PC 1.00

1D NMR plot parameters  
 CX 20.00 cm  
 CY 12.50 cm  
 FFP 233.315 ppm  
 F1 18000.58 Hz  
 F2 10.227 ppm  
 FZ -711.82 Hz  
 PPMCM 12.47711 ppm/cm  
 HZCM 941.63957 Hz/cm



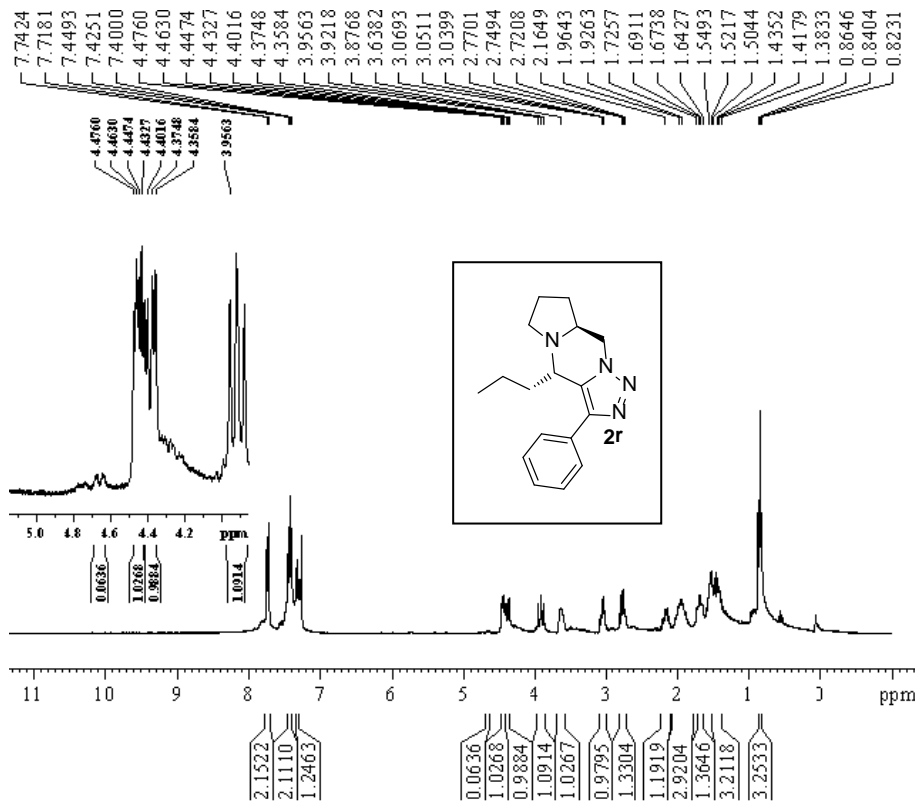

Current Data Parameters  
 NAME SNA.A.10 2 proton  
 EXPNO 1  
 PROCNO 1

F2 - Acquisition Parameters  
 Date\_ 20130507  
 Time 16.40  
 INSTRUM spect  
 PROBHD 5 mm Multinuc  
 PULPROG zg30  
 TD 32768  
 SOLVENT CDCl3  
 NS 8  
 DS 0  
 SWH 4496.403 Hz  
 FIDRES 0.137219 Hz  
 AQ 3.6438515 sec  
 RG 256  
 DW 111.200 usec  
 DE 6.50 usec  
 TE 300.2 K  
 D1 1.50000000 sec  
 MCREST 0.00000000 sec  
 MCWRK 0.01500000 sec

==== CHANNEL f1 =====

NUC1 1H  
 P1 10.00 usec  
 PL1 0.00 dB  
 SFO1 300.1319506 MHz

F2 - Processing parameters  
 SI 16384  
 SF 300.1300054 MHz  
 WDW EM  
 SSB 0  
 LB 0.10 Hz  
 GB 0  
 PC 1.00

1D NMR plot parameters  
 CX 20.00 cm  
 CY 0.00 cm  
 FIP 13.973 ppm  
 FI 4193.60 Hz  
 F2P -1.009 ppm  
 F2 -302.80 Hz  
 PPMCM 0.74908 ppm/cm  
 HZ CM 224.82014 Hz/cm

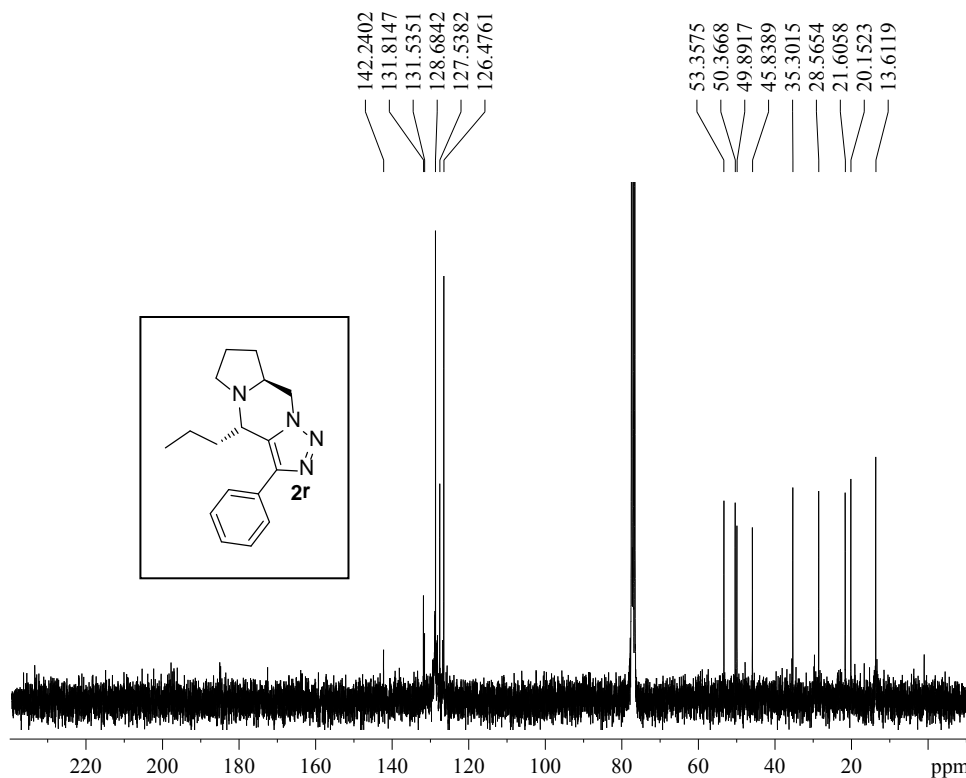

Current Data Parameters  
 NAME butarald triazole nw 13C  
 EXPNO 1  
 PROCNO 1

F2 - Acquisition Parameters  
 Date\_ 20130702  
 Time 10.48  
 INSTRUM spect  
 PROBHD 5 mm Multinuc  
 PULPROG zgpg30  
 TD 65536  
 SOLVENT CDCl3  
 NS 12000  
 DS 0  
 SWH 18832.393 Hz  
 FIDRES 0.287360 Hz  
 AQ 1.7400308 sec  
 RG 5792.6  
 DW 26.550 usec  
 DE 6.50 usec  
 TE 301.2 K  
 D1 1.50000000 sec  
 d11 0.03000000 sec  
 DELTA 1.39999998 sec  
 MCREST 0.00000000 sec  
 MCWRK 0.01500000 sec

==== CHANNEL f1 =====

NUC1 13C  
 P1 11.10 usec  
 PL1 0.00 dB  
 SFO1 75.4763978 MHz

==== CHANNEL f2 =====

CPDPRG2 waltz16  
 NUC2 1H  
 PCPD2 90.00 usec  
 PL2 0.00 dB  
 PL12 18.80 dB  
 PL13 21.80 dB  
 SFO2 300.1313506 MHz

F2 - Processing parameters  
 SI 32768  
 SF 75.4677517 MHz  
 WDW EM  
 SSB 0  
 LB 1.00 Hz  
 GB 0  
 PC 1.00

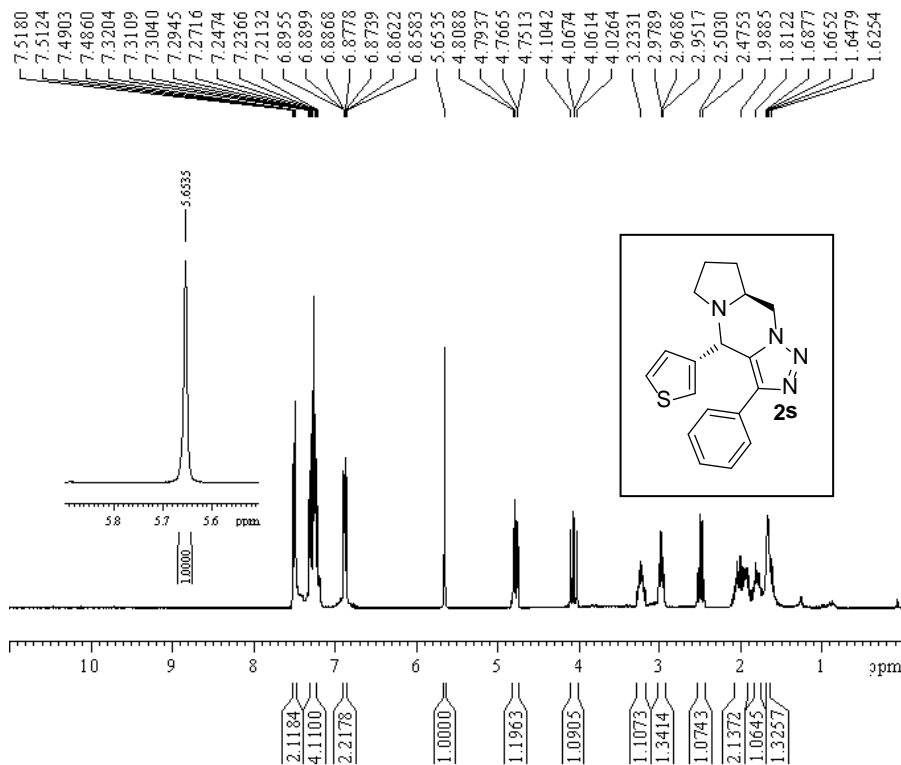

Current Data Parameters  
 NAME SNA 397 A.ppten  
 EXPNO 1  
 PROCNO 1

F2 - Acquisition Parameters  
 Date\_ 20130417  
 Time 23.30  
 INSTRUM spect  
 PROBHD 5mm Multinuc  
 PULPROG zg30  
 TD 32768  
 SOLVENT CDCl3  
 NS 15  
 DS 0  
 SWH 4496.403 Hz  
 FIDRES 0.137219 Hz  
 AQ 3.6438515 sec  
 RG 574.7  
 DW 111.200 usec  
 DE 6.50 usec  
 TE 299.2 K  
 D1 1.5000000 sec  
 MCREST 0.0000000 sec  
 MCWRK 0.01500000 sec

===== CHANNEL f1 =====  
 NUC1 1H  
 P1 10.60 usec  
 PL1 0.00 dB  
 SFO1 300.1319506 MHz

F2 - Processing parameters  
 SI 16364  
 SF 300.1300063 MHz  
 WDW EM  
 SSB 0  
 LB 0.10 Hz  
 GB 0  
 PC 1.00

1D NMR plot parameters  
 CX 20.00 cm  
 CY 0.00 cm  
 FIP 13.970 ppm  
 FI 4192.77 Hz  
 F2P -1.012 ppm  
 F2 -363.63 Hz  
 PPMCM 0.74908 ppm/cm  
 HZCM 224.82013 Hz/cm

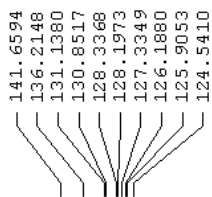

Current Data Parameters  
 NAME SNA 397 C13  
 EXTNO 1  
 PROCNO 1

F2 - Acquisition Parameters  
 Date\_ 20130607  
 Time 0.50  
 INSTRUM spect  
 PROBHD 5mm Multinuc  
 PULPROG zgpg30  
 TD 65536  
 SOLVENT CDCl3  
 NS 300  
 DS 0  
 SWH 16332.393 Hz  
 FIDRES 0.287360 Hz  
 AQ 1.7400000 sec  
 RG 5792.0  
 DW 26.550 usec  
 DE 6.50 usec  
 TE 300.2 K  
 D1 1.5000000 sec  
 d11 0.0300000 sec  
 DELTA 1.3999998 sec  
 MCREST 0.0000000 sec  
 MCWRK 0.01500000 sec

===== CHANNEL f1 =====  
 NUC1 13C  
 P1 11.10 usec  
 PL1 0.00 dB  
 SFO1 75.4763978 MHz

===== CHANNEL f2 =====  
 CDFPRG2 waltz16  
 NUC2 1H  
 FCFB2 90.00 usec  
 P12 0.00 dB  
 P13 18.80 dB  
 P15 21.80 dB  
 SFO2 300.1313506 MHz

F2 - Processing parameters  
 SI 32768  
 SF 75.4677477 MHz  
 WDW EM  
 SSB 0  
 LB 1.00 Hz  
 GB 0  
 FC 1.00

1D NMR plot parameters  
 CX 20.00 cm  
 CY 12.80 cm  
 FIP 239.391 ppm  
 FI 18066.29 Hz  
 F2P -10.151 ppm  
 F2 -766.10 Hz  
 PPMCM 12.47711 ppm/cm  
 HZCM 941.61957 Hz/cm

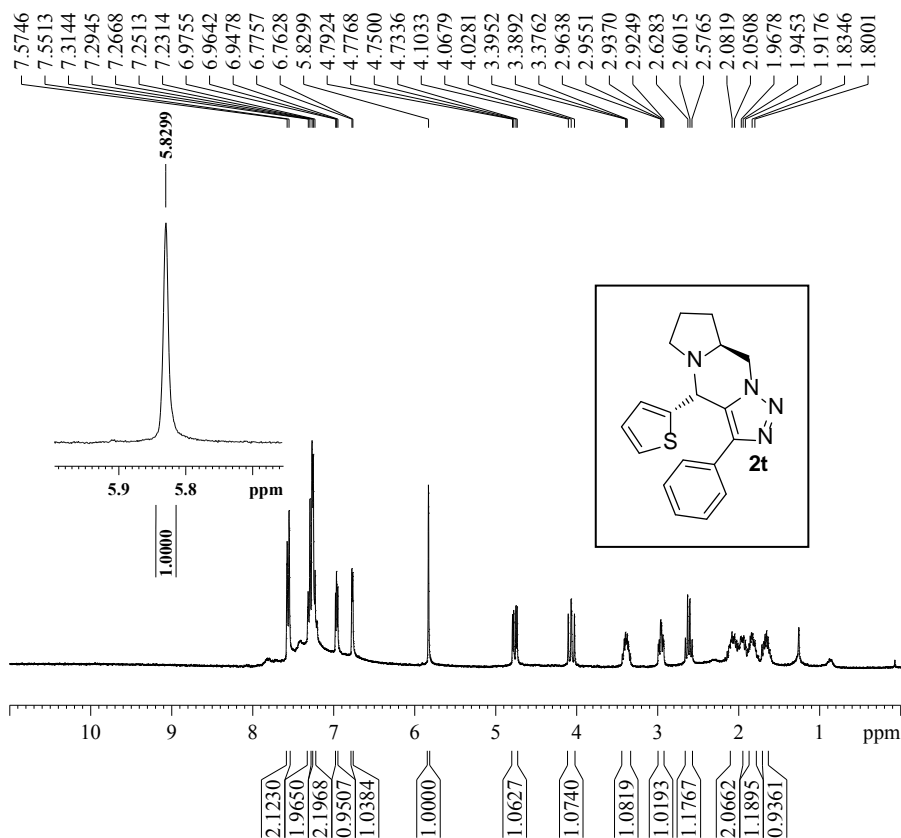

Current Data Parameters  
 NAME skl 2 thio tafo  
 EXPNO 1  
 PROCNO 1

F2 - Acquisition Parameters  
 Date\_ 20131020  
 Time 19.40  
 INSTRUM spect  
 PROBHD 5 mm Multinuc  
 PULPROG zg30  
 TD 32768  
 SOLVENT CDCl3  
 NS 8  
 DS 0  
 SWH 4496.403 Hz  
 FIDRES 0.137219 Hz  
 AQ 3.6438515 sec  
 RG 645.1  
 DW 111.200 usec  
 DE 6.50 usec  
 TE 301.2 K  
 D1 1.50000000 sec  
 MCREST 0.00000000 sec  
 MCWRK 0.01500000 sec

CHANNEL f1  
 NUC1 1H  
 P1 10.60 usec  
 PL1 0.00 dB  
 SFO1 300.1319508 MHz

F2 - Processing parameters  
 SI 16384  
 SF 300.1300057 MHz  
 WDW EM  
 SSB 0  
 LB 0.10 Hz  
 GB 0  
 PC 1.00

ID NMR plot parameters  
 CX 20.00 cm  
 CY 0.00 cm  
 FIP 13.972 ppm  
 FI 4193.32 Hz  
 F2P -1.010 ppm  
 F2 -303.08 Hz  
 PPMCM 0.74908 ppm/cm  
 HZCM 224.82013 Hz/cm

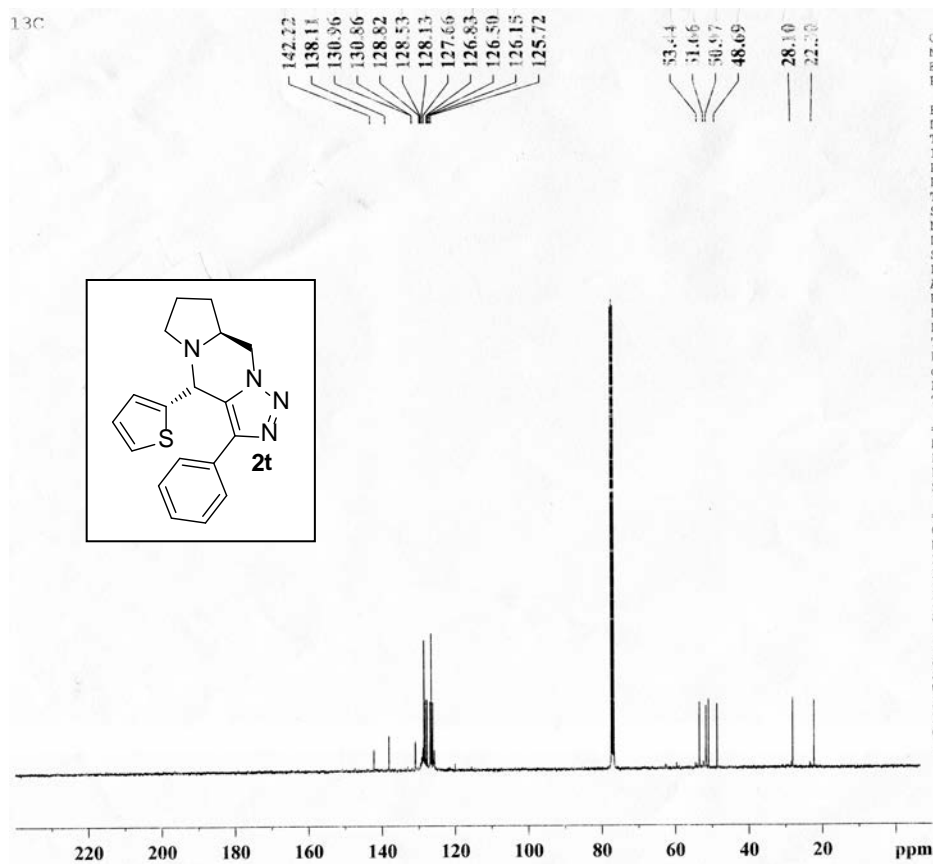

Current Data Parameters  
 NAME snaa513c  
 EXPNO 1  
 PROCNO 1

F2 - Acquisition Paramet  
 Date\_ 20130508  
 Time 10.54  
 INSTRUM spect  
 PROBHD 5 mm QNP 1H/13  
 PULPROG zgpg30  
 TD 65536  
 SOLVENT CDCl3  
 NS 9228  
 DS 0  
 SWH 25510.203  
 FIDRES 0.389255  
 AQ 1.2845556  
 RG 4  
 DW 19.600  
 DE 7.00  
 TE 300.0  
 D1 2.00000000  
 d11 0.03000000  
 DELTA 1.89999996  
 TD0 1

CHANNEL f1  
 NUC1 13C  
 P1 9.00  
 PL1 0.00  
 SFO1 100.6248425

CHANNEL f2  
 CPDPRG2 waltz16  
 NUC2 1H  
 PCPD2 90.00  
 PL2 -3.00  
 PL12 14.00  
 PL13 17.00  
 SFO2 400.1316005

F2 - Processing paramet  
 SI 32768  
 SF 100.6127690  
 WDW EM  
 SSB 0  
 LB 2.00  
 GB 0  
 PC 1.00
